# Supplementary material for: Computational design of metal hydrides on a defective metal–organic framework HKUST-1 for ethylene dimerization
Source: Royal Society of Chemistry journal article supplement (doi:10.1039/d3cp06257k), 2024-01-01
Supplement: d3cp06257k1.pdf [file d3cp06257k1.pdf]

## *Electronic Supplementary Information*

### **Computational design of metal hydrides on a defective metal–organic framework HKUST-1 for ethylene dimerization**

Karam Hashem,<sup>a,b</sup> Ramakrishna Krishnan,<sup>a</sup> Kuiwei Yang,<sup>a</sup> Bai Amutha Anjali,<sup>a</sup> Yugen Zhang<sup>b</sup> and Jianwen Jiang<sup>\*a</sup>

<sup>a</sup>*Department of Chemical and Biomolecular Engineering, National University of Singapore, 117576, Singapore*

<sup>b</sup>*Institute of Sustainability for Chemicals, Energy and Environment (ISCE2), Agency for Science, Technology and Research (A\*STAR), 1 Pasek Road Jurong Island, 627833, Singapore*

\*Email: chejj@nus.edu.sg

#### **Table of Contents**

|                                                                              |     |
|------------------------------------------------------------------------------|-----|
| S1. Heterogeneous catalysts for ethylene dimerization .....                  | S2  |
| S2. Transition metals .....                                                  | S3  |
| S3. Stability and multiplicity tests .....                                   | S4  |
| S4. Optimized M-M bond distances and NBO analysis .....                      | S6  |
| S5. Gibbs energies at different multiplicities .....                         | S12 |
| S6. Frequencies and structures of transition states .....                    | S21 |
| S7. Coordinates of intermediates and transition states at ground state ..... | S26 |
| S8. References .....                                                         | S92 |

## S1. Heterogeneous Catalysts for ethylene dimerization

**Table S1.** Heterogeneous catalysts for ethylene dimerization.

| Catalyst                                                              | TOF (h <sup>-1</sup> ) | Butene Selectivity (%) | Temperature (°C) | Pressure (bar) | Reference |
|-----------------------------------------------------------------------|------------------------|------------------------|------------------|----------------|-----------|
| NiSO <sub>4</sub> -Al <sub>2</sub> O <sub>3</sub>                     | 46                     | 100                    | 20               | 0.4            | 1         |
| NiSO <sub>4</sub> -Al <sub>2</sub> O <sub>3</sub> -ZrO <sub>2</sub>   | 223                    | 100                    | 20               | 0.4            | 2         |
| Ni-SiO <sub>2</sub> -Al <sub>2</sub> O <sub>3</sub>                   | N.A.                   | 83.9                   | 275              | 1              | 3         |
| NiO-TiO <sub>2</sub> /SO <sub>4</sub> <sup>2-</sup>                   | 5.2                    | 100                    | 20               | 0.4            | 4         |
| NiO-ZrO <sub>2</sub> /WO <sub>3</sub>                                 | 32.6                   | 100                    | 20               | 0.4            | 5         |
| NiO-ZrO <sub>2</sub> /MoO <sub>3</sub>                                | 21.5                   | 100                    | 20               | 0.4            | 6         |
| NiO/Al <sub>2</sub> O <sub>3</sub> -TiO <sub>2</sub> /WO <sub>3</sub> | 12.1                   | 100                    | 20               | 0.4            | 7         |
| NiO-ZrO <sub>2</sub> /SO <sub>4</sub> <sup>2-</sup>                   | 8.1                    | 100                    | 20               | 0.4            | 8         |
| Ni-MCM-22                                                             | 876                    | 81                     | 150              | 40             | 9         |
| Ni-MCM-36                                                             | 4193                   | 81                     | 70               | 40             | 9         |
| Ni/sulphated alumina                                                  | 752                    | 88.8                   | 50               | 0.7            | 10        |
| Ni-MIL101                                                             | 10455                  | 95                     | 25               | 30             | 11        |
| MFU-4l(Ni)                                                            | 41500                  | 96                     | 25               | 50             | 12        |
| NU-1000(Ni)                                                           | 16                     | 99                     | 45               | 2              | 13        |
| DHKUST-1(Ru)                                                          | 204                    | 99                     | 50 (80)          | 5 (55)         | 14-15     |
| DHKUST-1(Rh)                                                          | 1                      | 99                     | 50               | 5              | 15        |
| Ni-MOF-5                                                              | 352000                 | 35                     | 35               | 50             | 16        |

## S2. Transition metals

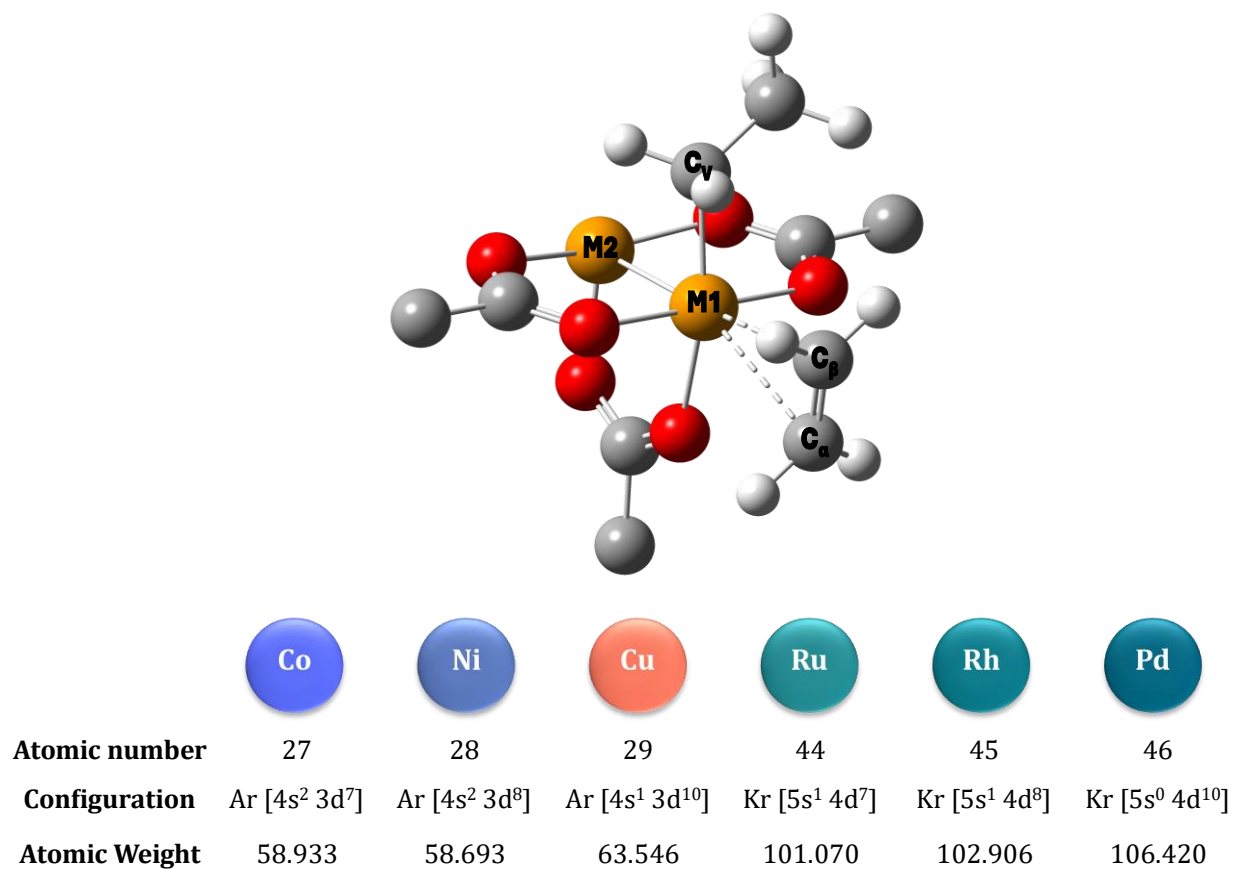

**Fig. S1.** Transition metals used in the design of H-M-DHKUST-1.

### S3. Stability and multiplicity tests

**Table S2.** Stability on H-Co-DHKUST-1.

| Multiplicity state   | Stability | $E^{\text{ele}}$ (Hartree) | $\Delta E$ (kcal/mol) |
|----------------------|-----------|----------------------------|-----------------------|
| Closed-shell singlet | Instable  | -4578.8193                 | 10.79                 |
| Open-shell singlet   |           | -4578.8274                 | 5.77                  |
| Triplet              | Stable    | -4578.8255                 | 6.91                  |
| Quintet              |           | -4578.8365                 | 0.00                  |
| Septet               |           | -4578.8042                 | 20.27                 |

**Table S3.** Stability on H-Ni-DHKUST-1.

| Multiplicity state   | Stability | $E^{\text{ele}}$ (Hartree) | $\Delta E$ (kcal/mol) |
|----------------------|-----------|----------------------------|-----------------------|
| Closed-shell singlet | Instable  | -4829.9137                 | 29.09                 |
| Open-shell singlet   |           | -4829.9418                 | 11.46                 |
| Triplet              | Stable    | -4829.9601                 | 0.00                  |
| Quintet              |           | -4829.8950                 | 41.12                 |

**Table S4.** Stability on H-Cu-DHKUST-1.

| Multiplicity state   | Stability | $E^{\text{ele}}$ (Hartree) | $\Delta E$ (kcal/mol) |
|----------------------|-----------|----------------------------|-----------------------|
| Closed-shell singlet | Stable    | -5094.2746                 | 0.00                  |
| Triplet              |           | -5094.2387                 | 22.54                 |

\*Only closed shell exists. The stability calculation of open shell leads to closed shell.

**Table S5.** Stability on H-Ru-DHKUST-1.

| Multiplicity state   | Stability | $E^{\text{ele}}$ (Hartree) | $\Delta E$ (kcal/mol) |
|----------------------|-----------|----------------------------|-----------------------|
| Closed-shell singlet | Instable  | -2003.1617                 | 12.38                 |
| Open-shell singlet   |           | -2003.1735                 | 5.00                  |
| Triplet              | Stable    | -2003.1815                 | 0.00                  |
| Quintet              |           | -2003.1800                 | 0.91                  |
| Septet               |           | -2003.1071                 | 46.64                 |
| Nonet                |           | -2002.9843                 | 123.74                |

**Table S6.** Stability on H-Rh-DHKUST-1.

| Multiplicity state    | Stability | $E^{\text{ele}}$ (Hartree) | $\Delta E$ (kcal/mol) |
|-----------------------|-----------|----------------------------|-----------------------|
| Closed-shell singlet* |           | -2034.5180                 | 0.00                  |
| Triplet               | Stable    | -2034.4993                 | 11.76                 |
| Quintet               |           | -2034.4682                 | 31.26                 |
| Septet                |           | -2034.3847                 | 83.65                 |

\*Only closed shell exists. The stability calculation of open shell leads to closed shell.

**Table S7.** Stability on H-Pd-DHKUST-1.

| Multiplicity state   | Stability | $E^{\text{ele}}$ (Hartree) | $\Delta E$ (kcal/mol) |
|----------------------|-----------|----------------------------|-----------------------|
| Closed-shell singlet | Instable  | -2069.1608                 | 1.56                  |
| Open-shell singlet   |           | -2069.1633                 | 0.00                  |
| Triplet              | Stable    | -2069.1596                 | 2.36                  |
| Quintet              |           | -2069.0488                 | 71.89                 |

**Table S8.** Stable configurations and electronic energies of intermediates and transition states on H-Cu-DHKUST-1 and H-Rh-DHKUST-1.

| Species      | H-Cu-DHKUST-1        |                             | H-Rh-DHKUST-1        |                             |
|--------------|----------------------|-----------------------------|----------------------|-----------------------------|
|              | Stable configuration | $E^{\text{ele}}$ (kcal/mol) | Stable configuration | $E^{\text{ele}}$ (kcal/mol) |
| <b>1</b>     | Closed shell         | -5094.2746                  |                      | -2034.5180                  |
| <b>2</b>     | Open shell           | -5172.8125                  |                      | -2113.1441                  |
| <b>TS2-3</b> |                      | -5172.7796                  |                      | -2113.1327                  |
| <b>3</b>     | Closed shell         | -5172.8374                  |                      | -2113.1333                  |
| <b>4</b>     |                      | -5251.3676                  | Closed shell         | -2191.7193                  |
| <b>TS4-5</b> | Open shell           | -5251.3323                  |                      | -2191.6499                  |
| <b>5</b>     | Closed shell         | -5251.4040                  |                      | -2191.6821                  |
| <b>6</b>     |                      | -5251.4006                  |                      | -2191.7234                  |
| <b>TS6-7</b> | Open shell           | -5251.3481                  |                      | -2191.6946                  |
| <b>7</b>     |                      | -5251.3829                  |                      | -2191.7108                  |

#### S4. Optimized M-M bond distances and NBO analysis

**Table S9.** Optimized M-M bond distances ( $\text{\AA}$ ), NBO charges ( $Q$  in terms of  $e$ ), and NBO spin density distributions ( $\rho$ ) in ground-state intermediates and transition states on H-Co-DHKUST-1.

|                         | Multiplicity | $\ell_{\text{Co1-Co2}}$ | $Q_{\text{Co1}}$ | $\rho_{\text{Co1}}$ | $Q_{\text{Co2}}$ | $\rho_{\text{Co2}}$ |
|-------------------------|--------------|-------------------------|------------------|---------------------|------------------|---------------------|
| <b>1</b>                | 5            | 2.45                    | 0.537            | 1.514               | 0.985            | 2.351               |
| <b>2</b>                | 5            | 2.37                    | 0.397            | 1.294               | 1.028            | 2.498               |
| <b>TS<sub>2-3</sub></b> | 3            | 2.46                    | 0.138            | -0.300              | 0.977            | 2.219               |
| <b>3</b>                | 5            | 2.41                    | 0.699            | 1.511               | 1.009            | 2.389               |
| <b>4</b>                | 5            | 2.44                    | 0.619            | 1.521               | 1.006            | 2.367               |
| <b>TS<sub>4-5</sub></b> | 3            | 2.61                    | 0.348            | -0.076              | 0.871            | 2.083               |
| <b>5</b>                | 7            | 2.8                     | 0.931            | 2.553               | 1.094            | 2.580               |
| <b>6</b>                | 7            | 2.70                    | 0.880            | 2.515               | 1.078            | 2.537               |
| <b>TS<sub>6-7</sub></b> | 3            | 2.47                    | 0.158            | -0.257              | 0.961            | 2.189               |
| <b>7</b>                | 5            | 2.44                    | 0.490            | 1.312               | 1.015            | 2.452               |

**Table S10.** Optimized M-M bond distances ( $\text{\AA}$ ), NBO charges ( $Q$  in terms of  $e$ ), and NBO spin density distributions ( $\rho$ ) in ground-state intermediates and transition states on H-Ni-DHKUST-1.

|                         | Multiplicity | $\ell_{\text{Ni1-Ni2}}$ | $Q_{\text{Ni1}}$ | $\rho_{\text{Ni1}}$ | $Q_{\text{Ni2}}$ | $\rho_{\text{Ni2}}$ |
|-------------------------|--------------|-------------------------|------------------|---------------------|------------------|---------------------|
| <b>1</b>                | 3            | 2.33                    | 0.507            | 0.427               | 0.986            | 1.432               |
| <b>2</b>                | $1_{os}$     | 2.58                    | 0.689            | -1.307              | 0.946            | 1.380               |
| <b>TS<sub>2-3</sub></b> | 3            | 2.41                    | 0.365            | 0.618               | 0.924            | 1.281               |
| <b>3</b>                | 3            | 2.35                    | 0.653            | 0.505               | 0.974            | 1.403               |
| <b>4</b>                | 3            | 2.36                    | 0.561            | 0.567               | 0.948            | 1.354               |
| <b>TS<sub>4-5</sub></b> | 3            | 2.47                    | 0.563            | 0.929               | 0.851            | 1.206               |
| <b>5</b>                | 3            | 2.42                    | 0.744            | 1.095               | 0.820            | 1.169               |
| <b>6</b>                | 3            | 2.43                    | 0.628            | 0.953               | 0.841            | 1.174               |
| <b>TS<sub>6-7</sub></b> | 3            | 2.42                    | 0.393            | 0.636               | 0.910            | 1.262               |
| <b>7</b>                | $1_{os}$     | 2.60                    | 0.717            | -1.333              | 0.945            | 1.394               |

**Table S11.** Optimized M-M bond distances ( $\text{\AA}$ ), NBO charges ( $Q$  in terms of  $e$ ), and NBO spin density distributions ( $\rho$ ) in ground-state intermediates and transition states on H-Cu-DHKUST-1.

|                         | Multiplicity | $\ell_{\text{Cu1-Cu2}}$ | $Q_{\text{Cu1}}$ | $\rho_{\text{Cu1}}$ | $Q_{\text{Cu2}}$ | $\rho_{\text{Cu2}}$ |
|-------------------------|--------------|-------------------------|------------------|---------------------|------------------|---------------------|
| <b>1</b>                | $1_{cs}$     | 2.41                    | 0.786            | 0.000               | 0.800            | 0.000               |
| <b>2</b>                | $1_{os}$     | 2.48                    | 0.661            | -0.173              | 0.804            | 0.173               |
| <b>TS<sub>2-3</sub></b> | $1_{os}$     | 2.5                     | 0.714            | -0.116              | 0.822            | 0.107               |
| <b>3</b>                | $1_{cs}$     | 2.53                    | 0.834            | 0.000               | 0.770            | 0.000               |
| <b>4</b>                | $1_{cs}$     | 2.57                    | 0.733            | 0.000               | 0.781            | 0.000               |
| <b>TS<sub>4-5</sub></b> | $1_{os}$     | 2.91                    | 0.675            | 0.069               | 0.840            | -0.259              |
| <b>5</b>                | $1_{cs}$     | 2.58                    | 0.837            | 0.000               | 0.744            | 0.000               |
| <b>6</b>                | $1_{cs}$     | 2.54                    | 0.835            | 0.000               | 0.770            | 0.000               |
| <b>TS<sub>6-7</sub></b> | $1_{os}$     | 2.51                    | 0.755            | -0.227              | 0.813            | 0.188               |
| <b>7</b>                | $1_{os}$     | 2.49                    | 0.665            | -0.147              | 0.796            | 0.148               |



**Table S12.** Optimized M-M bond distances ( $\text{\AA}$ ), NBO charges ( $Q$  in terms of  $e$ ), and NBO spin density distributions ( $\rho$ ) in ground-state intermediates and transition states on H-Ru-DHKUST-1.

|                         | Multiplicity | $\ell_{\text{Ru1-Ru2}}$ | $Q_{\text{Ru1}}$ | $\rho_{\text{Ru1}}$ | $Q_{\text{Ru2}}$ | $\rho_{\text{Ru2}}$ |
|-------------------------|--------------|-------------------------|------------------|---------------------|------------------|---------------------|
| <b>1</b>                | 5            | 2.25                    | 0.435            | 1.428               | 0.873            | 2.374               |
| <b>2</b>                | 5            | 2.32                    | 0.041            | 0.952               | 0.921            | 2.776               |
| <b>TS<sub>2-3</sub></b> | 5            | 2.40                    | 0.030            | 0.800               | 0.898            | 2.923               |
| <b>3</b>                | 3            | 2.24                    | 0.591            | 1.172               | 0.834            | 0.870               |
| <b>4</b>                | 3            | 2.36                    | 0.321            | 0.915               | 0.560            | 1.044               |
| <b>TS<sub>4-5</sub></b> | 5            | 2.39                    | 0.201            | 0.913               | 0.820            | 2.795               |
| <b>5</b>                | 5            | 2.42                    | 0.353            | 0.844               | 0.815            | 2.913               |
| <b>6</b>                | 5            | 2.43                    | 0.213            | 0.825               | 0.833            | 2.918               |
| <b>TS<sub>6-7</sub></b> | 5            | 2.40                    | 0.053            | 0.829               | 0.889            | 2.906               |
| <b>7</b>                | 5            | 2.30                    | 0.102            | 1.068               | 0.903            | 2.693               |

**Table S13.** Optimized M-M bond distances ( $\text{\AA}$ ), NBO charges ( $Q$  in terms of  $e$ ), and NBO spin density distributions ( $\rho$ ) in ground-state intermediates and transition states on H-Rh-DHKUST-1.

|                         | Multiplicity | $\ell_{\text{Rh1-Rh2}}$ | $Q_{\text{Rh1}}$ | $\rho_{\text{Rh1}}$ | $Q_{\text{Rh2}}$ | $\rho_{\text{Rh2}}$ |
|-------------------------|--------------|-------------------------|------------------|---------------------|------------------|---------------------|
| <b>1</b>                | $1_{cs}$     | 2.40                    | 0.363            | 0.000               | 0.808            | 0.000               |
| <b>2</b>                | $1_{cs}$     | 2.47                    | 0.124            | 0.000               | 0.718            | 0.000               |
| <b>TS<sub>2-3</sub></b> | 3            | 2.64                    | 0.189            | -0.045              | 0.777            | 1.815               |
| <b>3</b>                | 3            | 2.37                    | 0.583            | 0.567               | 0.829            | 1.257               |
| <b>4</b>                | $1_{cs}$     | 2.42                    | 0.369            | 0.000               | 0.529            | 0.000               |
| <b>TS<sub>4-5</sub></b> | 3            | 2.71                    | 0.349            | -0.011              | 0.732            | 1.803               |
| <b>5</b>                | 3            | 2.73                    | 0.418            | -0.002              | 0.722            | 1.813               |
| <b>6</b>                | 3            | 2.69                    | 0.323            | -0.026              | 0.740            | 1.813               |
| <b>TS<sub>6-7</sub></b> | 3            | 2.65                    | 0.212            | -0.041              | 0.770            | 1.815               |
| <b>7</b>                | $1_{cs}$     | 2.48                    | 0.131            | 0.000               | 0.714            | 0.000               |

**Table S14.** Optimized M-M bond distances ( $\text{\AA}$ ), NBO charges ( $Q$  in terms of  $e$ ), and NBO spin density distributions ( $\rho$ ) in ground-state intermediates and transition states on H-Pd-DHKUST-1.

|                         | Multiplicity    | $\ell_{\text{Pd1-Pd2}}$ | $Q_{\text{Pd1}}$ | $\rho_{\text{Pd1}}$ | $Q_{\text{Pd2}}$ | $\rho_{\text{Pd2}}$ |
|-------------------------|-----------------|-------------------------|------------------|---------------------|------------------|---------------------|
| <b>1</b>                | 3               | 2.54                    | 0.473            | 0.395               | 0.815            | 1.166               |
| <b>2</b>                | 3               | 2.56                    | 0.348            | 0.446               | 0.770            | 1.066               |
| <b>TS<sub>2-3</sub></b> | 3               | 2.59                    | 0.355            | 0.526               | 0.713            | 0.928               |
| <b>3</b>                | 3               | 2.54                    | 0.627            | 0.414               | 0.804            | 1.139               |
| <b>4</b>                | 3               | 2.58                    | 0.530            | 0.457               | 0.773            | 1.070               |
| <b>TS<sub>4-5</sub></b> | 3               | 2.62                    | 0.512            | 0.609               | 0.657            | 0.822               |
| <b>5</b>                | 3               | 2.60                    | 0.667            | 0.679               | 0.636            | 0.780               |
| <b>6</b>                | 1 <sub>os</sub> | 2.55                    | 0.606            | 0.332               | 0.766            | -0.182              |
| <b>TS<sub>6-7</sub></b> | 3               | 2.60                    | 0.379            | 0.532               | 0.703            | 0.904               |
| <b>7</b>                | 3               | 2.57                    | 0.361            | 0.440               | 0.763            | 1.054               |

## S5. Gibbs energies at different multiplicities

**Table S15.** Gibbs energies  $G$  (Hartree) and relative Gibbs energies  $\Delta G$  (kcal/mol) at 298.15 K on H-Co-DHKUST-1. The ground-state  $\Delta G$  are bold.

| H-Co-DHKUST-1           | Open-shell singlet |            | Triplet      |              | Quintet      |              | Septet       |              |
|-------------------------|--------------------|------------|--------------|--------------|--------------|--------------|--------------|--------------|
|                         | $G$                | $\Delta G$ | $G$          | $\Delta G$   | $G$          | $\Delta G$   | $G$          | $\Delta G$   |
| <b>1</b>                | -4578.574581       | 20.8       | -4578.60021  | 4.8          | -4578.607781 | <b>0.0</b>   | -4578.604964 | 1.8          |
| <b>2</b>                | -4657.101661       | -6.7       | -4657.101499 | -6.6         | -4657.102342 | <b>-7.2</b>  | -4657.101001 | -6.3         |
| <b>TS<sub>2-3</sub></b> | -4657.076017       | 9.4        | -4657.100932 | <b>-6.3</b>  | -4657.094476 | -2.2         | -4657.094492 | -2.2         |
| <b>3</b>                | -4657.094451       | -2.2       | -4657.117409 | -16.6        | -4657.130826 | <b>-25.0</b> | -4657.127440 | -22.9        |
| <b>4</b>                | -4735.597776       | -14.9      | -4735.604811 | -19.3        | -4735.611596 | <b>-23.5</b> | -4735.605480 | -19.7        |
| <b>TS<sub>4-5</sub></b> | -4735.543087       | 19.5       | -4735.580879 | <b>-4.3</b>  | -4735.576177 | -1.3         | -4735.571910 | 1.4          |
| <b>5</b>                | -4735.569227       | 3.1        | -4735.613223 | -24.5        | -4735.630779 | -35.6        | -4735.636708 | <b>-39.3</b> |
| <b>6</b>                | -4735.585011       | -6.8       | -4735.620982 | -29.4        | -4735.637492 | -32.7        | -4735.631169 | <b>-35.8</b> |
| <b>TS<sub>6-7</sub></b> | -4735.583972       | -6.2       | -4735.614655 | <b>-25.4</b> | -4735.60594  | -20.0        | -4735.608296 | -21.5        |
| <b>7</b>                | -4735.590903       | -10.5      | -4735.615607 | -26.0        | -4735.618159 | <b>-27.6</b> | -4735.615375 | -25.9        |
| <b>8</b>                | -4735.571554       | 1.6        | -4735.597183 | -14.5        | -4735.604754 | <b>-19.2</b> | -4735.601937 | -17.5        |

**Table S16.** Gibbs energies  $G$  (Hartree) and relative Gibbs energies  $\Delta G$  (kcal/mol) at 298.15 K on H-Ni-DHKUST-1. The ground-state  $\Delta G$  are bold.

| H-Ni-DHKUST-1           | Open-shell singlet |              | Triplet      |              | Quintet      |            |
|-------------------------|--------------------|--------------|--------------|--------------|--------------|------------|
|                         | $G$                | $\Delta G$   | $G$          | $\Delta G$   | $G$          | $\Delta G$ |
| <b>1</b>                | -4829.701308       | 11.1         | -4829.71897  | <b>0.0</b>   | -4829.698732 | 12.7       |
| <b>2</b>                | -4908.206225       | <b>-2.6</b>  | -4908.204802 | -1.7         | -4908.192149 | 6.3        |
| <b>TS<sub>2-3</sub></b> | -4908.195303       | 4.3          | -4908.198781 | <b>2.1</b>   | -4908.185044 | 10.7       |
| <b>3</b>                | -4908.220225       | -11.4        | -4908.236986 | <b>-21.9</b> | -4908.209759 | -4.8       |
| <b>4</b>                | -4986.702126       | -10.6        | -4986.717848 | <b>-20.4</b> | -4986.674985 | 6.5        |
| <b>TS<sub>4-5</sub></b> | -4986.676181       | 5.7          | -4986.681963 | <b>2.1</b>   | -4986.653301 | 20.1       |
| <b>5</b>                | -4986.725624       | -25.3        | -4986.729564 | <b>-27.8</b> | -4986.718093 | -20.6      |
| <b>6</b>                | -4986.724294       | -24.5        | -4986.727446 | <b>-26.5</b> | -4986.714461 | -18.3      |
| <b>TS<sub>6-7</sub></b> | -4986.707442       | -13.9        | -4986.711603 | <b>-16.5</b> | -4986.700005 | -9.2       |
| <b>7</b>                | -4986.721622       | <b>-22.8</b> | -4986.718983 | -21.1        | -4986.708715 | -14.7      |
| <b>8</b>                | -4986.698281       | -8.2         | -4986.715943 | <b>-19.2</b> | -4986.695705 | -6.5       |

**Table S17.** Gibbs energies  $G$  (Hartree) and relative Gibbs energies  $\Delta G$  (kcal/mol) at 298.15 K on H-Cu-DHKUST-1. The ground-state  $\Delta G$  are bold.

| H-Cu-DHKUST-1           | Closed-shell singlet |              | Open-shell singlet |              | Triplet      |            |
|-------------------------|----------------------|--------------|--------------------|--------------|--------------|------------|
|                         | $G$                  | $\Delta G$   | $G$                | $\Delta G$   | $G$          | $\Delta G$ |
| <b>1</b>                | -5094.034373         | <b>0.0</b>   | -                  | -            | -5094.010025 | 15.3       |
| <b>2</b>                | -5172.524994         | -4.7         | -5172.525355       | <b>-4.9</b>  | -5172.504878 | 7.9        |
| <b>TS<sub>2-3</sub></b> | -                    | -            | -5172.496033       | <b>13.5</b>  | -5172.488658 | 18.1       |
| <b>3</b>                | -5172.544082         | <b>-16.7</b> | -                  | -            | -5172.525756 | -5.2       |
| <b>4</b>                | -5251.029195         | <b>-17.9</b> | -                  | -            | -5251.010752 | -6.3       |
| <b>TS<sub>4-5</sub></b> | -5250.990767         | 6.2          | -5250.992953       | <b>4.9</b>   | -5250.989711 | 6.9        |
| <b>5</b>                | -5251.057863         | <b>-35.9</b> | -                  | -            | -5251.035971 | -22.1      |
| <b>6</b>                | -5251.055532         | <b>-34.4</b> | -                  | -            | -5251.034244 | -21.1      |
| <b>TS<sub>6-7</sub></b> | -5251.009696         | -5.6         | -5251.010184       | <b>-6.0</b>  | -5251.004728 | -2.5       |
| <b>7</b>                | -5251.042143         | -26.0        | -5251.042563       | <b>-26.3</b> | -5251.021828 | -13.3      |
| <b>8</b>                | -5251.031346         | <b>-19.2</b> | -                  | -            | -5251.006998 | -4.0       |

**Table S18.** Gibbs energies  $G$  (Hartree) and relative Gibbs energies  $\Delta G$  (kcal/mol) at 298.15 K on H-Ru-DHKUST-1. The ground-state  $\Delta G$  are bold.

| H-Ru-DHKUST-1           | Open-shell singlet |            | Triplet      |              | Quintet      |              | Septet       |            |
|-------------------------|--------------------|------------|--------------|--------------|--------------|--------------|--------------|------------|
|                         | $G$                | $\Delta G$ | $G$          | $\Delta G$   | $G$          | $\Delta G$   | $G$          | $\Delta G$ |
| <b>1</b>                | -2002.991456       | 14.9       | -2003.00190  | 8.3          | -2003.015168 | <b>0.0</b>   | -2002.985543 | 18.6       |
| <b>2</b>                | -2081.491919       | 4.0        | -2081.504834 | -4.1         | -2081.511465 | <b>-8.2</b>  | -2081.462688 | 22.4       |
| <b>TS<sub>2-3</sub></b> | -2081.484517       | 8.7        | -2081.492584 | 3.6          | -2081.503961 | <b>-3.5</b>  | -2081.458785 | 24.8       |
| <b>3</b>                | -2081.504530       | -3.9       | -2081.515317 | <b>-10.7</b> | -2081.508824 | -6.6         | -2081.501185 | -1.8       |
| <b>4</b>                | -2160.018816       | -23.4      | -2160.026104 | <b>-28.0</b> | -2160.014936 | -21.0        | -2159.969193 | 7.7        |
| <b>TS<sub>4-5</sub></b> | -2159.948358       | 20.8       | -2159.957012 | 15.4         | -2159.966653 | <b>9.3</b>   | -2159.935851 | 28.6       |
| <b>5</b>                | -2159.987221       | -3.6       | -2159.992363 | -6.8         | -2160.003614 | <b>-13.9</b> | -2159.988221 | -4.2       |
| <b>6</b>                | -2159.996378       | -9.3       | -2160.007156 | -16.1        | -2160.017325 | <b>-22.5</b> | -2160.008990 | -17.3      |
| <b>TS<sub>6-7</sub></b> | -2159.994615       | -8.2       | -2160.005869 | -15.3        | -2160.014799 | <b>-20.9</b> | -2159.965404 | 10.1       |
| <b>7</b>                | -2160.003232       | -13.6      | -2160.016330 | -21.9        | -2160.024412 | <b>-26.9</b> | -2159.970171 | 7.1        |
| <b>8</b>                | -2002.991456       | -4.4       | -2003.001900 | -10.9        | -2003.015168 | <b>-19.2</b> | -2002.985543 | -0.6       |

**Table S19.** Gibbs energies  $G$  (Hartree) and relative Gibbs energies  $\Delta G$  (kcal/mol) at 298.15 K on H-Rh-DHKUST-1. The ground-state  $\Delta G$  are bold.

| H-Rh-DHKUST-1           | Closed-shell singlet |              | Triplet      |              | Quintet      |            |
|-------------------------|----------------------|--------------|--------------|--------------|--------------|------------|
|                         | $G$                  | $\Delta G$   | $G$          | $\Delta G$   | $G$          | $\Delta G$ |
| <b>1</b>                | -2034.339756         | <b>0.0</b>   | -2034.337955 | 1.1          | -2034.328038 | 7.4        |
| <b>2</b>                | -2112.852553         | <b>-18.6</b> | -2112.850043 | -17.0        | -2112.81282  | 6.3        |
| <b>TS<sub>2-3</sub></b> | -2112.842169         | -12.1        | -2112.843745 | <b>-13.1</b> | -2112.810897 | 7.5        |
| <b>3</b>                | -2112.840255         | -10.9        | -2112.852563 | <b>-18.6</b> | -2112.846198 | -14.6      |
| <b>4</b>                | -2191.37350          | <b>-42.3</b> | -2191.352584 | -29.2        | -2191.327055 | -13.2      |
| <b>TS<sub>4-5</sub></b> | -2191.30394          | 1.3          | -2191.310383 | <b>-2.7</b>  | -2191.279439 | 16.7       |
| <b>5</b>                | -2191.333929         | -17.5        | -2191.345271 | <b>-24.6</b> | -2191.336031 | -18.8      |
| <b>6</b>                | -2191.351142         | -28.3        | -2191.354935 | <b>-30.7</b> | -2191.327019 | -13.1      |
| <b>TS<sub>6-7</sub></b> | -2191.349845         | -27.5        | -2191.354755 | <b>-30.5</b> | -2191.321693 | -9.8       |
| <b>7</b>                | -2191.365326         | <b>-37.2</b> | -2191.362681 | -35.5        | -2191.327660 | -13.5      |
| <b>8</b>                | -2191.336729         | <b>-19.2</b> | -2191.334928 | -18.1        | -2191.325011 | -11.9      |



**Table S20.** Gibbs energies  $G$  (Hartree) and relative Gibbs energies  $\Delta G$  (kcal/mol) at 298.15 K on H-Pd-DHKUST-1. The ground-state  $\Delta G$  are bold.

| H-Pd-DHKUST-1           | Open-shell singlet |              | Triplet      |              |
|-------------------------|--------------------|--------------|--------------|--------------|
|                         | $G$                | $\Delta G$   | $G$          | $\Delta G$   |
| <b>1</b>                | -2069.029769       | 0.5          | -2069.030625 | <b>0.0</b>   |
| <b>2</b>                | -2147.516961       | -2.0         | -2147.519436 | <b>-3.5</b>  |
| <b>TS<sub>2-3</sub></b> | -2147.508144       | 3.5          | -2147.510833 | <b>1.9</b>   |
| <b>3</b>                | -2147.530799       | -10.7        | -2147.532116 | <b>-11.5</b> |
| <b>4</b>                | -2226.027841       | -19.4        | -2226.031976 | <b>-22.0</b> |
| <b>TS<sub>4-5</sub></b> | -2225.982212       | 9.2          | -2225.984178 | <b>8.0</b>   |
| <b>5</b>                | -2226.034709       | -23.7        | -2226.037496 | <b>-25.4</b> |
| <b>6</b>                | -2226.053849       | <b>-35.7</b> | -2226.037418 | -25.4        |
| <b>TS<sub>6-7</sub></b> | -2226.020107       | -14.5        | -2226.023289 | <b>-16.5</b> |
| <b>7</b>                | -2226.030270       | -20.9        | -2226.032720 | <b>-22.4</b> |
| <b>8</b>                | -2226.026742       | -18.7        | -2226.027598 | <b>-19.2</b> |

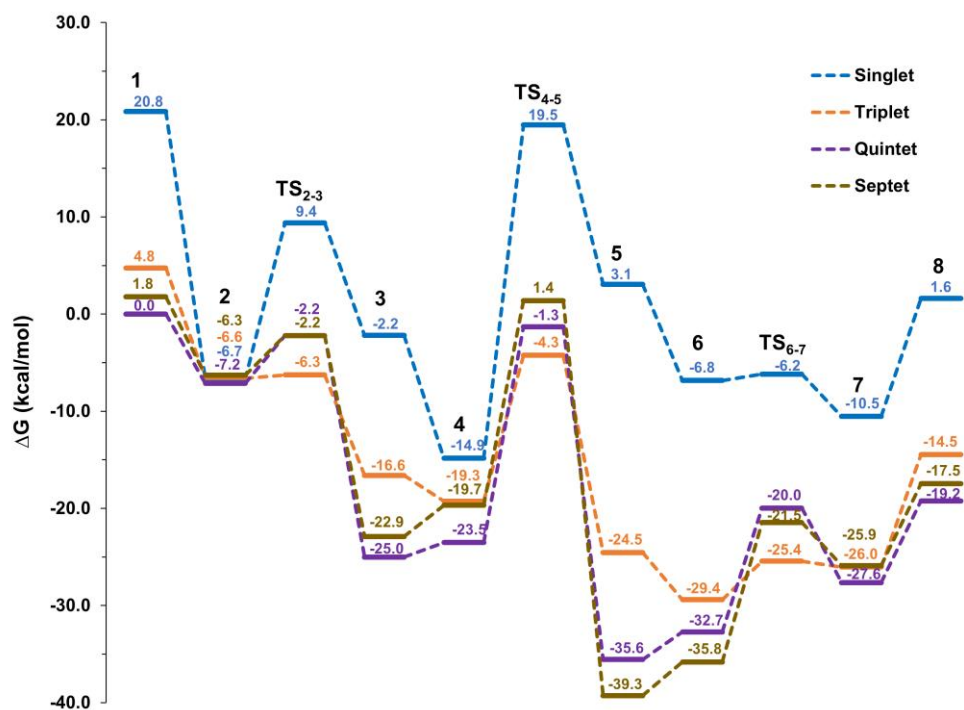

Fig. S2.  $\Delta G$  at different multiplicities on H-Co-DHKUST-1 at 298.15 K.

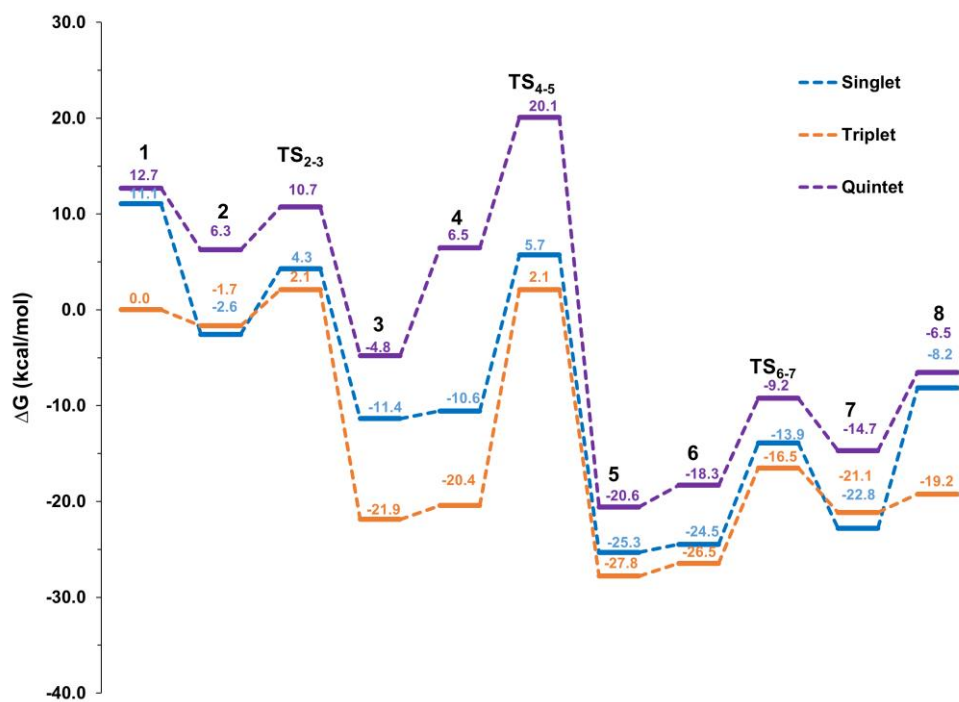

Fig. S3.  $\Delta G$  at different multiplicities on H-Ni-DHKUST-1 at 298.15 K.

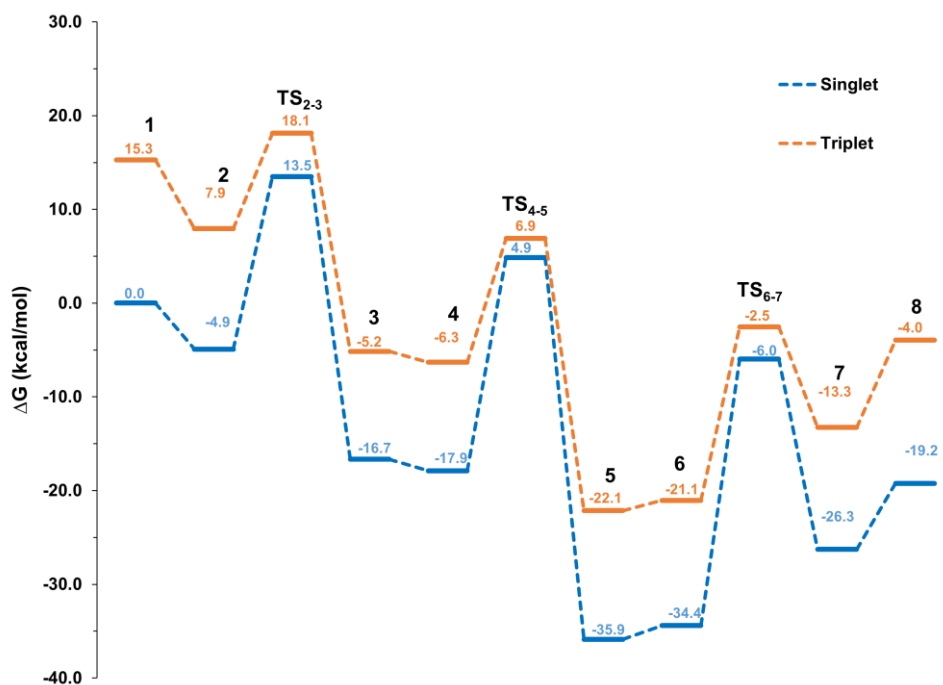

Fig. S4.  $\Delta G$  at different multiplicities on H-Cu-DHKUST-1 at 298.15 K.

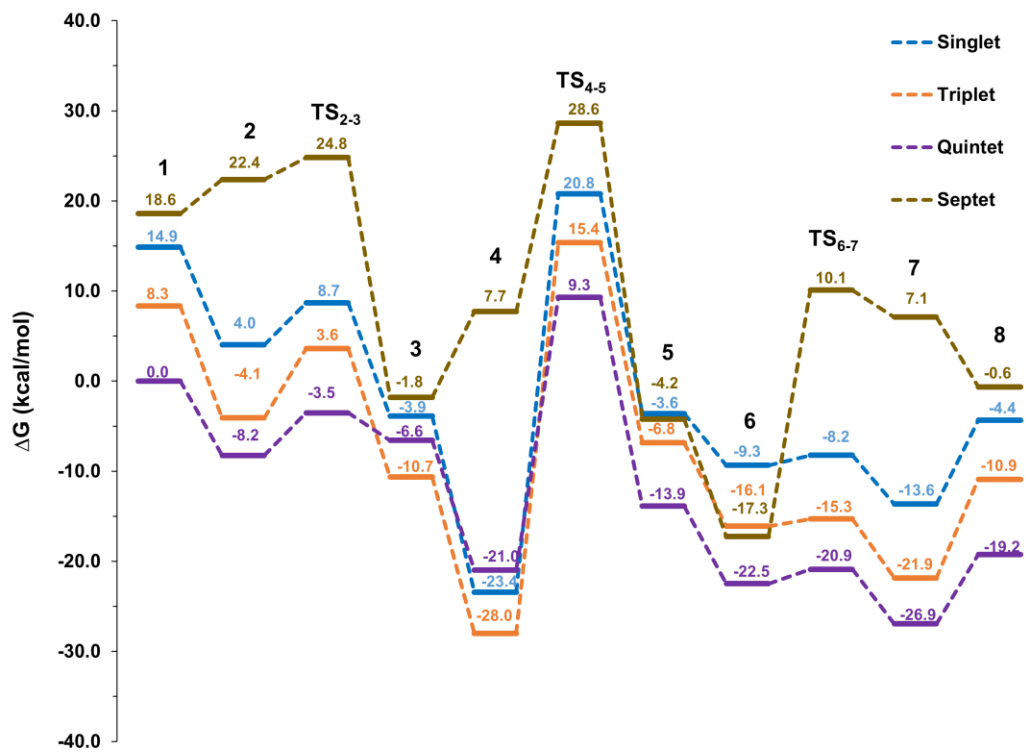

Fig. S5.  $\Delta G$  at different multiplicities on H-Ru-DHKUST-1 at 298.15 K.

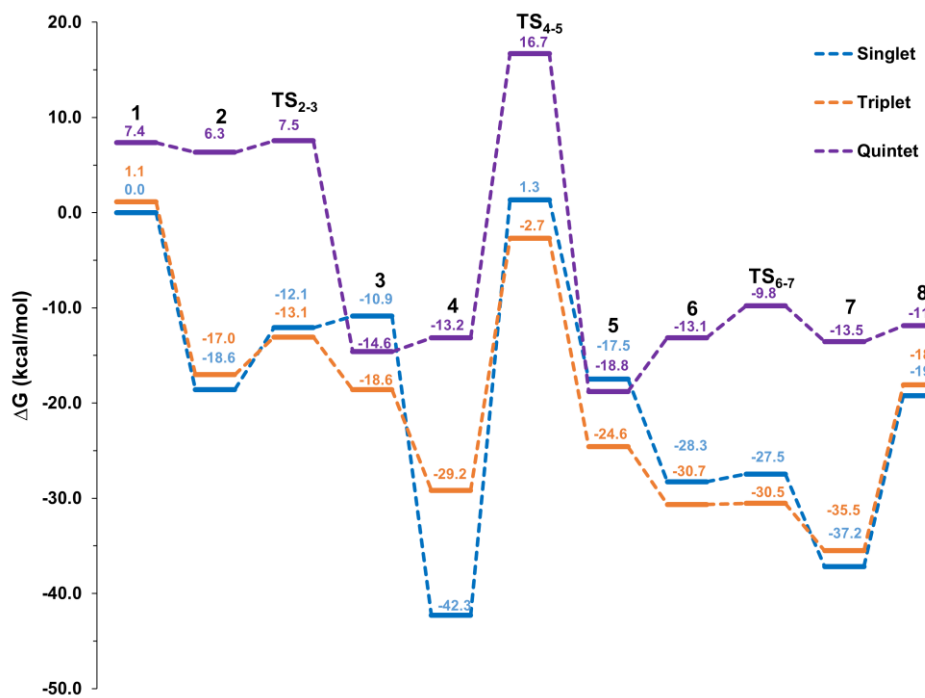

Fig. S6.  $\Delta G$  at different multiplicities on H-Rh-DHKUST-1 at 298.15 K.

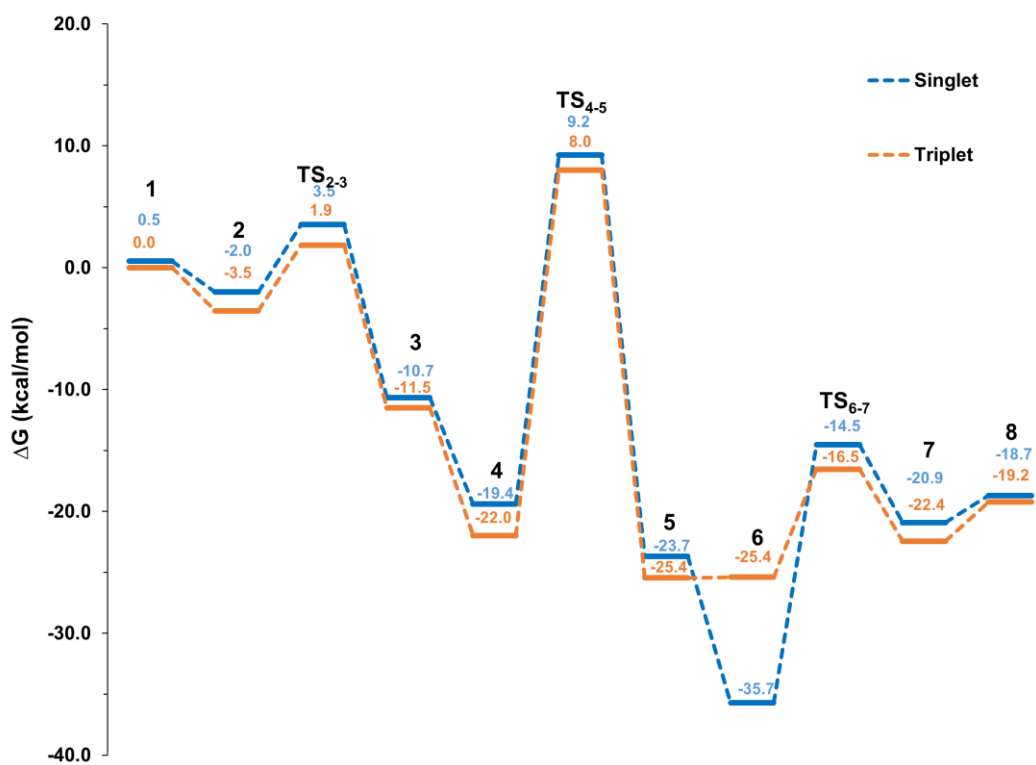

Fig. S7.  $\Delta G$  at different multiplicities on H-Pd-DHKUST-1 at 298.15 K.

## S6. Frequencies and structures of transition states.

**Table S21.** Imaginary frequencies ( $\text{cm}^{-1}$ ) of transition states.

| Step                   | H-Co-<br>DHKUST-1 | H-Ni-<br>DHKUST-1 | H-Cu-<br>DHKUST-1 | H-Ru-<br>DHKUST-1 | H-Rh-<br>DHKUST-1 | H-Pd-<br>DHKUST-1 |
|------------------------|-------------------|-------------------|-------------------|-------------------|-------------------|-------------------|
| Hydrogenation          | -631.6            | -765.8            | -620.9            | -599.1            | -507.2            | -768.6            |
| C-C coupling           | -388.0            | -458.9            | -435.5            | -504.8            | -441.8            | -451.2            |
| $\beta$ -H elimination | -557.9            | -673.6            | -425.1            | -541.5            | -447.0            | -693.5            |

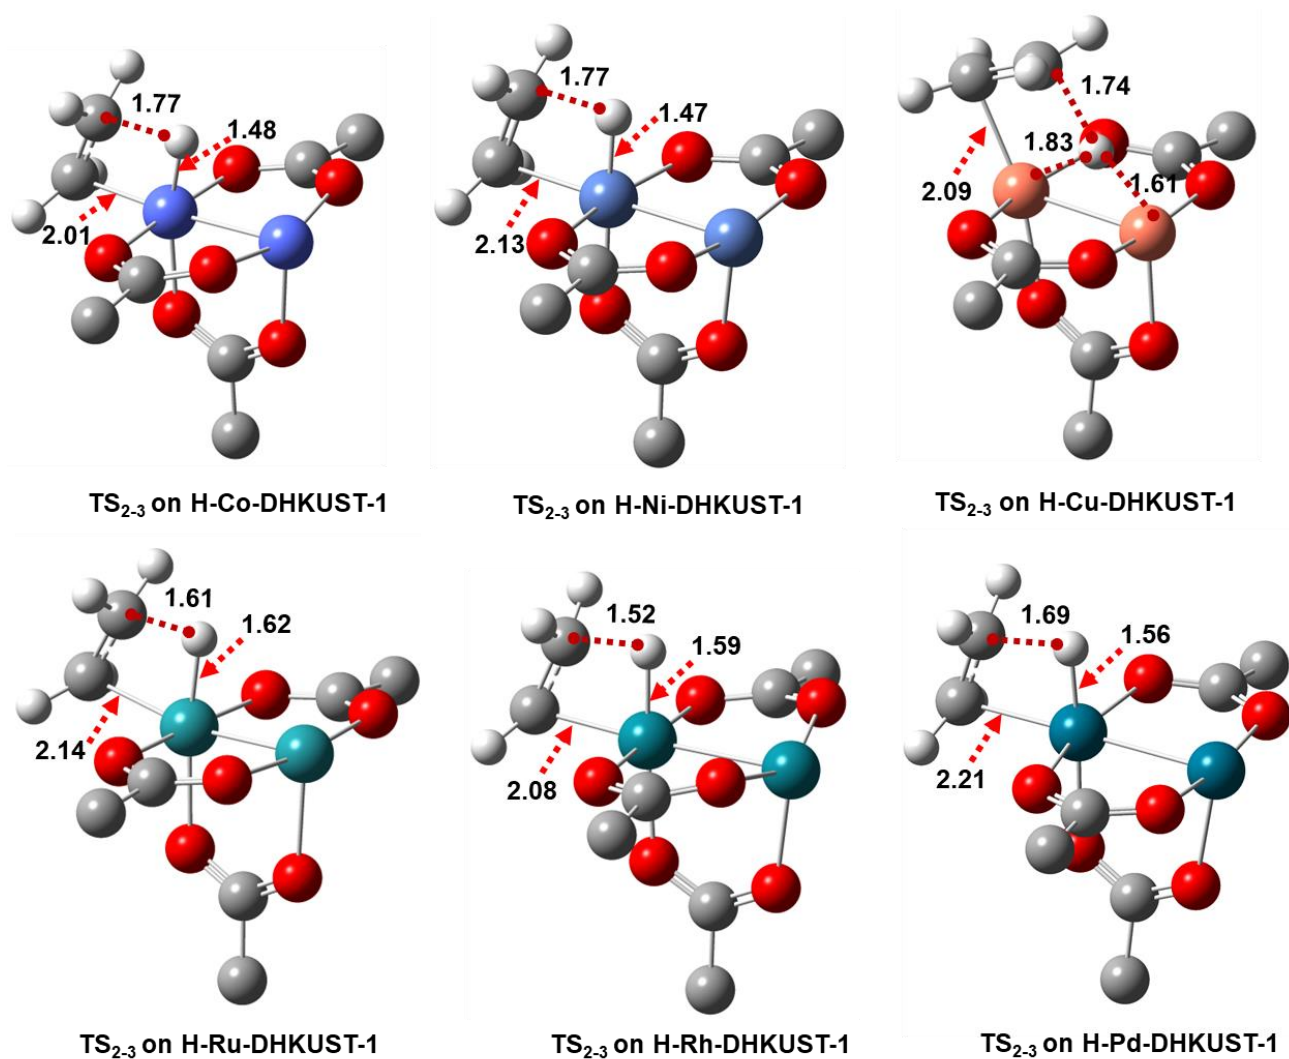

**Fig. S8.** Optimized structures and key bond distances (Å) of hydrogenation transition state (TS<sub>2-3</sub>) on H-M-DHKUST-1. Carbon, oxygen, and hydrogen atoms are in grey, red, and white, respectively.

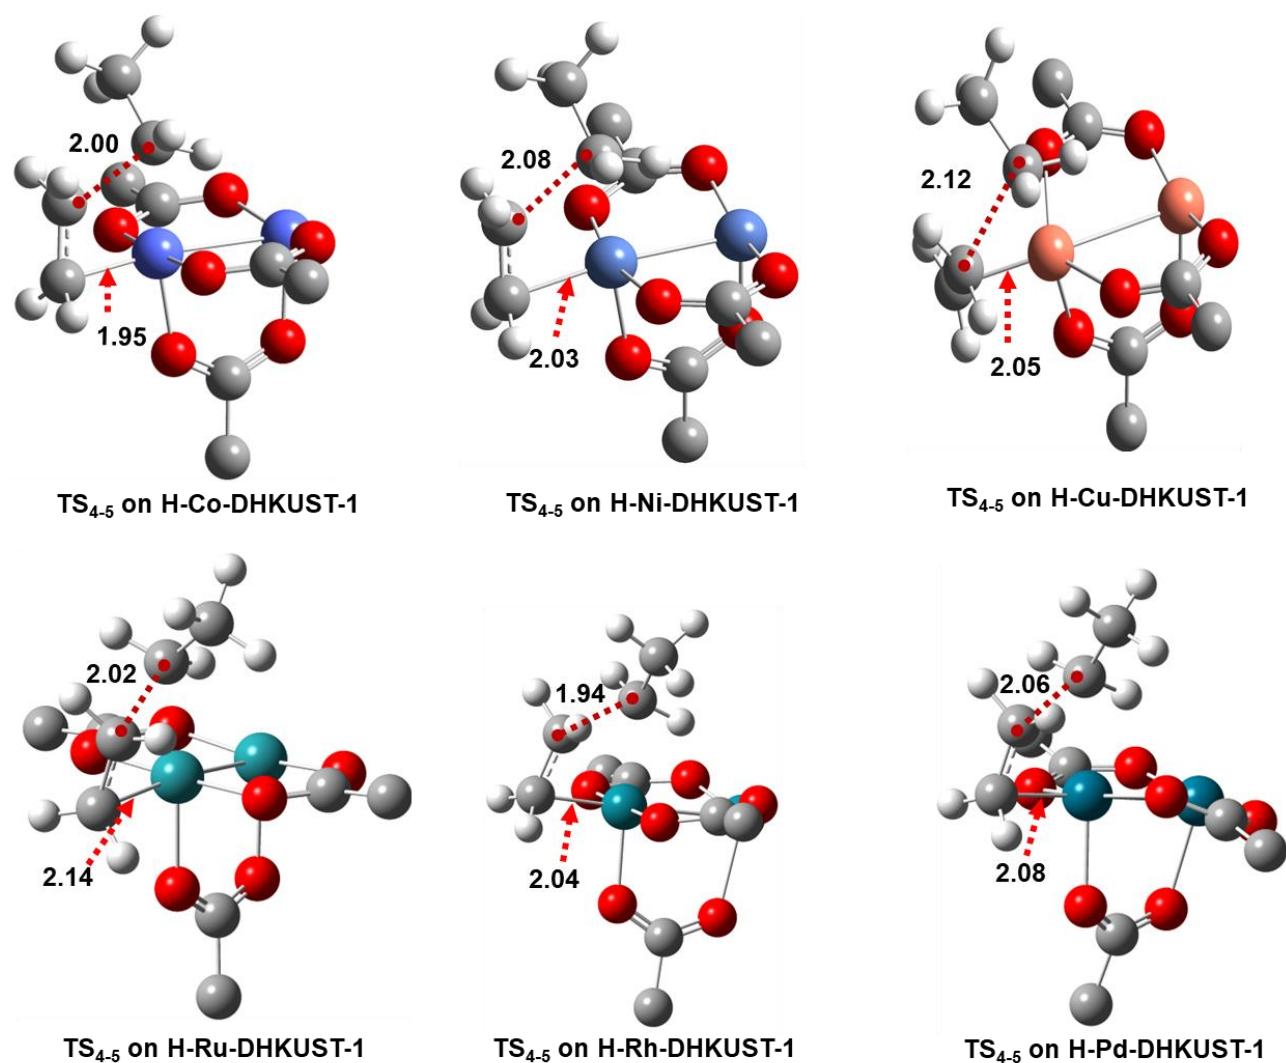

**Fig. S9.** Optimized structures and key bond distances (Å) of C-C coupling transition state (TS<sub>4-5</sub>) on H-M-DHKUST-1. Carbon, oxygen, and hydrogen atoms are in grey, red, and white, respectively.

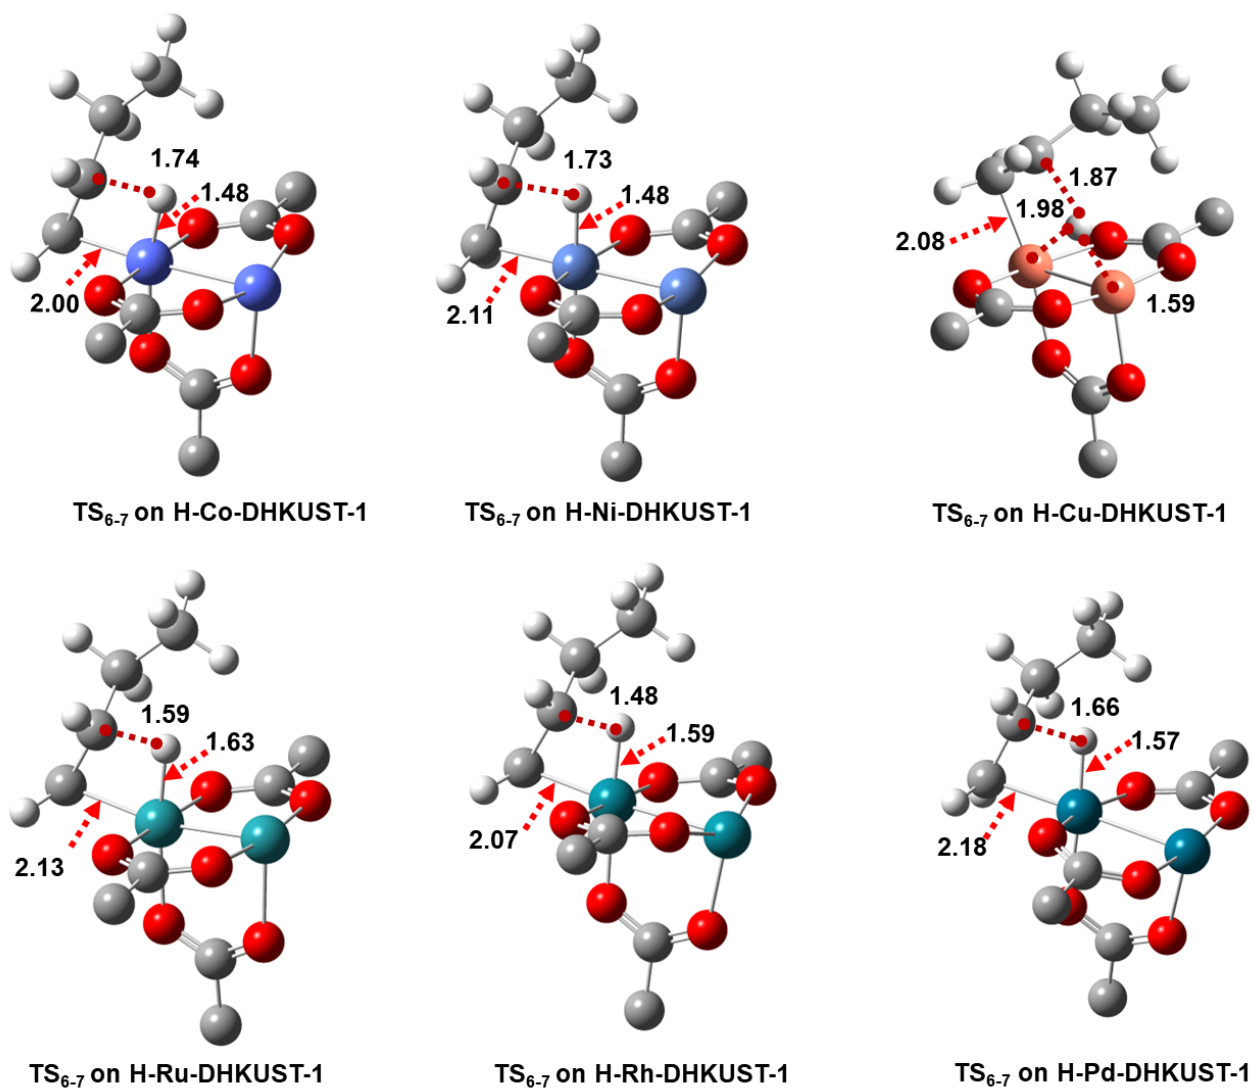

**Fig. S10.** Optimized structures and key bond distances (Å) of  $\beta$ -H elimination transition state (TS<sub>6-7</sub>) on H-M-DHKUST-1. Carbon, oxygen, and hydrogen atoms are in grey, red, and white, respectively.



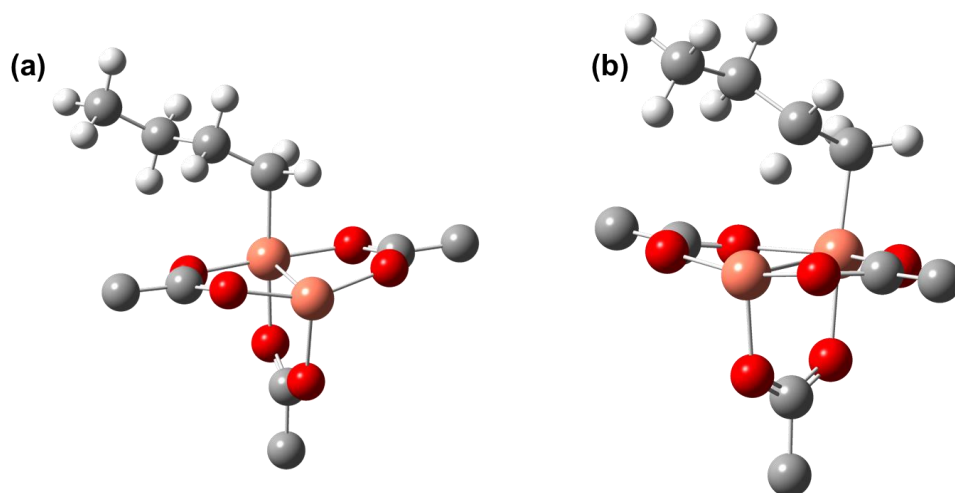

**Fig. S11.** Optimized structures of intermediate **6** on H-Cu-DHKUST-1 with different multiplicities (a) closed-shell singlet and (b) triplet. Carbon, oxygen, and hydrogen atoms are in grey, red, and white, respectively.

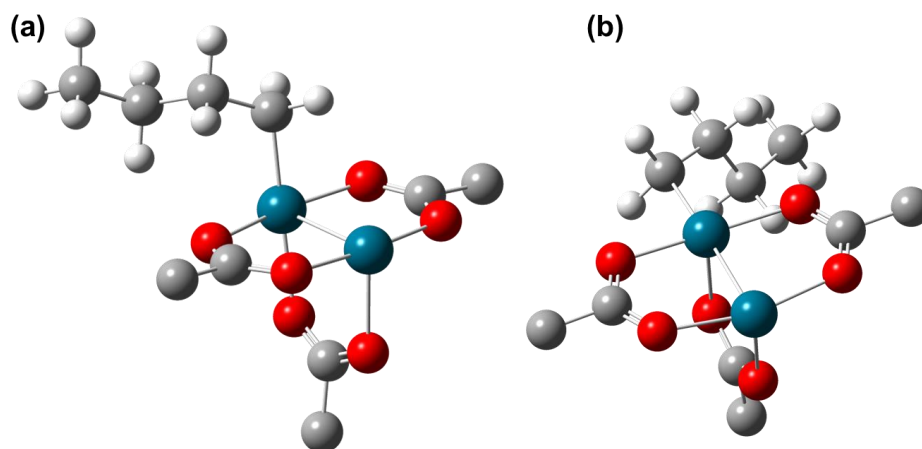

**Fig. S12.** Optimized structures of intermediate **6** on H-Pd-DHKUST-1 with different multiplicities (a) open-shell singlet and (b) triplet. Carbon, oxygen, and hydrogen atoms are in grey, red, and white, respectively.

## S7. Coordinates of intermediates and transition states at ground state

### H-Co-DHKUST-1

INT1

0 5

|    |             |             |             |
|----|-------------|-------------|-------------|
| O  | 0.00040800  | 0.76658300  | -1.23137100 |
| C  | -0.00076500 | 1.30702100  | -0.08867600 |
| O  | -0.00149100 | 0.67945600  | 1.00901000  |
| O  | -1.89105100 | -1.39839100 | 1.10766400  |
| C  | -2.48593000 | -1.49985900 | -0.00728800 |
| O  | -1.89012400 | -1.53039300 | -1.12419800 |
| O  | 1.89082200  | -1.53059900 | -1.12407600 |
| C  | 2.48662000  | -1.50021700 | -0.00719300 |
| O  | 1.89152800  | -1.39908000 | 1.10777700  |
| C  | 3.97106900  | -1.54920100 | 0.01260200  |
| C  | 4.69015800  | -1.55078300 | -1.18577300 |
| C  | 4.64777500  | -1.55411300 | 1.23602300  |
| C  | 6.09263000  | -1.55053500 | -1.16261700 |
| C  | 6.04929700  | -1.56088400 | 1.26427400  |
| C  | 6.77334700  | -1.55761500 | 0.06351900  |
| H  | 4.15385800  | -1.54143400 | -2.13542900 |
| H  | 4.07672000  | -1.54627000 | 2.16502100  |
| H  | 7.86384600  | -1.55531200 | 0.08259500  |
| C  | -3.97039700 | -1.54919500 | 0.01241900  |
| C  | -4.64712600 | -1.55485300 | 1.23581400  |
| C  | -4.68942300 | -1.55067800 | -1.18597300 |
| C  | -6.04864500 | -1.56232300 | 1.26402600  |
| C  | -6.09189400 | -1.55103900 | -1.16286400 |
| C  | -6.77265100 | -1.55892400 | 0.06324700  |
| H  | -4.07609100 | -1.54710400 | 2.16482800  |
| H  | -4.15308700 | -1.54077600 | -2.13560300 |
| H  | -7.86315200 | -1.55713500 | 0.08228900  |
| C  | -0.00111300 | 2.79664400  | -0.02950600 |
| C  | -0.00149400 | 3.44614300  | 1.20619900  |
| C  | -0.00072800 | 3.54115500  | -1.21060000 |
| C  | -0.00146700 | 4.84683600  | 1.26310800  |
| C  | -0.00077600 | 4.94209000  | -1.15823200 |
| C  | -0.00111500 | 5.59799700  | 0.08022500  |
| H  | -0.00176400 | 2.85366100  | 2.12187600  |
| H  | -0.00038700 | 3.02193300  | -2.16970000 |
| H  | -0.00110300 | 6.68775400  | 0.12318300  |
| C  | -0.00044100 | 5.70390600  | -2.36718800 |
| C  | -6.83356000 | -1.52757000 | -2.38656300 |
| C  | -0.00170900 | 5.50898000  | 2.52902300  |
| C  | -6.73796200 | -1.56124300 | 2.51806300  |
| C  | 6.73857800  | -1.55888200 | 2.51832900  |
| C  | 6.83433200  | -1.52725200 | -2.38630300 |
| N  | 0.00005300  | 6.32312700  | -3.35318200 |
| N  | -0.00159100 | 6.04275100  | 3.56360800  |
| N  | -7.44174000 | -1.49896900 | -3.37974500 |
| N  | -7.29248700 | -1.55618400 | 3.54243500  |
| N  | 7.29308800  | -1.55280800 | 3.54270700  |
| N  | 7.44249900  | -1.49848200 | -3.37949900 |
| Co | 0.00048400  | -1.30312000 | 1.06533000  |
| Co | 0.00041000  | -1.22237200 | -1.38520300 |
| H  | -0.00211400 | -2.79731500 | 1.05622800  |

## INT2

0 5

|    |             |             |             |
|----|-------------|-------------|-------------|
| O  | -0.00029700 | 0.69353500  | -1.28181800 |
| C  | -0.00088300 | 1.17266300  | -0.11680300 |
| O  | 0.00458600  | 0.48096200  | 0.94683200  |
| O  | -1.93688000 | -1.66673600 | 1.27747700  |
| C  | -2.52136900 | -1.43703000 | 0.17457200  |
| O  | -1.94300900 | -1.29175900 | -0.93682000 |
| O  | 1.95493700  | -1.28230500 | -0.93649300 |
| C  | 2.53529100  | -1.42569700 | 0.17417500  |
| O  | 1.95333700  | -1.65860500 | 1.27767200  |
| C  | 4.01777700  | -1.30751800 | 0.19223200  |
| C  | 4.72469800  | -1.10975900 | -0.99617800 |
| C  | 4.69740100  | -1.37257100 | 1.40882100  |
| C  | 6.12028300  | -0.97975800 | -0.96732800 |
| C  | 6.09079400  | -1.23203100 | 1.44170200  |
| C  | 6.80624100  | -1.03839700 | 0.25366400  |
| H  | 4.18241800  | -1.05468100 | -1.94070700 |
| H  | 4.13524800  | -1.52534800 | 2.33050900  |
| H  | 7.89114600  | -0.92993800 | 0.27797400  |
| C  | -4.00434300 | -1.32516500 | 0.19546200  |
| C  | -4.68030500 | -1.39947900 | 1.41348300  |
| C  | -4.71547800 | -1.12396200 | -0.98997300 |
| C  | -6.07408500 | -1.26529700 | 1.45120500  |
| C  | -6.11158700 | -0.99944500 | -0.95624700 |
| C  | -6.79376300 | -1.06786100 | 0.26644400  |
| H  | -4.11492100 | -1.55469200 | 2.33274900  |
| H  | -4.17623700 | -1.06161900 | -1.93580600 |
| H  | -7.87902400 | -0.96394800 | 0.29441000  |
| C  | -0.00993900 | 2.66049500  | 0.00853300  |
| C  | -0.00044300 | 3.29369100  | 1.25448500  |
| C  | -0.02969500 | 3.42179300  | -1.15984300 |
| C  | -0.01014900 | 4.69676900  | 1.32781800  |
| C  | -0.04095500 | 4.81970400  | -1.09219000 |
| C  | -0.03083800 | 5.46139500  | 0.15197000  |
| H  | 0.01467100  | 2.69063400  | 2.16355800  |
| H  | -0.03686100 | 2.91479700  | -2.12501600 |
| H  | -0.03911300 | 6.55049000  | 0.20913200  |
| C  | -0.06347700 | 5.56261100  | -2.31027100 |
| C  | 0.00038700  | 5.37899800  | 2.58652400  |
| C  | -6.85074500 | -0.79572100 | -2.16234100 |
| C  | -6.74781100 | -1.32011200 | 2.70788200  |
| C  | 6.76997800  | -1.27624100 | 2.69597000  |
| C  | 6.85350400  | -0.78067700 | -2.17765000 |
| N  | -0.08260700 | 6.11849000  | -3.33231100 |
| N  | 0.00862500  | 5.97578600  | 3.58740900  |
| N  | -7.46563900 | -0.62933500 | -3.13693500 |
| N  | -7.27168900 | -1.35971100 | 3.74605000  |
| N  | 7.30069900  | -1.30664000 | 3.73100500  |
| N  | 7.46131600  | -0.61840200 | -3.15731400 |
| Co | 0.00790700  | -1.54735500 | 1.27481400  |
| Co | 0.00616500  | -1.30491400 | -1.08557900 |
| C  | 0.01001400  | -2.87126100 | -2.70538700 |
| C  | 0.00668200  | -1.63387900 | -3.26698800 |
| H  | 0.93419100  | -1.13669100 | -3.56161400 |
| H  | -0.92351600 | -1.14160700 | -3.56138000 |
| H  | 0.00965200  | -2.62815300 | -0.17152800 |
| H  | -0.91655600 | -3.42622800 | -2.54197700 |

H 0.93951300 -3.42138500 -2.54223500

TS2-3

0 3

O -0.00461200 0.59101400 -1.07117200  
C -0.00174000 1.18092700 0.04422800  
O 0.00729700 0.61365100 1.17109000  
O -1.89260600 -1.67055800 1.20056800  
C -2.50347100 -1.48371200 0.10688500  
O -1.93503600 -1.37827000 -1.01545500  
O 1.94615700 -1.36272800 -1.01337100  
C 2.51725500 -1.47050400 0.10752500  
O 1.90969200 -1.66500800 1.20155500  
C 4.00241900 -1.34503400 0.14681900  
C 4.72315200 -1.14813400 -1.03453100  
C 4.67153300 -1.39118200 1.37324800  
C 6.11749300 -0.99768100 -0.99264700  
C 6.06494300 -1.23465000 1.42351700  
C 6.78897000 -1.03969500 0.23825200  
H 4.19179100 -1.10597700 -1.98606100  
H 4.09947000 -1.54095400 2.28968700  
H 7.87209700 -0.91619400 0.27374100  
C -3.98897900 -1.36438700 0.14979100  
C -4.65396600 -1.41895500 1.37801400  
C -4.71422100 -1.16401300 -1.02832700  
C -6.04764500 -1.26797900 1.43365600  
C -6.10896000 -1.01786100 -0.98093400  
C -6.77624500 -1.06892300 0.25196700  
H -4.07846900 -1.57106900 2.29187600  
H -4.18614700 -1.11522100 -1.98138500  
H -7.85963900 -0.94911000 0.29164100  
C -0.01081400 2.67404300 0.03038100  
C -0.00089800 3.36763200 1.24067700  
C -0.03056500 3.37572200 -1.17643100  
C -0.01034800 4.76859800 1.25012800  
C -0.04115700 4.77852700 -1.17155900  
C -0.03078500 5.47815300 0.04289400  
H 0.01410700 2.80653000 2.17557300  
H -0.03818300 2.82289800 -2.11672400  
H -0.03880900 6.56871200 0.04678300  
C -0.06331100 5.50740100 -2.40047600  
C 0.00044900 5.46300800 2.49745300  
C -6.85502800 -0.80679700 -2.18527200  
C -6.72445500 -1.30385400 2.69541700  
C 6.74749100 -1.26061700 2.68259500  
C 6.85755500 -0.79206900 -2.20149400  
N -0.08209300 6.11352100 -3.39446300  
N 0.00954000 6.00787800 3.52591600  
N -7.46564200 -0.63258100 -3.16250800  
N -7.27133800 -1.32609300 3.72427900  
N 7.30105300 -1.27424600 3.70808700  
N 7.46131300 -0.62292900 -3.18382800  
Co 0.00778000 -1.39659100 1.39237000  
Co 0.00567700 -1.38957900 -1.06730200  
C 0.01240400 -2.86817500 -2.49440300  
C 0.00740300 -1.58836300 -3.06742600  
H 0.93403800 -1.13618500 -3.42750600  
H -0.92262000 -1.14383600 -3.42828600  
H 0.01163600 -2.83039800 -0.72327900

H -0.90600800 -3.46114300 -2.47565000  
H 0.93557500 -3.45368800 -2.47500500

INT3

0 5

O -0.03729500 0.67127500 -1.06359400  
C -0.06430500 1.27134200 0.04410400  
O -0.06748900 0.69974600 1.17124900  
O -1.91374700 -1.62676100 1.04434900  
C -2.52110700 -1.45186500 -0.05554300  
O -1.94807500 -1.34127900 -1.17470400  
O 1.94668300 -1.25938500 -1.16527000  
C 2.51716400 -1.33535900 -0.04151000  
O 1.91081600 -1.50889700 1.05858600  
C 3.99930500 -1.20287700 0.00410500  
C 4.71927200 -0.96986800 -1.17024800  
C 4.66570300 -1.27266000 1.23078700  
C 6.11073400 -0.80118000 -1.11874100  
C 6.05722000 -1.10719100 1.28811400  
C 6.78127700 -0.87083300 0.11092100  
H 4.18912400 -0.90886700 -2.12154700  
H 4.09288300 -1.44784800 2.14203000  
H 7.86273900 -0.73524500 0.15172600  
C -4.00658100 -1.35341400 -0.01120500  
C -4.67111000 -1.44736300 1.21464600  
C -4.73149100 -1.12731300 -1.18386200  
C -6.06582900 -1.31294700 1.27330700  
C -6.12661000 -0.99152300 -1.13131500  
C -6.79522200 -1.08488600 0.09792200  
H -4.09455500 -1.61731500 2.12450300  
H -4.20279500 -1.04809300 -2.13460200  
H -7.87951400 -0.97448600 0.13954800  
C -0.09213100 2.76337200 0.03902000  
C -0.09352900 3.43600100 1.26048700  
C -0.11432400 3.48588000 -1.15653400  
C -0.11521000 4.83529200 1.29589100  
C -0.13948100 4.88939400 -1.12574400  
C -0.13915600 5.56638400 0.10242200  
H -0.07621300 2.85886000 2.18528400  
H -0.11219300 2.95073500 -2.10729100  
H -0.15710800 6.65658100 0.12551500  
C -0.16546500 5.65600000 -2.33308300  
C -0.11076400 5.49095800 2.56304000  
C -6.87119800 -0.74395800 -2.32769100  
C -6.74122800 -1.39399800 2.53273100  
C 6.73606100 -1.16415100 2.54718500  
C 6.84744800 -0.54224300 -2.31742100  
N -0.18767400 6.31322800 -3.29454600  
N -0.10449000 5.98025000 3.61874100  
N -7.47918000 -0.53619000 -3.29928800  
N -7.28530300 -1.45415900 3.56123600  
N 7.28506700 -1.20454400 3.57408700  
N 7.44629100 -0.32377600 -3.29228600  
Co -0.01007000 -1.31082500 1.22909600  
Co 0.00494100 -1.33229300 -1.17581100  
C 1.19575700 -4.10129900 -0.81720900  
C -0.01717000 -3.27857700 -1.13971900  
H -0.25495100 -3.27608500 -2.22564600  
H -0.92381200 -3.61662100 -0.61614700

|   |            |             |             |
|---|------------|-------------|-------------|
| H | 1.46933000 | -4.05107200 | 0.24690000  |
| H | 1.01005000 | -5.16616200 | -1.03627900 |
| H | 2.07718100 | -3.80816500 | -1.40237100 |

INT4

0 5

|    |             |             |             |
|----|-------------|-------------|-------------|
| O  | 0.07276500  | 1.12528500  | -1.42257100 |
| C  | 0.08105000  | 1.53286600  | -0.23041100 |
| O  | 0.07147900  | 0.78960500  | 0.78961300  |
| O  | -1.92517800 | -1.17463600 | 0.82214200  |
| C  | -2.49684700 | -1.12900400 | -0.30248000 |
| O  | -1.89911500 | -1.08977900 | -1.41715500 |
| O  | 1.93908400  | -1.19286200 | -1.41689300 |
| C  | 2.52860100  | -1.26742900 | -0.29966000 |
| O  | 1.94837500  | -1.31070800 | 0.82082800  |
| C  | 4.01238300  | -1.31316100 | -0.29730600 |
| C  | 4.72422600  | -1.22364000 | -1.49389200 |
| C  | 4.69163400  | -1.44013500 | 0.91427600  |
| C  | 6.12499900  | -1.26043800 | -1.47603500 |
| C  | 6.09057700  | -1.48142700 | 0.93241100  |
| C  | 6.81291700  | -1.39062100 | -0.26298800 |
| H  | 4.18366300  | -1.12243900 | -2.43561000 |
| H  | 4.12391800  | -1.50626900 | 1.84257800  |
| H  | 7.90293900  | -1.41990600 | -0.25087200 |
| C  | -3.98031500 | -1.14688600 | -0.30857000 |
| C  | -4.66798800 | -1.26843700 | 0.89894000  |
| C  | -4.68428700 | -1.04772800 | -1.50912500 |
| C  | -6.06739500 | -1.29240500 | 0.90912900  |
| C  | -6.08544400 | -1.06785700 | -1.49916400 |
| C  | -6.78176900 | -1.19099400 | -0.29017400 |
| H  | -4.10669500 | -1.34387600 | 1.83065200  |
| H  | -4.13710900 | -0.95279200 | -2.44768800 |
| H  | -7.87211000 | -1.20745600 | -0.28428100 |
| C  | 0.09913100  | 3.01090500  | -0.00807600 |
| C  | 0.09979200  | 3.53833100  | 1.28476900  |
| C  | 0.10964800  | 3.86752600  | -1.10958500 |
| C  | 0.11055800  | 4.92828100  | 1.47793700  |
| C  | 0.12054200  | 5.25649900  | -0.92301800 |
| C  | 0.12108300  | 5.79009500  | 0.37239300  |
| H  | 0.09052300  | 2.85964500  | 2.13914600  |
| H  | 0.10794900  | 3.44131700  | -2.11348600 |
| H  | 0.12881900  | 6.87053900  | 0.52076200  |
| C  | 0.12876900  | 6.12177400  | -2.05971400 |
| C  | -6.81323400 | -0.96175300 | -2.72095900 |
| C  | 0.10874500  | 5.47769100  | 2.79815800  |
| C  | -6.75373300 | -1.42162100 | 2.15147000  |
| C  | 6.76838100  | -1.61677700 | 2.17890000  |
| C  | 6.86096200  | -1.16279300 | -2.69369500 |
| N  | 0.13411500  | 6.81142900  | -2.99770500 |
| N  | 0.10618200  | 5.93654600  | 3.86881600  |
| N  | -7.41414100 | -0.87458200 | -3.71318600 |
| N  | -7.28828400 | -1.52968100 | 3.17865800  |
| N  | 7.29611000  | -1.72977700 | 3.20911600  |
| N  | 7.46856200  | -1.08171700 | -3.68238300 |
| Co | 0.00841700  | -1.23950100 | 0.82107300  |
| Co | 0.02559200  | -0.88774800 | -1.59273000 |
| C  | 0.01819500  | -3.15653300 | 0.32935100  |
| C  | -0.08429500 | -1.76417300 | 3.46002100  |
| H  | 0.75400000  | -3.32350900 | -0.47367300 |

|   |             |             |             |
|---|-------------|-------------|-------------|
| H | 0.51877700  | -3.44405200 | 1.27284600  |
| C | -1.26193800 | -3.91162300 | 0.11359100  |
| C | -0.12733200 | -0.42977600 | 3.45961600  |
| H | -0.99197200 | -2.36845300 | 3.36388800  |
| H | 0.85681900  | -2.30838900 | 3.58201900  |
| H | -1.98074200 | -3.77020400 | 0.93270000  |
| H | -1.76712700 | -3.63921700 | -0.82412300 |
| H | -1.06288900 | -4.99474600 | 0.05071300  |
| H | -1.06693200 | 0.11628400  | 3.34170400  |
| H | 0.77713400  | 0.17593300  | 3.55988600  |

TS4-5

O 3

|   |             |             |             |
|---|-------------|-------------|-------------|
| O | 0.01791500  | 1.19655200  | -1.34448000 |
| C | 0.06212600  | 1.57510100  | -0.14791800 |
| O | 0.08988100  | 0.82058400  | 0.86818700  |
| O | -1.91208700 | -1.08678400 | 0.79607100  |
| C | -2.48019000 | -1.11744800 | -0.33627700 |
| O | -1.87645800 | -1.15120300 | -1.44368400 |
| O | 1.90038800  | -1.18323000 | -1.43071100 |
| C | 2.50137800  | -1.22408100 | -0.32143800 |
| O | 1.93055700  | -1.23103500 | 0.80952000  |
| C | 3.98862900  | -1.27577400 | -0.31889400 |
| C | 4.70292800  | -1.16366200 | -1.51400000 |
| C | 4.67138200  | -1.42747300 | 0.89012100  |
| C | 6.10517800  | -1.19588300 | -1.49829700 |
| C | 6.07138800  | -1.47581900 | 0.90852900  |
| C | 6.79232200  | -1.35610300 | -0.28664900 |
| H | 4.16172500  | -1.04420600 | -2.45348500 |
| H | 4.10507500  | -1.50827400 | 1.81823300  |
| H | 7.88244100  | -1.38550800 | -0.27567200 |
| C | -3.96803100 | -1.13249000 | -0.33432400 |
| C | -4.65644300 | -1.26563300 | 0.87394000  |
| C | -4.67682300 | -1.00756300 | -1.53124300 |
| C | -6.05743800 | -1.28284200 | 0.88916000  |
| C | -6.07924600 | -1.00466900 | -1.51819500 |
| C | -6.77256200 | -1.14720500 | -0.30793300 |
| H | -4.09425600 | -1.35620500 | 1.80401200  |
| H | -4.13092400 | -0.90390200 | -2.46987200 |
| H | -7.86309700 | -1.15048200 | -0.29921100 |
| C | 0.08490000  | 3.04697200  | 0.11032600  |
| C | 0.09364300  | 3.54367200  | 1.41503700  |
| C | 0.09428700  | 3.92997200  | -0.97105000 |
| C | 0.10925400  | 4.92827600  | 1.64020300  |
| C | 0.11441700  | 5.31426400  | -0.75161300 |
| C | 0.12086500  | 5.81687700  | 0.55650300  |
| H | 0.08642300  | 2.84566900  | 2.25303800  |
| H | 0.08609800  | 3.52811000  | -1.98490500 |
| H | 0.13437400  | 6.89341000  | 0.73066200  |
| C | 0.12819900  | 6.21175700  | -1.86371100 |
| C | -6.81249000 | -0.84868200 | -2.73514200 |
| C | 0.11100900  | 5.43898000  | 2.97520800  |
| C | -6.74867500 | -1.43942900 | 2.12998900  |
| C | 6.75359600  | -1.64872500 | 2.15203700  |
| C | 6.84678000  | -1.05973900 | -2.71283400 |
| N | 0.14029100  | 6.93611300  | -2.77541300 |
| N | 0.11008000  | 5.85737800  | 4.06203600  |
| N | -7.41894300 | -0.71428000 | -3.72003300 |
| N | -7.29505300 | -1.57430300 | 3.14928300  |
| N | 7.28903200  | -1.79632100 | 3.17530800  |

|    |             |             |             |
|----|-------------|-------------|-------------|
| N  | 7.46344100  | -0.94377400 | -3.69384200 |
| Co | 0.00913400  | -1.13301300 | 0.85172100  |
| Co | 0.01832400  | -0.76990400 | -1.72941500 |
| C  | -0.00190800 | -3.22532600 | 0.59575600  |
| C  | -0.14809300 | -2.51875900 | 2.46548800  |
| H  | -0.01910900 | -2.71707600 | -0.39735300 |
| H  | 1.00082100  | -3.65784300 | 0.69124400  |
| C  | -1.10304300 | -4.24580900 | 0.63401800  |
| C  | 0.02409700  | -1.14154700 | 2.79968400  |
| H  | -1.15278900 | -2.92127600 | 2.61923400  |
| H  | 0.64141200  | -3.21390800 | 2.76691500  |
| H  | -1.05299100 | -4.88482400 | 1.52688500  |
| H  | -2.09988800 | -3.78261500 | 0.61383000  |
| H  | -1.03753300 | -4.91137300 | -0.23981000 |
| H  | -0.83974000 | -0.55512700 | 3.12227200  |
| H  | 0.99844500  | -0.77584200 | 3.13227100  |

INT5

0 7

|   |             |             |             |
|---|-------------|-------------|-------------|
| O | 0.00373600  | 1.32850800  | -1.12321600 |
| C | -0.01326200 | 1.72907900  | 0.08715000  |
| O | -0.03225300 | 0.97739900  | 1.09025400  |
| O | -1.88191100 | -1.24360600 | 0.47653900  |
| C | -2.47192200 | -1.16469200 | -0.62635600 |
| O | -1.87133100 | -1.01377700 | -1.74297300 |
| O | 1.87641300  | -1.02298600 | -1.73945900 |
| C | 2.47615200  | -1.13380400 | -0.61743500 |
| O | 1.88610600  | -1.16464000 | 0.48747200  |
| C | 3.96681800  | -1.17902900 | -0.61109800 |
| C | 4.69078200  | -0.92950900 | -1.77976900 |
| C | 4.64070000  | -1.40662700 | 0.59391500  |
| C | 6.09370400  | -0.88977200 | -1.74196100 |
| C | 6.04259900  | -1.38746200 | 0.63607700  |
| C | 6.76934300  | -1.12377600 | -0.53501000 |
| H | 4.15706900  | -0.74612100 | -2.71338400 |
| H | 4.06312200  | -1.58906000 | 1.50127700  |
| H | 7.85923800  | -1.09170700 | -0.50580400 |
| C | -3.96294600 | -1.19885200 | -0.62268300 |
| C | -4.64012000 | -1.42593000 | 0.58057700  |
| C | -4.68361800 | -0.93909600 | -1.79133100 |
| C | -6.04179200 | -1.39454300 | 0.62141300  |
| C | -6.08635800 | -0.89133900 | -1.75563200 |
| C | -6.76515000 | -1.12312000 | -0.54995200 |
| H | -4.06511900 | -1.61633800 | 1.48790000  |
| H | -4.14734700 | -0.75538300 | -2.72340700 |
| H | -7.85482500 | -1.08324500 | -0.52202600 |
| C | -0.00985200 | 3.19769500  | 0.33232500  |
| C | -0.01115800 | 3.63479900  | 1.65603300  |
| C | -0.00387300 | 4.12785800  | -0.71151500 |
| C | -0.00541900 | 5.00176900  | 1.94849200  |
| C | -0.00011500 | 5.50219800  | -0.42048800 |
| C | -0.00039600 | 5.94099600  | 0.91168300  |
| H | -0.01574800 | 2.89917500  | 2.46035400  |
| H | -0.00245800 | 3.77907400  | -1.74523800 |
| H | 0.00350500  | 7.00844600  | 1.13487800  |
| C | 0.00414600  | 6.48947400  | -1.45581200 |
| C | -6.82903000 | -0.57983000 | -2.94009600 |
| C | -0.00372100 | 5.39453600  | 3.31823800  |
| C | -6.73347400 | -1.61640600 | 1.85759100  |
| C | 6.73186300  | -1.61423800 | 1.87277500  |



|    |             |             |             |
|----|-------------|-------------|-------------|
| C  | 6.83925400  | -0.58317600 | -2.92579200 |
| N  | 0.00722500  | 7.33619200  | -2.25578000 |
| N  | -0.00158900 | 5.63930000  | 4.45504200  |
| N  | -7.43619400 | -0.30992700 | -3.89753500 |
| N  | -7.29417700 | -1.78957200 | 2.86503200  |
| N  | 7.29154800  | -1.79245000 | 2.87993000  |
| N  | 7.44792000  | -0.31572600 | -3.88293300 |
| Co | -0.00446100 | -1.01945600 | 1.19064600  |
| Co | 0.00333600  | -0.56413500 | -1.57065500 |
| C  | 0.36388300  | -4.15333100 | 1.17381600  |
| C  | -0.39312900 | -3.61886800 | 2.38546500  |
| H  | 0.15474400  | -3.50547600 | 0.29645200  |
| H  | 1.44968400  | -4.04766500 | 1.34772600  |
| C  | 0.02527000  | -5.58779700 | 0.82874400  |
| C  | 0.01330800  | -2.22762400 | 2.80609300  |
| H  | -1.47694200 | -3.64893200 | 2.17299000  |
| H  | -0.25371200 | -4.33018000 | 3.22473500  |
| H  | 0.27102400  | -6.26543600 | 1.65943000  |
| H  | -1.04835600 | -5.71044500 | 0.62247000  |
| H  | 0.57178200  | -5.94387000 | -0.05485400 |
| H  | -0.65424700 | -1.78363800 | 3.56130100  |
| H  | 1.05483600  | -2.17164800 | 3.16745700  |

#### INT6

0 7

|   |             |             |             |
|---|-------------|-------------|-------------|
| O | 0.23694900  | 0.81924100  | -1.21720600 |
| C | 0.23120500  | 1.47958500  | -0.15274200 |
| O | 0.16938900  | 0.98242300  | 1.02035600  |
| O | -1.84475400 | -1.22695700 | 1.54629300  |
| C | -2.47097000 | -1.06794200 | 0.44454500  |
| O | -1.90530100 | -1.01637200 | -0.67274200 |
| O | 1.96000900  | -1.45231200 | -0.70763100 |
| C | 2.54081900  | -1.44591700 | 0.40226300  |
| O | 1.92556900  | -1.42887500 | 1.52199800  |
| C | 4.03383600  | -1.39527400 | 0.42407700  |
| C | 4.74386400  | -1.37606800 | -0.78202700 |
| C | 4.71934000  | -1.29275500 | 1.63830300  |
| C | 6.14204200  | -1.25012400 | -0.77996200 |
| C | 6.11743300  | -1.16158500 | 1.65064000  |
| C | 6.82762600  | -1.14193400 | 0.44044300  |
| H | 4.19635100  | -1.44530500 | -1.72304900 |
| H | 4.15671000  | -1.29890100 | 2.57291200  |
| H | 7.91302300  | -1.03335100 | 0.44792900  |
| C | -3.95170200 | -0.87965500 | 0.49570200  |
| C | -4.60145200 | -0.73623000 | 1.72515500  |
| C | -4.67940500 | -0.77144500 | -0.69541300 |
| C | -5.97920800 | -0.46826200 | 1.76807800  |
| C | -6.06055700 | -0.52144800 | -0.66242400 |
| C | -6.70835200 | -0.36601300 | 0.57354200  |
| H | -4.02426800 | -0.81298000 | 2.64769200  |
| H | -4.15894800 | -0.86992300 | -1.64934800 |
| H | -7.77823000 | -0.15561200 | 0.60513000  |
| C | 0.29851100  | 2.96198700  | -0.25460400 |
| C | 0.35067600  | 3.76513000  | 0.88677700  |
| C | 0.30178400  | 3.54402900  | -1.52113700 |
| C | 0.40964000  | 5.16055400  | 0.75555700  |
| C | 0.35264400  | 4.93562400  | -1.65322800 |
| C | 0.40882700  | 5.74926500  | -0.51603900 |
| H | 0.34584400  | 3.29997900  | 1.87325000  |
| H | 0.26034400  | 2.90468000  | -2.40333500 |

|    |             |             |             |
|----|-------------|-------------|-------------|
| H  | 0.45061400  | 6.83426800  | -0.61721000 |
| C  | 0.34050500  | 5.50142100  | -2.96041200 |
| C  | 0.46997800  | 6.00293000  | 1.90720300  |
| C  | -6.81122900 | -0.40050500 | -1.88033200 |
| C  | -6.63533700 | -0.26970700 | 3.02738900  |
| C  | 6.81844800  | -1.02275900 | 2.89384900  |
| C  | 6.87269800  | -1.20839000 | -2.01502100 |
| N  | 0.32342600  | 5.91798500  | -4.04576600 |
| N  | 0.52097000  | 6.71414700  | 2.82724700  |
| N  | -7.42850700 | -0.29431500 | -2.86452900 |
| N  | -7.16258200 | -0.09036700 | 4.05170100  |
| N  | 7.38682000  | -0.89696700 | 3.90414300  |
| N  | 7.47234300  | -1.16416900 | -3.01465000 |
| Co | 0.06353900  | -0.92766300 | 1.36975700  |
| Co | 0.02829900  | -1.17552100 | -1.32065400 |
| C  | -0.45392900 | -3.67699300 | -1.63645800 |
| C  | -0.13011400 | -2.63701300 | -2.68684300 |
| H  | 0.84005000  | -2.75429200 | -3.18840700 |
| H  | -0.93161700 | -2.46553700 | -3.41926200 |
| H  | -0.24019800 | -3.29496300 | -0.59862400 |
| H  | 0.23977300  | -4.53596500 | -1.69613400 |
| C  | -1.89844100 | -4.15545900 | -1.64932400 |
| H  | -2.06460900 | -4.73524800 | -2.57253300 |
| C  | -2.28214400 | -4.97399200 | -0.43507000 |
| H  | -2.18577900 | -4.38884300 | 0.49368100  |
| H  | -3.31983100 | -5.32989200 | -0.48822000 |
| H  | -1.64059000 | -5.86060200 | -0.32160800 |
| H  | -2.56266200 | -3.27925800 | -1.73913400 |

TS6-7

0 3

|   |             |             |             |
|---|-------------|-------------|-------------|
| O | -0.16228100 | 0.77198200  | 1.03193900  |
| C | -0.13554100 | 1.54030000  | 0.03068400  |
| O | -0.06088000 | 1.17275800  | -1.17316800 |
| O | 1.86579100  | -1.06674500 | -1.54991700 |
| C | 2.47513400  | -1.02254900 | -0.44228900 |
| O | 1.91052500  | -1.03555100 | 0.68701300  |
| O | -1.93817600 | -1.33852300 | 0.73844600  |
| C | -2.51813200 | -1.27037800 | -0.38017000 |
| O | -1.92084800 | -1.16213700 | -1.49096000 |
| C | -4.00477600 | -1.31565400 | -0.38912600 |
| C | -4.70570900 | -1.54120100 | 0.79787300  |
| C | -4.69889500 | -1.11246600 | -1.58350900 |
| C | -6.10721200 | -1.57155600 | 0.79091700  |
| C | -6.10070400 | -1.12503400 | -1.59169500 |
| C | -6.80757200 | -1.35915700 | -0.40446500 |
| H | -4.15425000 | -1.69207200 | 1.72651400  |
| H | -4.14185800 | -0.93520400 | -2.50420700 |
| H | -7.89806600 | -1.37315300 | -0.41013000 |
| C | 3.96131600  | -0.96193100 | -0.45902600 |
| C | 4.63912300  | -0.74126500 | -1.65990600 |
| C | 4.67727400  | -1.11596900 | 0.73018200  |
| C | 6.03905500  | -0.66125100 | -1.67052700 |
| C | 6.07793700  | -1.06442000 | 0.71949600  |
| C | 6.76137700  | -0.83030500 | -0.48121900 |
| H | 4.07060800  | -0.62107900 | -2.58290100 |
| H | 4.13905000  | -1.27531800 | 1.66525400  |
| H | 7.85063100  | -0.77684600 | -0.49023400 |
| C | -0.19921200 | 3.01028500  | 0.29390900  |
| C | -0.23860600 | 3.90082700  | -0.78034300 |

|    |             |             |             |
|----|-------------|-------------|-------------|
| C  | -0.21772500 | 3.49548700  | 1.60253600  |
| C  | -0.30070300 | 5.28228200  | -0.54983000 |
| C  | -0.27218500 | 4.87712200  | 1.83888500  |
| C  | -0.31580500 | 5.77353800  | 0.76241700  |
| H  | -0.22192200 | 3.50775500  | -1.79750400 |
| H  | -0.18698700 | 2.79023100  | 2.43407000  |
| H  | -0.36089600 | 6.84774700  | 0.94554900  |
| C  | -0.28088000 | 5.37655400  | 3.17789800  |
| C  | -0.34965100 | 6.18861300  | -1.65389500 |
| C  | 6.80591300  | -1.25280300 | 1.93481800  |
| C  | 6.73447400  | -0.39514400 | -2.89068000 |
| C  | -6.80984900 | -0.88838100 | -2.80969100 |
| C  | -6.82450000 | -1.81738400 | 2.00275000  |
| N  | -0.28482800 | 5.78508100  | 4.26835100  |
| N  | -0.39152900 | 6.92103500  | -2.55829000 |
| N  | 7.38985800  | -1.41722800 | 2.92866000  |
| N  | 7.30287600  | -0.16584300 | -3.88070200 |
| N  | -7.38354400 | -0.68607500 | -3.80244700 |
| N  | -7.40713400 | -2.02240300 | 2.98988400  |
| Co | -0.04285900 | -0.78241800 | -1.68103400 |
| Co | -0.01116700 | -1.18709400 | 0.75850100  |
| C  | 1.37835000  | -3.71069100 | 1.96736900  |
| C  | 0.12042700  | -2.88752400 | 1.97637000  |
| H  | 1.30987500  | -4.36875600 | 2.85193900  |
| H  | 2.24231200  | -3.05755600 | 2.16061100  |
| C  | 1.60345300  | -4.54816400 | 0.72702800  |
| C  | 0.02046200  | -1.67879000 | 2.69546100  |
| H  | -0.80632100 | -3.46223400 | 1.84462200  |
| H  | 0.73692900  | -5.18831300 | 0.50496900  |
| H  | 1.77574000  | -3.91858100 | -0.16007600 |
| H  | 2.47546700  | -5.20611000 | 0.83480400  |
| H  | -0.93772300 | -1.34415100 | 3.09720400  |
| H  | 0.91673400  | -1.24237400 | 3.14599200  |
| H  | 0.07661800  | -2.58138100 | 0.26356100  |

#### INT7

0 5

|   |             |             |             |
|---|-------------|-------------|-------------|
| O | -0.18482800 | 0.80424300  | 1.05818500  |
| C | -0.17658400 | 1.56907400  | 0.05799700  |
| O | -0.11158000 | 1.19167100  | -1.14669600 |
| O | 1.90427600  | -0.87817400 | -1.54818200 |
| C | 2.48990000  | -0.93133300 | -0.42706200 |
| O | 1.92067100  | -1.04878100 | 0.69368700  |
| O | -1.95137600 | -1.37991200 | 0.73085300  |
| C | -2.54108500 | -1.24299100 | -0.37608500 |
| O | -1.97468000 | -1.05079900 | -1.49260100 |
| C | -4.02518800 | -1.30625400 | -0.37472800 |
| C | -4.71769700 | -1.54653800 | 0.81225600  |
| C | -4.72361700 | -1.10318200 | -1.56482000 |
| C | -6.11786700 | -1.58699700 | 0.80699200  |
| C | -6.12335500 | -1.13608400 | -1.56903800 |
| C | -6.82589900 | -1.38032600 | -0.38342000 |
| H | -4.16194400 | -1.69783100 | 1.73809600  |
| H | -4.17169000 | -0.91240800 | -2.48544200 |
| H | -7.91606700 | -1.40624600 | -0.38538700 |
| C | 3.97355700  | -0.86838100 | -0.43055700 |
| C | 4.65464900  | -0.63740800 | -1.62575900 |
| C | 4.68201500  | -1.03514400 | 0.75948400  |
| C | 6.05328300  | -0.56616100 | -1.63027900 |
| C | 6.08139000  | -0.97878300 | 0.75270400  |

|    |             |             |             |
|----|-------------|-------------|-------------|
| C  | 6.77206400  | -0.74072700 | -0.44173300 |
| H  | 4.08976700  | -0.50707900 | -2.54919000 |
| H  | 4.13876600  | -1.20570300 | 1.68964300  |
| H  | 7.86133200  | -0.68946500 | -0.44556200 |
| C  | -0.24799800 | 3.04066700  | 0.30874900  |
| C  | -0.29144100 | 3.92699100  | -0.76876500 |
| C  | -0.26805500 | 3.53048200  | 1.61573800  |
| C  | -0.35825600 | 5.30912300  | -0.54224900 |
| C  | -0.32840400 | 4.91237400  | 1.84828200  |
| C  | -0.37533900 | 5.80460500  | 0.76844800  |
| H  | -0.27359300 | 3.53129700  | -1.78489600 |
| H  | -0.23395300 | 2.82789100  | 2.44941200  |
| H  | -0.42434700 | 6.87932300  | 0.94760200  |
| C  | -0.33934700 | 5.41515800  | 3.18626700  |
| C  | -0.40880400 | 6.21306200  | -1.64825200 |
| C  | 6.80312000  | -1.16492200 | 1.96773500  |
| C  | 6.74382100  | -0.30712000 | -2.85022400 |
| C  | -6.82743600 | -0.90949900 | -2.78746800 |
| C  | -6.82837500 | -1.83477500 | 2.01801800  |
| N  | -0.34512200 | 5.82499300  | 4.27629100  |
| N  | -0.45107900 | 6.94501800  | -2.55299300 |
| N  | 7.38412400  | -1.32358200 | 2.96271900  |
| N  | 7.29701300  | -0.08794500 | -3.84951600 |
| N  | -7.38527400 | -0.71608200 | -3.78943900 |
| N  | -7.40808300 | -2.03751100 | 3.00580900  |
| Co | -0.04835800 | -0.77303700 | -1.59237900 |
| Co | -0.01387600 | -1.19506400 | 0.81186000  |
| C  | 1.61347200  | -4.02231000 | 1.62786200  |
| C  | 0.28014900  | -3.42051600 | 1.92691800  |
| H  | 1.70261600  | -4.91792600 | 2.27038300  |
| H  | 2.40887600  | -3.34206300 | 1.97116000  |
| C  | 1.83383500  | -4.43585500 | 0.18538700  |
| C  | 0.06387700  | -2.39721700 | 2.78562100  |
| H  | -0.59203600 | -3.92788000 | 1.49252500  |
| H  | 1.04332300  | -5.11536100 | -0.16542300 |
| H  | 1.84075500  | -3.57328900 | -0.49624300 |
| H  | 2.79081100  | -4.96017800 | 0.06338200  |
| H  | -0.94590500 | -2.11426300 | 3.09198400  |
| H  | 0.89873200  | -1.91234100 | 3.30305300  |
| H  | 0.04166000  | -2.17205300 | -0.41128000 |

## H-Ni-DHKUST-1

### INT1

0 3

|    |             |             |             |
|----|-------------|-------------|-------------|
| O  | -0.00006800 | 0.73332400  | -1.19783100 |
| C  | -0.00016700 | 1.28964000  | -0.06822700 |
| O  | -0.00025100 | 0.68218800  | 1.04502100  |
| O  | -1.91067000 | -1.56141400 | 1.09664000  |
| C  | -2.48603800 | -1.45634500 | -0.02478800 |
| O  | -1.89722900 | -1.30365100 | -1.13684400 |
| O  | 1.89742000  | -1.30379000 | -1.13682800 |
| C  | 2.48616600  | -1.45615800 | -0.02471700 |
| O  | 1.91074600  | -1.56091800 | 1.09671500  |
| C  | 3.97467500  | -1.49692900 | -0.03450100 |
| C  | 4.68409800  | -1.47203800 | -1.23786500 |
| C  | 4.65899800  | -1.54447100 | 1.18233900  |
| C  | 6.08688200  | -1.49948300 | -1.22283600 |
| C  | 6.06012100  | -1.56262700 | 1.20253700  |
| C  | 6.77592800  | -1.54258100 | -0.00201600 |
| H  | 4.14152500  | -1.43106900 | -2.18320500 |
| H  | 4.09305500  | -1.56078000 | 2.11410500  |
| H  | 7.86644500  | -1.55814500 | 0.00865100  |
| C  | -3.97455000 | -1.49712500 | -0.03463800 |
| C  | -4.65890600 | -1.54514300 | 1.18216800  |
| C  | -4.68394600 | -1.47173400 | -1.23800700 |
| C  | -6.06003000 | -1.56328700 | 1.20233000  |
| C  | -6.08673300 | -1.49914000 | -1.22301900 |
| C  | -6.77580800 | -1.54272600 | -0.00223200 |
| H  | -4.09298300 | -1.56183000 | 2.11394000  |
| H  | -4.14135200 | -1.43039100 | -2.18331900 |
| H  | -7.86632500 | -1.55826400 | 0.00840200  |
| C  | -0.00019200 | 2.78122900  | -0.01816500 |
| C  | -0.00044500 | 3.42715800  | 1.21902000  |
| C  | 0.00007800  | 3.52806500  | -1.19809000 |
| C  | -0.00043600 | 4.82708100  | 1.28270300  |
| C  | 0.00011300  | 4.92989900  | -1.13948400 |
| C  | -0.00015000 | 5.58125400  | 0.10212000  |
| H  | -0.00064700 | 2.83171200  | 2.13249100  |
| H  | 0.00027900  | 3.01187400  | -2.15912600 |
| H  | -0.00012600 | 6.67094100  | 0.14764500  |
| C  | 0.00043900  | 5.70714300  | -2.33973600 |
| C  | -6.82663900 | -1.48042500 | -2.44736100 |
| C  | -0.00070400 | 5.47520300  | 2.55613200  |
| C  | -6.74915300 | -1.59428600 | 2.45515200  |
| C  | 6.74921600  | -1.59312600 | 2.45538300  |
| C  | 6.82680800  | -1.48132000 | -2.44717400 |
| N  | 0.00073200  | 6.35321400  | -3.30869500 |
| N  | -0.00093000 | 5.98351600  | 3.60358600  |
| N  | -7.44209000 | -1.46683600 | -3.43616400 |
| N  | -7.29292400 | -1.61337400 | 3.48487500  |
| N  | 7.29296500  | -1.61180000 | 3.48511700  |
| N  | 7.44226200  | -1.46818700 | -3.43598100 |
| Ni | -0.00000900 | -1.28271300 | 1.15016200  |
| Ni | 0.00011000  | -1.25028500 | -1.17525700 |
| H  | -0.00013800 | -2.69811600 | -1.00326100 |

### INT2

0 1

|   |             |            |             |
|---|-------------|------------|-------------|
| O | -0.00924700 | 0.60538800 | -1.16502400 |
| C | -0.00340800 | 1.20227500 | -0.05909200 |

|    |             |             |             |
|----|-------------|-------------|-------------|
| O  | 0.00832900  | 0.62971000  | 1.06695700  |
| O  | -1.92232800 | -1.47984300 | 1.29722800  |
| C  | -2.53832700 | -1.40719900 | 0.18677700  |
| O  | -2.02979500 | -1.38904700 | -0.96086700 |
| O  | 2.03918600  | -1.36604600 | -0.95792000 |
| C  | 2.55140900  | -1.39067300 | 0.18809100  |
| O  | 1.93904200  | -1.47439600 | 1.29963300  |
| C  | 4.03790300  | -1.28671000 | 0.26188300  |
| C  | 4.76851500  | -1.16036900 | -0.91858400 |
| C  | 4.69132200  | -1.27410500 | 1.49338000  |
| C  | 6.16011100  | -1.01843600 | -0.87134300 |
| C  | 6.08456900  | -1.13193500 | 1.54148000  |
| C  | 6.82456500  | -1.00428700 | 0.36003100  |
| H  | 4.24306800  | -1.16181500 | -1.87370300 |
| H  | 4.11051000  | -1.36486700 | 2.41175900  |
| H  | 7.90804900  | -0.88771600 | 0.40031500  |
| C  | -4.02489100 | -1.30813400 | 0.26519900  |
| C  | -4.67382400 | -1.30266100 | 1.49904400  |
| C  | -4.76008000 | -1.17818200 | -0.91210200 |
| C  | -6.06719500 | -1.16480500 | 1.55299800  |
| C  | -6.15180600 | -1.03878700 | -0.85890900 |
| C  | -6.81178700 | -1.03265400 | 0.37500100  |
| H  | -4.08940900 | -1.39578300 | 2.41486800  |
| H  | -4.23811200 | -1.17417800 | -1.86914200 |
| H  | -7.89536100 | -0.91859300 | 0.41978800  |
| C  | -0.01182700 | 2.69598100  | -0.07374500 |
| C  | -0.00111200 | 3.41965200  | 1.12070100  |
| C  | -0.03172600 | 3.36695700  | -1.29706700 |
| C  | -0.01003300 | 4.82266200  | 1.09175500  |
| C  | -0.04148800 | 4.76802500  | -1.33201800 |
| C  | -0.03043200 | 5.49852900  | -0.13652000 |
| H  | 0.01411700  | 2.88484600  | 2.07127300  |
| H  | -0.03998600 | 2.78910900  | -2.22194800 |
| H  | -0.03780800 | 6.58889200  | -0.16047600 |
| C  | -0.06321400 | 5.44247000  | -2.59156300 |
| C  | 0.00112300  | 5.57587700  | 2.30790500  |
| C  | -6.88684000 | -0.88551300 | -2.06972400 |
| C  | -6.73112600 | -1.14067900 | 2.81337700  |
| C  | 6.75417500  | -1.09883700 | 2.79874000  |
| C  | 6.88930600  | -0.87172300 | -2.08640900 |
| N  | -0.08139500 | 5.97322600  | -3.62769600 |
| N  | 0.01003600  | 6.20272400  | 3.28968600  |
| N  | -7.46554400 | -0.75309600 | -3.06966200 |
| N  | -7.27149400 | -1.11241500 | 3.84263100  |
| N  | 7.30090200  | -1.06267500 | 3.82441400  |
| N  | 7.46141200  | -0.74578200 | -3.09094600 |
| Ni | 0.00803900  | -1.33632900 | 1.29715500  |
| Ni | 0.00479200  | -1.39116400 | -1.28586800 |
| C  | 0.01691100  | -3.39928600 | -2.16683200 |
| C  | 0.01210300  | -2.44220800 | -3.13570100 |
| H  | 0.94315300  | -2.09375500 | -3.59251000 |
| H  | -0.92231000 | -2.10411500 | -3.59342900 |
| H  | 0.01005500  | -2.33593000 | 0.01375900  |
| H  | -0.91076600 | -3.85896600 | -1.81849900 |
| H  | 0.94924300  | -3.84876100 | -1.81760400 |

TS2-3

03

|   |             |            |             |
|---|-------------|------------|-------------|
| O | -0.00362100 | 0.61530900 | -1.13315400 |
| C | -0.00243100 | 1.17449400 | -0.00085200 |

|    |             |             |             |
|----|-------------|-------------|-------------|
| O  | 0.00471900  | 0.58280900  | 1.11263700  |
| O  | -1.90064900 | -1.63384900 | 1.27117200  |
| C  | -2.52309500 | -1.48827700 | 0.17834300  |
| O  | -1.98780500 | -1.39861000 | -0.95785000 |
| O  | 1.99912800  | -1.38387800 | -0.95611700 |
| C  | 2.53700300  | -1.47430200 | 0.17890900  |
| O  | 1.91730900  | -1.62543300 | 1.27240900  |
| C  | 4.02319300  | -1.36376400 | 0.23871200  |
| C  | 4.74980300  | -1.19393600 | -0.94100400 |
| C  | 4.68220800  | -1.38215600 | 1.46900700  |
| C  | 6.14187900  | -1.04009200 | -0.89507900 |
| C  | 6.07488800  | -1.22531400 | 1.51975500  |
| C  | 6.80773400  | -1.05535800 | 0.33749100  |
| H  | 4.22204100  | -1.17137400 | -1.89483200 |
| H  | 4.10390500  | -1.50699600 | 2.38527300  |
| H  | 7.89018300  | -0.92836900 | 0.37784100  |
| C  | -4.00953200 | -1.38329700 | 0.24171300  |
| C  | -4.66455500 | -1.41002100 | 1.47389000  |
| C  | -4.74043800 | -1.20960400 | -0.93489000 |
| C  | -6.05746200 | -1.25819400 | 1.53002100  |
| C  | -6.13286900 | -1.05965900 | -0.88349900 |
| C  | -6.79466300 | -1.08383900 | 0.35119100  |
| H  | -4.08294600 | -1.53750400 | 2.38766200  |
| H  | -4.21584900 | -1.18054800 | -1.89031100 |
| H  | -7.87733600 | -0.96020800 | 0.39570000  |
| C  | -0.01116800 | 2.66813900  | 0.01500900  |
| C  | -0.00122400 | 3.35908000  | 1.22830600  |
| C  | -0.03064400 | 3.37161400  | -1.18940200 |
| C  | -0.01023000 | 4.76181200  | 1.23721200  |
| C  | -0.04100100 | 4.77292900  | -1.18535700 |
| C  | -0.03047200 | 5.47146400  | 0.02865500  |
| H  | 0.01355800  | 2.79703000  | 2.16302600  |
| H  | -0.03825800 | 2.82011500  | -2.13001800 |
| H  | -0.03814400 | 6.56204200  | 0.03418000  |
| C  | -0.06296300 | 5.48097500  | -2.42517500 |
| C  | 0.00077100  | 5.47868400  | 2.47393700  |
| C  | -6.87257500 | -0.86511700 | -2.09034100 |
| C  | -6.72722900 | -1.26166500 | 2.79167600  |
| C  | 6.75020700  | -1.21913300 | 2.77856900  |
| C  | 6.87566900  | -0.85121100 | -2.10628700 |
| N  | -0.08158600 | 6.03983100  | -3.44606400 |
| N  | 0.00977900  | 6.07348200  | 3.47504300  |
| N  | -7.46542400 | -0.69993500 | -3.07867300 |
| N  | -7.27141200 | -1.25471400 | 3.82068400  |
| N  | 7.30098200  | -1.20379900 | 3.80401800  |
| N  | 7.46153200  | -0.69132400 | -3.09960300 |
| Ni | 0.00767700  | -1.39593600 | 1.23693400  |
| Ni | 0.00568100  | -1.35457100 | -1.17071700 |
| C  | 0.01138300  | -2.68189500 | -2.91806800 |
| C  | 0.00636800  | -1.35803900 | -3.30140600 |
| H  | 0.93523700  | -0.83248300 | -3.53271800 |
| H  | -0.92640700 | -0.83970300 | -3.53327200 |
| H  | 0.01168100  | -2.82799500 | -1.15672000 |
| H  | -0.91369200 | -3.26420100 | -2.93358900 |
| H  | 0.94091700  | -3.25707200 | -2.93312800 |

### INT3

0 3

|   |            |            |             |
|---|------------|------------|-------------|
| O | 0.06688500 | 0.82410200 | -1.15485900 |
| C | 0.06550500 | 1.46007200 | -0.07117000 |

|    |             |             |             |
|----|-------------|-------------|-------------|
| O  | 0.04728600  | 0.93432100  | 1.08285200  |
| O  | -1.89383000 | -1.27195600 | 1.23665900  |
| C  | -2.47894300 | -1.19763500 | 0.11662000  |
| O  | -1.90197900 | -1.11127200 | -1.00640500 |
| O  | 1.92272400  | -1.23746000 | -1.02187900 |
| C  | 2.50306000  | -1.31080600 | 0.09988900  |
| O  | 1.92200800  | -1.34024400 | 1.22436500  |
| C  | 3.99123800  | -1.36275300 | 0.10359400  |
| C  | 4.70213900  | -1.42230600 | -1.09672900 |
| C  | 4.67314500  | -1.34346500 | 1.32219200  |
| C  | 6.10367400  | -1.46874600 | -1.07766500 |
| C  | 6.07391100  | -1.38064800 | 1.34519600  |
| C  | 6.79162800  | -1.44583200 | 0.14362600  |
| H  | 4.16032400  | -1.43267800 | -2.04326000 |
| H  | 4.10579400  | -1.29472800 | 2.25202100  |
| H  | 7.88172900  | -1.47745200 | 0.15745400  |
| C  | -3.96682400 | -1.21938000 | 0.12416000  |
| C  | -4.64373900 | -1.19017200 | 1.34528100  |
| C  | -4.68307700 | -1.26512800 | -1.07383500 |
| C  | -6.04466900 | -1.20163800 | 1.37349200  |
| C  | -6.08526100 | -1.28692200 | -1.04939400 |
| C  | -6.76797500 | -1.25266400 | 0.17463000  |
| H  | -4.07205000 | -1.15323500 | 2.27299600  |
| H  | -4.14546600 | -1.28281600 | -2.02288000 |
| H  | -7.85840800 | -1.26439500 | 0.19251800  |
| C  | 0.08527500  | 2.95284000  | -0.12327000 |
| C  | 0.09470100  | 3.67828200  | 1.06868900  |
| C  | 0.09126200  | 3.62176500  | -1.34916300 |
| C  | 0.11037200  | 5.07913000  | 1.04167000  |
| C  | 0.10571400  | 5.02485400  | -1.38180200 |
| C  | 0.11563700  | 5.75544500  | -0.18500100 |
| H  | 0.08928400  | 3.14334000  | 2.01880500  |
| H  | 0.08352800  | 3.04331900  | -2.27419200 |
| H  | 0.12690900  | 6.84574700  | -0.21040000 |
| C  | 0.10896500  | 5.72590000  | -2.62853300 |
| C  | -6.82761000 | -1.34373200 | -2.26956300 |
| C  | 0.11971100  | 5.80513200  | 2.27207800  |
| C  | -6.72810000 | -1.15587100 | 2.62790900  |
| C  | 6.76437800  | -1.34762300 | 2.59635000  |
| C  | 6.83864600  | -1.54063600 | -2.30139800 |
| C  | 0.02350400  | -3.11914200 | -1.11784500 |
| C  | -1.26182400 | -3.88090600 | -0.99038100 |
| H  | -1.07591200 | -4.95980500 | -1.12634600 |
| H  | -1.72371100 | -3.77481300 | 0.00256600  |
| H  | -2.00811200 | -3.59140700 | -1.74203700 |
| H  | 0.77443600  | -3.43102700 | -0.37411000 |
| H  | 0.48527800  | -3.21475000 | -2.11680800 |
| N  | 0.11072700  | 6.31464800  | -3.63356800 |
| N  | 0.12678500  | 6.37319500  | 3.28829600  |
| N  | -7.43992600 | -1.39323600 | -3.25869700 |
| N  | -7.26992400 | -1.11357100 | 3.65760500  |
| N  | 7.31442200  | -1.31638400 | 3.62215200  |
| N  | 7.44284300  | -1.60314300 | -3.29475500 |
| Ni | 0.01955500  | -1.01786300 | 1.26513200  |
| Ni | 0.00296300  | -1.18107600 | -1.07860300 |

INT4

0 3

|   |            |            |             |
|---|------------|------------|-------------|
| O | 0.02622200 | 1.08794200 | -1.30096200 |
| C | 0.07790600 | 1.53182800 | -0.11780800 |



|    |             |             |             |
|----|-------------|-------------|-------------|
| O  | 0.11318500  | 0.83150500  | 0.92633400  |
| O  | -1.90449400 | -1.08782300 | 0.73896000  |
| C  | -2.48428100 | -1.10787800 | -0.38499700 |
| O  | -1.90699500 | -1.12341200 | -1.50901200 |
| O  | 1.94451700  | -1.15420400 | -1.49867100 |
| C  | 2.51435500  | -1.24547900 | -0.37431400 |
| O  | 1.92907000  | -1.29091900 | 0.74598000  |
| C  | 4.00212000  | -1.30067200 | -0.35257500 |
| C  | 4.72234500  | -1.19290300 | -1.54278600 |
| C  | 4.67387600  | -1.44878900 | 0.86184800  |
| C  | 6.12336200  | -1.23170100 | -1.51791200 |
| C  | 6.07393100  | -1.49240100 | 0.88925300  |
| C  | 6.80254000  | -1.38279500 | -0.30192200 |
| H  | 4.18625800  | -1.07437100 | -2.48511500 |
| H  | 4.10012800  | -1.52803400 | 1.78558200  |
| H  | 7.89254400  | -1.41292100 | -0.28331500 |
| C  | -3.97166700 | -1.13149100 | -0.36598100 |
| C  | -4.64875600 | -1.26881000 | 0.84707100  |
| C  | -4.68629000 | -1.01974100 | -1.55899800 |
| C  | -6.04947300 | -1.29692100 | 0.86960200  |
| C  | -6.08757600 | -1.03822800 | -1.53829700 |
| C  | -6.77249300 | -1.17877800 | -0.32433300 |
| H  | -4.07871900 | -1.35402900 | 1.77293600  |
| H  | -4.14558900 | -0.91387700 | -2.50020600 |
| H  | -7.86284500 | -1.19546200 | -0.30926700 |
| C  | 0.09585000  | 3.01760300  | 0.05506900  |
| C  | 0.10242000  | 3.55474600  | 1.34241700  |
| C  | 0.10147400  | 3.86539200  | -1.05459700 |
| C  | 0.11196800  | 4.94366100  | 1.52789400  |
| C  | 0.11602400  | 5.25733800  | -0.87492700 |
| C  | 0.12010300  | 5.79850200  | 0.41839700  |
| H  | 0.09792600  | 2.88121400  | 2.20027800  |
| H  | 0.09476000  | 3.43395900  | -2.05653800 |
| H  | 0.12896700  | 6.88001800  | 0.55882200  |
| C  | 0.12621000  | 6.13831600  | -2.00154400 |
| C  | -6.82011700 | -0.90930800 | -2.75642700 |
| C  | 0.11053500  | 5.47478800  | 2.85367700  |
| C  | -6.73757900 | -1.44578800 | 2.11187200  |
| C  | 6.75342400  | -1.64669600 | 2.13544300  |
| C  | 6.86380300  | -1.11189700 | -2.73247600 |
| N  | 0.13547200  | 6.87125400  | -2.90681400 |
| N  | 0.10652600  | 5.88228900  | 3.94420000  |
| N  | -7.41441800 | -0.80008900 | -3.75090800 |
| N  | -7.28953000 | -1.56975600 | 3.12910000  |
| N  | 7.29481500  | -1.77362500 | 3.15790900  |
| N  | 7.46823400  | -1.01106700 | -3.72183700 |
| Ni | 0.00644700  | -1.20231200 | 0.81420600  |
| Ni | 0.02027400  | -0.86881800 | -1.52638900 |
| C  | -0.00466600 | -3.12851700 | 0.40171700  |
| C  | -0.05943700 | -1.96855700 | 3.31804500  |
| H  | 0.45186600  | -3.20771900 | -0.60260400 |
| H  | 0.74394200  | -3.48833000 | 1.12210400  |
| C  | -1.30357500 | -3.87391600 | 0.48667900  |
| C  | -0.02581800 | -0.63310800 | 3.35624100  |
| H  | -1.00352300 | -2.51919300 | 3.28618400  |
| H  | 0.85526500  | -2.56618200 | 3.35748500  |
| H  | -1.83335400 | -3.71074700 | 1.43602500  |
| H  | -1.99710700 | -3.62492200 | -0.32827900 |
| H  | -1.11949700 | -4.95916200 | 0.41254500  |
| H  | -0.93797700 | -0.03194700 | 3.33333300  |

H 0.91590600 -0.08119700 3.40656200

TS4-5

0 3

O 0.01807600 1.15276600 -1.23772700  
C 0.13673300 1.57423400 -0.05889200  
O 0.23965200 0.85699800 0.97637500  
O -1.98138900 -0.97155200 0.70837200  
C -2.51004800 -1.03355200 -0.43095200  
O -1.89012600 -1.07759700 -1.53422600  
O 1.92694700 -1.12294700 -1.51308900  
C 2.53587300 -1.29288900 -0.41484800  
O 1.99775300 -1.41539000 0.71428400  
C 4.02231700 -1.34176100 -0.44924300  
C 4.72425000 -1.16617300 -1.64015600  
C 4.71101700 -1.53097200 0.74740500  
C 6.12557900 -1.17682600 -1.62536800  
C 6.10907500 -1.54519800 0.76073700  
C 6.82432400 -1.36756400 -0.42726500  
H 4.17711400 -1.01073300 -2.57087000  
H 4.14775000 -1.65773000 1.67166100  
H 7.91472400 -1.37034800 -0.42229300  
C -3.99613500 -1.07407400 -0.46797700  
C -4.69295600 -1.24559100 0.72707300  
C -4.68899100 -0.92980400 -1.66780000  
C -6.09095900 -1.28603500 0.72677400  
C -6.08995400 -0.94376900 -1.66331400  
C -6.79725900 -1.12844600 -0.46966800  
H -4.13730600 -1.34722300 1.65968800  
H -4.13520300 -0.79428700 -2.59768500  
H -7.88752300 -1.14543400 -0.47436000  
C 0.14967100 3.05434600 0.15482900  
C 0.15313400 3.55015600 1.45768400  
C 0.14100300 3.93749600 -0.92762900  
C 0.13986600 4.93128500 1.68849300  
C 0.14080500 5.32331800 -0.70160500  
C 0.13707300 5.82235600 0.60902500  
H 0.15968000 2.85019100 2.29340600  
H 0.13400600 3.53880400 -1.94317000  
H 0.12971600 6.89878500 0.78422000  
C 0.14087900 6.25114700 -1.79055000  
C -6.80958500 -0.75501400 -2.87592300  
C 0.11934200 5.40353800 3.03487100  
C -6.77675400 -1.48871200 1.95743800  
C 6.78041600 -1.72760800 2.00228100  
C 6.85945200 -0.97593700 -2.82819000  
N 0.14234700 7.03587200 -2.65152800  
N 0.09432800 5.74128300 4.14825300  
N -7.40641000 -0.58786700 -3.85888400  
N -7.30064000 -1.66471900 2.98010000  
N 7.28353700 -1.87380300 3.03987600  
N 7.47607100 -0.80415000 -3.79834400  
Ni 0.01764900 -1.11437400 0.95236800  
Ni 0.02438500 -0.80757800 -1.50296300  
C -0.16114400 -3.29394500 0.81664200  
C -0.30897100 -2.43408900 2.70562400  
H -0.16091300 -2.80767900 -0.18059200  
H 0.82534400 -3.74377900 0.96576600  
C -1.32040400 -4.22905000 0.93580800  
C 0.06522300 -1.10374900 2.97851500

|   |             |             |            |
|---|-------------|-------------|------------|
| H | -1.37084100 | -2.67064700 | 2.80989400 |
| H | 0.36624500  | -3.22913700 | 3.03304700 |
| H | -1.31519500 | -4.79694300 | 1.87631300 |
| H | -2.28394900 | -3.70568200 | 0.86075200 |
| H | -1.29059600 | -4.96498600 | 0.11691200 |
| H | -0.69434100 | -0.34599700 | 3.18315700 |
| H | 1.09516700  | -0.84974500 | 3.23966100 |

INT5

0 3

|    |             |             |             |
|----|-------------|-------------|-------------|
| O  | 0.03256700  | 1.38907900  | -1.19702300 |
| C  | 0.01058200  | 1.66910300  | 0.03040700  |
| O  | -0.01821900 | 0.82955100  | 0.97456000  |
| O  | -1.91541000 | -1.39166200 | 0.45557100  |
| C  | -2.48643400 | -1.11001300 | -0.63998000 |
| O  | -1.90065100 | -0.80277700 | -1.71502800 |
| O  | 1.92382100  | -0.83647200 | -1.70864500 |
| C  | 2.50045000  | -1.12019900 | -0.62169100 |
| O  | 1.92111600  | -1.36147500 | 0.47842700  |
| C  | 3.98975100  | -1.16217400 | -0.61330600 |
| C  | 4.70864300  | -0.86388700 | -1.77211100 |
| C  | 4.66545700  | -1.46553600 | 0.57015700  |
| C  | 6.11063700  | -0.86578300 | -1.74564500 |
| C  | 6.06629100  | -1.47038400 | 0.60019700  |
| C  | 6.79236400  | -1.16997700 | -0.55945700 |
| H  | 4.17019800  | -0.62144500 | -2.68917600 |
| H  | 4.09304700  | -1.68922600 | 1.47075200  |
| H  | 7.88275700  | -1.16690400 | -0.53890600 |
| C  | -3.97598000 | -1.13129500 | -0.63838800 |
| C  | -4.66118600 | -1.42719800 | 0.54159400  |
| C  | -4.68536700 | -0.81999400 | -1.79967000 |
| C  | -6.06207800 | -1.41121500 | 0.56556900  |
| C  | -6.08731900 | -0.80314500 | -1.77974400 |
| C  | -6.77856400 | -1.09927700 | -0.59699900 |
| H  | -4.09622400 | -1.65983900 | 1.44474100  |
| H  | -4.13943000 | -0.58270500 | -2.71366200 |
| H  | -7.86888400 | -1.08079800 | -0.58129800 |
| C  | 0.01953300  | 3.11319700  | 0.41468400  |
| C  | 0.01720500  | 3.46301800  | 1.76493400  |
| C  | 0.03121100  | 4.10827300  | -0.56490000 |
| C  | 0.02716300  | 4.81184600  | 2.14375700  |
| C  | 0.03942600  | 5.46059600  | -0.19044100 |
| C  | 0.03776700  | 5.81443200  | 1.16612600  |
| H  | 0.00873000  | 2.67595700  | 2.51947000  |
| H  | 0.03360400  | 3.82192500  | -1.61756900 |
| H  | 0.04492700  | 6.86538500  | 1.45737700  |
| C  | 0.04944900  | 6.49179000  | -1.18074300 |
| C  | -6.81941700 | -0.47047900 | -2.96035800 |
| C  | 0.02690500  | 5.14890900  | 3.53124700  |
| C  | -6.75240500 | -1.69987000 | 1.78254400  |
| C  | 6.74686900  | -1.76888500 | 1.82027600  |
| C  | 6.85269800  | -0.54390800 | -2.92303200 |
| N  | 0.05719900  | 7.34627300  | -1.97201500 |
| N  | 0.02698000  | 5.39435500  | 4.66909800  |
| N  | -7.42113400 | -0.19374600 | -3.91764500 |
| N  | -7.29956800 | -1.93135800 | 2.78373000  |
| N  | 7.28597000  | -2.00868500 | 2.82388000  |
| N  | 7.46276300  | -0.27551900 | -3.87741500 |
| Ni | -0.00201600 | -1.13130700 | 0.61965800  |
| Ni | 0.01476900  | -0.51861100 | -1.72274500 |

|   |             |             |            |
|---|-------------|-------------|------------|
| C | 0.25312900  | -4.01072300 | 1.68578400 |
| C | -0.50346300 | -3.07910000 | 2.62821500 |
| H | 0.10985800  | -3.66579600 | 0.64102400 |
| H | 1.33676900  | -3.91385400 | 1.86747500 |
| C | -0.17959800 | -5.45636800 | 1.79650300 |
| C | -0.03750500 | -1.66741800 | 2.60136000 |
| H | -1.58522300 | -3.12902800 | 2.42131500 |
| H | -0.39397000 | -3.45684800 | 3.66660200 |
| H | -0.00580700 | -5.84726600 | 2.80946900 |
| H | -1.25193500 | -5.57504500 | 1.58406700 |
| H | 0.36736300  | -6.10322300 | 1.09855800 |
| H | -0.71150300 | -0.90168300 | 3.00173600 |
| H | 1.02009000  | -1.48713600 | 2.83278300 |

INT6

0 3

|   |             |             |             |
|---|-------------|-------------|-------------|
| O | -0.11432000 | 0.75562100  | 1.08382800  |
| C | -0.14476500 | 1.56913100  | 0.11620300  |
| O | -0.12290900 | 1.26025400  | -1.10338800 |
| O | 1.86164900  | -0.82643300 | -1.70989200 |
| C | 2.49304600  | -1.01462800 | -0.63035300 |
| O | 1.97087100  | -1.25137200 | 0.49318100  |
| O | -1.96394900 | -1.48483300 | 0.54942400  |
| C | -2.53005400 | -1.26500900 | -0.55527000 |
| O | -1.94200000 | -0.99220000 | -1.64227200 |
| C | -4.01784000 | -1.31490300 | -0.57704600 |
| C | -4.71390200 | -1.64033200 | 0.58742700  |
| C | -4.71465700 | -1.00031600 | -1.74369300 |
| C | -6.11441800 | -1.65404600 | 0.58840800  |
| C | -6.11600300 | -1.00488700 | -1.74258400 |
| C | -6.82032100 | -1.33423300 | -0.57770500 |
| H | -4.15691900 | -1.87475200 | 1.49490000  |
| H | -4.15990800 | -0.74076900 | -2.64607600 |
| H | -7.91082700 | -1.33513600 | -0.57788000 |
| C | 3.97929700  | -0.93894200 | -0.67808500 |
| C | 4.63467800  | -0.58712800 | -1.85844500 |
| C | 4.71357100  | -1.18874200 | 0.48126400  |
| C | 6.03229400  | -0.47862900 | -1.87450500 |
| C | 6.11029600  | -1.09258800 | 0.46456700  |
| C | 6.77459500  | -0.73450700 | -0.71430100 |
| H | 4.05031900  | -0.38687200 | -2.75740200 |
| H | 4.18919800  | -1.45015800 | 1.40067300  |
| H | 7.86161400  | -0.64855300 | -0.72901400 |
| C | -0.21209600 | 3.02201900  | 0.46062200  |
| C | -0.26885800 | 3.98294100  | -0.55096200 |
| C | -0.21737200 | 3.41586500  | 1.79876800  |
| C | -0.33213500 | 5.34548000  | -0.22248400 |
| C | -0.27817000 | 4.77583600  | 2.13198600  |
| C | -0.33622300 | 5.74402600  | 1.12141700  |
| H | -0.26368100 | 3.66113000  | -1.59326600 |
| H | -0.17325600 | 2.65536300  | 2.57897100  |
| H | -0.38434600 | 6.80286400  | 1.37824800  |
| C | -0.27998000 | 5.16602200  | 3.50581900  |
| C | -0.39314700 | 6.33730700  | -1.25055300 |
| C | 6.84329400  | -1.35087900 | 1.66046100  |
| C | 6.70985000  | -0.08952400 | -3.06809000 |
| C | -6.83057100 | -0.65587600 | -2.92642700 |
| C | -6.81736100 | -1.98191200 | 1.78576500  |
| N | -0.27953800 | 5.46460500  | 4.63100100  |
| N | -0.44412800 | 7.15445500  | -2.07885200 |

|    |             |             |             |
|----|-------------|-------------|-------------|
| N  | 7.41611600  | -1.56545600 | 2.65009700  |
| N  | 7.27087300  | 0.23812300  | -4.03323600 |
| N  | -7.41207200 | -0.36039700 | -3.88966200 |
| N  | -7.37715400 | -2.24779700 | 2.77056300  |
| Ni | -0.05258400 | -0.64757400 | -1.63866800 |
| Ni | -0.00294300 | -1.18536000 | 0.73457200  |
| C  | 1.44919100  | -3.85680800 | 2.37532000  |
| C  | 0.15786700  | -3.11271700 | 2.06656900  |
| H  | 1.44673200  | -4.10882600 | 3.44796600  |
| H  | 2.29360400  | -3.16451400 | 2.23396400  |
| C  | 1.64173400  | -5.10047000 | 1.53614000  |
| C  | 0.03204600  | -1.75585800 | 2.64113400  |
| H  | -0.74305900 | -3.71855900 | 2.26591700  |
| H  | 0.80593100  | -5.80598500 | 1.65120800  |
| H  | 1.71606700  | -4.85386200 | 0.46582500  |
| H  | 2.55935400  | -5.63618400 | 1.81012200  |
| H  | -0.92653600 | -1.42769800 | 3.05224100  |
| H  | 0.91805800  | -1.29709100 | 3.09306400  |
| H  | 0.09567600  | -3.05543000 | 0.92059700  |

TS6-7

0 3

|   |             |             |             |
|---|-------------|-------------|-------------|
| O | -0.19920400 | 0.75251400  | 1.10357400  |
| C | -0.17535600 | 1.51472400  | 0.09667400  |
| O | -0.10260300 | 1.14568200  | -1.10618800 |
| O | 1.85649800  | -0.96904700 | -1.67221000 |
| C | 2.48501900  | -0.98024400 | -0.57481000 |
| O | 1.96101800  | -1.02222400 | 0.56930100  |
| O | -1.98936200 | -1.42797600 | 0.61521000  |
| C | -2.54427000 | -1.29814400 | -0.50617600 |
| O | -1.94753700 | -1.10512400 | -1.60581400 |
| C | -4.03134900 | -1.35441100 | -0.53350700 |
| C | -4.72994000 | -1.63624500 | 0.64041500  |
| C | -4.72400200 | -1.08639400 | -1.71345800 |
| C | -6.12993500 | -1.65412200 | 0.63710400  |
| C | -6.12522300 | -1.09141000 | -1.71496700 |
| C | -6.83304400 | -1.37872200 | -0.54157400 |
| H | -4.17574800 | -1.83388300 | 1.55820800  |
| H | -4.16736400 | -0.86080700 | -2.62375800 |
| H | -7.92352100 | -1.38082900 | -0.54509000 |
| C | 3.97147700  | -0.93862200 | -0.62744800 |
| C | 4.63122100  | -0.66306200 | -1.82455400 |
| C | 4.70170000  | -1.15537400 | 0.54074300  |
| C | 6.03069500  | -0.58984300 | -1.84645700 |
| C | 6.10051800  | -1.10763500 | 0.51473500  |
| C | 6.77035500  | -0.81838500 | -0.67949300 |
| H | 4.05053800  | -0.49225500 | -2.73188500 |
| H | 4.17367100  | -1.35647300 | 1.47310500  |
| H | 7.85934100  | -0.76562800 | -0.70121700 |
| C | -0.23456200 | 2.98371300  | 0.36592200  |
| C | -0.27585100 | 3.90054500  | -0.68707300 |
| C | -0.24099500 | 3.43588700  | 1.68503500  |
| C | -0.32697500 | 5.27706500  | -0.41734700 |
| C | -0.28432700 | 4.80893400  | 1.95933100  |
| C | -0.32940600 | 5.73331500  | 0.90844000  |
| H | -0.26827900 | 3.53496700  | -1.71486000 |
| H | -0.20847200 | 2.70952300  | 2.49749900  |
| H | -0.36514800 | 6.80285500  | 1.11886400  |
| C | -0.27706400 | 5.24825000  | 3.31753600  |
| C | -0.37615300 | 6.23181000  | -1.48133400 |

|    |             |             |             |
|----|-------------|-------------|-------------|
| C  | 6.83120500  | -1.34822600 | 1.71491500  |
| C  | 6.71102600  | -0.26324100 | -3.05563100 |
| C  | -6.83611100 | -0.78248500 | -2.91100100 |
| C  | -6.83384700 | -1.93983400 | 1.84377600  |
| N  | -0.26539600 | 5.57292300  | 4.43515700  |
| N  | -0.41819900 | 7.02909300  | -2.32953300 |
| N  | 7.40370600  | -1.55211800 | 2.70672200  |
| N  | 7.27068200  | 0.01855600  | -4.03540100 |
| N  | -7.41463300 | -0.51658200 | -3.88420200 |
| N  | -7.39224900 | -2.17139300 | 2.83764300  |
| Ni | -0.05574200 | -0.78208200 | -1.56570200 |
| Ni | -0.01298700 | -1.18791300 | 0.82012700  |
| C  | 1.54635000  | -3.50494400 | 2.37795400  |
| C  | 0.20423400  | -2.83177600 | 2.32780800  |
| H  | 1.55361000  | -4.09316300 | 3.31239800  |
| H  | 2.32600500  | -2.73951200 | 2.50740200  |
| C  | 1.86620900  | -4.40861800 | 1.20654600  |
| C  | -0.02899700 | -1.58387800 | 2.88866200  |
| H  | -0.66350100 | -3.49449300 | 2.20361300  |
| H  | 1.08702900  | -5.16951100 | 1.05332600  |
| H  | 1.95383600  | -3.83616700 | 0.27005700  |
| H  | 2.81503000  | -4.93999900 | 1.35495900  |
| H  | -1.03820700 | -1.25449300 | 3.14165900  |
| H  | 0.80191800  | -0.98945000 | 3.27898000  |
| H  | 0.12022900  | -2.64651600 | 0.61454300  |

#### INT7

0 1

|   |             |             |             |
|---|-------------|-------------|-------------|
| O | -0.25982300 | 0.82634200  | 1.11200400  |
| C | -0.20665500 | 1.55379000  | 0.08875100  |
| O | -0.10581300 | 1.12430900  | -1.09414800 |
| O | 1.90424500  | -0.85942600 | -1.50919500 |
| C | 2.50276600  | -0.86695500 | -0.38857900 |
| O | 1.98160300  | -0.90594300 | 0.75392900  |
| O | -2.03232100 | -1.38756900 | 0.78996600  |
| C | -2.55455800 | -1.26180300 | -0.34477400 |
| O | -1.96003700 | -1.07392000 | -1.45252200 |
| C | -4.04221700 | -1.31912200 | -0.40126800 |
| C | -4.75653800 | -1.54502800 | 0.77322500  |
| C | -4.71715400 | -1.11135200 | -1.60204800 |
| C | -6.15484100 | -1.56520700 | 0.74954500  |
| C | -6.11734100 | -1.12437500 | -1.62248800 |
| C | -6.84341900 | -1.35367500 | -0.44889900 |
| H | -4.21496900 | -1.69527100 | 1.70709000  |
| H | -4.14931000 | -0.92752100 | -2.51451700 |
| H | -7.93362200 | -1.35970500 | -0.46828500 |
| C | 3.99081000  | -0.84301700 | -0.43556600 |
| C | 4.66166000  | -0.64704500 | -1.64049000 |
| C | 4.70885100  | -1.01426300 | 0.74601400  |
| C | 6.06146000  | -0.61392200 | -1.65719300 |
| C | 6.10741300  | -1.00402800 | 0.72352500  |
| C | 6.79173100  | -0.79845100 | -0.47825200 |
| H | 4.09032900  | -0.51164800 | -2.55932700 |
| H | 4.17066000  | -1.15289800 | 1.68395400  |
| H | 7.88178000  | -0.77898300 | -0.49717400 |
| C | -0.25876800 | 3.03369100  | 0.28259500  |
| C | -0.27989900 | 3.89697700  | -0.81500800 |
| C | -0.27354200 | 3.55019500  | 1.57811300  |
| C | -0.32019300 | 5.28540200  | -0.61488600 |
| C | -0.30324000 | 4.93591600  | 1.78330100  |

|    |             |             |             |
|----|-------------|-------------|-------------|
| C  | -0.32939000 | 5.80668400  | 0.68658200  |
| H  | -0.26476200 | 3.48195200  | -1.82368600 |
| H  | -0.25621800 | 2.86419500  | 2.42567900  |
| H  | -0.35496600 | 6.88570500  | 0.84329100  |
| C  | -0.29884000 | 5.44751900  | 3.11645500  |
| C  | -0.34940600 | 6.18301800  | -1.72799500 |
| C  | 6.82213000  | -1.20694900 | 1.93637800  |
| C  | 6.74960400  | -0.38060400 | -2.87960500 |
| C  | -6.81027700 | -0.88308400 | -2.84095800 |
| C  | -6.86615800 | -1.78707500 | 1.96114600  |
| N  | -0.28793100 | 5.83889800  | 4.21264000  |
| N  | -0.37458500 | 6.92968000  | -2.62164700 |
| N  | 7.37795100  | -1.38512800 | 2.94121000  |
| N  | 7.31116900  | -0.17883600 | -3.87651200 |
| N  | -7.37627700 | -0.67367600 | -3.83392100 |
| N  | -7.42016400 | -1.96483600 | 2.96703900  |
| Ni | -0.03999700 | -0.81017000 | -1.48620000 |
| Ni | -0.01894400 | -1.16494700 | 1.08456600  |
| C  | 1.55750200  | -3.95174600 | 1.42288400  |
| C  | 0.24825700  | -3.33949500 | 1.79924000  |
| H  | 1.63264600  | -4.88209600 | 2.01617800  |
| H  | 2.38075100  | -3.31511000 | 1.78275900  |
| C  | 1.72617800  | -4.29381300 | -0.04389100 |
| C  | 0.07279600  | -2.43297200 | 2.80261800  |
| H  | -0.64743300 | -3.78036000 | 1.34159300  |
| H  | 0.90354100  | -4.92648100 | -0.40784100 |
| H  | 1.75133700  | -3.39777800 | -0.68006800 |
| H  | 2.66012000  | -4.84381400 | -0.21772000 |
| H  | -0.92448800 | -2.20152900 | 3.18654200  |
| H  | 0.93008300  | -2.05953300 | 3.37342000  |
| H  | 0.04856200  | -1.94416500 | -0.31890700 |

## H-Cu-DHKUST-1

### INT1

0 1

|    |             |             |             |
|----|-------------|-------------|-------------|
| O  | 0.00009300  | 0.89484200  | -1.34812500 |
| C  | -0.00003900 | 1.33551800  | -0.15933100 |
| O  | -0.00014100 | 0.63206700  | 0.88413700  |
| O  | -1.91355900 | -1.67088900 | 1.07040200  |
| C  | -2.48869100 | -1.49255900 | -0.03943000 |
| O  | -1.91944800 | -1.28977300 | -1.15228900 |
| O  | 1.91955800  | -1.28984800 | -1.15225000 |
| C  | 2.48875800  | -1.49250400 | -0.03934600 |
| O  | 1.91358300  | -1.67071300 | 1.07048300  |
| C  | 3.97960900  | -1.50881300 | -0.04033000 |
| C  | 4.68800900  | -1.44486200 | -1.24305100 |
| C  | 4.66298700  | -1.57196200 | 1.17536400  |
| C  | 6.09061000  | -1.45431400 | -1.22922600 |
| C  | 6.06395300  | -1.56344900 | 1.19312000  |
| C  | 6.78009800  | -1.50930800 | -0.00968900 |
| H  | 4.14486900  | -1.38909800 | -2.18698000 |
| H  | 4.09971100  | -1.61883900 | 2.10760300  |
| H  | 7.87067500  | -1.50738300 | 0.00192600  |
| C  | -3.97954200 | -1.50888200 | -0.04046900 |
| C  | -4.66295100 | -1.57250900 | 1.17518100  |
| C  | -4.68791200 | -1.44447500 | -1.24318400 |
| C  | -6.06391700 | -1.56403700 | 1.19290500  |
| C  | -6.09051400 | -1.45392600 | -1.22939600 |
| C  | -6.78003300 | -1.50941800 | -0.00989900 |
| H  | -4.09969900 | -1.61973600 | 2.10741700  |
| H  | -4.14474700 | -1.38834500 | -2.18707700 |
| H  | -7.87061000 | -1.50750800 | 0.00168800  |
| C  | -0.00007400 | 2.82610900  | -0.00667200 |
| C  | -0.00035400 | 3.41313300  | 1.26062600  |
| C  | 0.00018100  | 3.62971500  | -1.14668800 |
| C  | -0.00038800 | 4.81150000  | 1.38789100  |
| C  | 0.00016900  | 5.02559700  | -1.02606500 |
| C  | -0.00012000 | 5.61989200  | 0.24194600  |
| H  | -0.00055100 | 2.77300100  | 2.14410500  |
| H  | 0.00039400  | 3.15812400  | -2.12986500 |
| H  | -0.00013700 | 6.70617300  | 0.33931000  |
| C  | 0.00045800  | 5.82544700  | -2.20879300 |
| C  | -6.82841700 | -1.40569200 | -2.45372100 |
| C  | -0.00069700 | 5.43440400  | 2.67626400  |
| C  | -6.75187200 | -1.60243100 | 2.44441500  |
| C  | 6.75188600  | -1.60130300 | 2.44466000  |
| C  | 6.82853600  | -1.40659500 | -2.45355700 |
| N  | 0.00070200  | 6.44572200  | -3.19372200 |
| N  | -0.00095600 | 5.96841900  | 3.71184500  |
| N  | -7.44207900 | -1.37138300 | -3.44296400 |
| N  | -7.29291200 | -1.62569500 | 3.47483200  |
| N  | 7.29291800  | -1.62410900 | 3.47509100  |
| N  | 7.44220700  | -1.37271900 | -3.44280900 |
| H  | 0.00004600  | -2.39315500 | -0.30280800 |
| Cu | 0.00006000  | -1.10227100 | -1.23442900 |
| Cu | 0.00000200  | -1.51448900 | 1.14369600  |

### INT2

0 1

|   |            |            |             |
|---|------------|------------|-------------|
| O | 0.00654200 | 0.50656100 | 0.88703100  |
| C | 0.00551300 | 1.22017900 | -0.14672500 |



|    |             |             |             |
|----|-------------|-------------|-------------|
| O  | -0.00286200 | 0.79633500  | -1.34146000 |
| O  | 1.90744800  | -1.36478500 | -1.31897000 |
| C  | 2.51768600  | -1.52195000 | -0.22228700 |
| O  | 1.98971500  | -1.73395500 | 0.90117500  |
| O  | -2.00379700 | -1.71828200 | 0.90052900  |
| C  | -2.53322200 | -1.50711200 | -0.22258900 |
| O  | -1.92429600 | -1.35603000 | -1.32073300 |
| C  | -4.02294800 | -1.37995400 | -0.28035000 |
| C  | -4.75342800 | -1.27532100 | 0.90415900  |
| C  | -4.67605200 | -1.30883400 | -1.51448300 |
| C  | -6.14179300 | -1.08232300 | 0.85876600  |
| C  | -6.06820900 | -1.14170500 | -1.56536000 |
| C  | -6.80168500 | -1.02218200 | -0.37621300 |
| H  | -4.23385800 | -1.32434300 | 1.86157300  |
| H  | -4.09494400 | -1.37781500 | -2.43456800 |
| H  | -7.88173400 | -0.87467200 | -0.41239000 |
| C  | 4.00774700  | -1.40087900 | -0.28381100 |
| C  | 4.65691300  | -1.33837700 | -1.52036500 |
| C  | 4.74249300  | -1.29229200 | 0.89777600  |
| C  | 6.04929100  | -1.17624200 | -1.57693300 |
| C  | 6.13132500  | -1.10330000 | 0.84648800  |
| C  | 6.78720300  | -1.05220300 | -0.39109400 |
| H  | 4.07251700  | -1.41010800 | -2.43812400 |
| H  | 4.22615900  | -1.33454700 | 1.85728000  |
| H  | 7.86753700  | -0.90799400 | -0.43171200 |
| C  | 0.01479700  | 2.71060400  | 0.01482200  |
| C  | 0.00473200  | 3.50485000  | -1.13008300 |
| C  | 0.03359800  | 3.30920800  | 1.27690000  |
| C  | 0.01276200  | 4.90023000  | -1.02289300 |
| C  | 0.04292700  | 4.70967100  | 1.39016600  |
| C  | 0.03211900  | 5.50798000  | 0.23699500  |
| H  | -0.00957400 | 3.02511900  | -2.10889500 |
| H  | 0.04139000  | 2.67811900  | 2.16701100  |
| H  | 0.03895400  | 6.59501100  | 0.32466500  |
| C  | 0.06396300  | 5.35976200  | 2.66487200  |
| C  | 0.00085800  | 5.66975500  | -2.22268000 |
| C  | 6.87212400  | -0.93739700 | 2.05821300  |
| C  | 6.71968400  | -1.11973100 | -2.84083300 |
| C  | -6.74429700 | -1.07579300 | -2.82595000 |
| C  | -6.87665500 | -0.92231400 | 2.07478800  |
| N  | 0.08160200  | 5.93666200  | 3.67714500  |
| N  | -0.00984700 | 6.23806600  | -3.23747900 |
| N  | 7.46467500  | -0.78467200 | 3.04915400  |
| N  | 7.27051200  | -1.07208900 | -3.86649800 |
| N  | -7.30187500 | -1.02022200 | -3.84762900 |
| N  | -7.46228100 | -0.77520300 | 3.07065300  |
| C  | -0.01091900 | -2.64363900 | 3.20581300  |
| C  | -0.00539600 | -1.30677500 | 3.39288500  |
| H  | -0.93230200 | -0.73724400 | 3.50042400  |
| H  | 0.92622000  | -0.74490600 | 3.49996100  |
| H  | -0.01051100 | -2.47858300 | -0.34799400 |
| H  | 0.91853900  | -3.21874600 | 3.16925000  |
| H  | -0.94504800 | -3.21115200 | 3.16970400  |
| Cu | -0.00690400 | -1.66421400 | 1.16353200  |
| Cu | -0.00798000 | -1.20055100 | -1.26815800 |

TS2-3

O 1

|   |             |            |             |
|---|-------------|------------|-------------|
| O | -0.03281900 | 0.57816600 | -1.00509100 |
| C | -0.01821300 | 1.26402200 | 0.05970000  |

|    |             |             |             |
|----|-------------|-------------|-------------|
| O  | 0.00116800  | 0.78713700  | 1.22454100  |
| O  | -1.87251800 | -1.43354200 | 1.15575500  |
| C  | -2.56113500 | -1.44521600 | 0.07542400  |
| O  | -2.11009900 | -1.56323700 | -1.07809400 |
| O  | 2.11757300  | -1.49331900 | -1.07652100 |
| C  | 2.57418200  | -1.40171000 | 0.07734700  |
| O  | 1.89042500  | -1.41812600 | 1.16045000  |
| C  | 4.04944200  | -1.25096700 | 0.23434000  |
| C  | 4.80872400  | -1.13338200 | -0.92768200 |
| C  | 4.66823100  | -1.20540200 | 1.48384100  |
| C  | 6.19412500  | -0.96484300 | -0.85029400 |
| C  | 6.05999200  | -1.04607800 | 1.56128100  |
| C  | 6.82721900  | -0.92322200 | 0.39543900  |
| H  | 4.30761200  | -1.16541200 | -1.89507900 |
| H  | 4.06786500  | -1.29024600 | 2.39057600  |
| H  | 7.90778900  | -0.79277800 | 0.46241500  |
| C  | -4.03540300 | -1.29080700 | 0.23728800  |
| C  | -4.64890000 | -1.24489900 | 1.48929700  |
| C  | -4.79873800 | -1.16743200 | -0.92153600 |
| C  | -6.03965300 | -1.08097600 | 1.57286000  |
| C  | -6.18279000 | -0.99006400 | -0.83787600 |
| C  | -6.81078400 | -0.94990500 | 0.41056000  |
| H  | -4.04522100 | -1.33354200 | 2.39343700  |
| H  | -4.30167500 | -1.20027600 | -1.89102800 |
| H  | -7.89035900 | -0.81382100 | 0.48219400  |
| C  | -0.02393100 | 2.75686700  | -0.06610400 |
| C  | -0.00953800 | 3.53009900  | 1.09567900  |
| C  | -0.04171700 | 3.37831500  | -1.31683300 |
| C  | -0.01259600 | 4.92910100  | 1.01473200  |
| C  | -0.04476700 | 4.78016700  | -1.40581200 |
| C  | -0.03017600 | 5.55674500  | -0.23779500 |
| H  | 0.00442700  | 3.03038900  | 2.06502200  |
| H  | -0.05282400 | 2.76500000  | -2.21914100 |
| H  | -0.03235300 | 6.64530000  | -0.30597200 |
| C  | -0.06201700 | 5.43737800  | -2.67781600 |
| C  | 0.00291400  | 5.70101800  | 2.21769600  |
| C  | -6.91987800 | -0.84193200 | -2.04646000 |
| C  | -6.69796400 | -1.03837300 | 2.83685100  |
| C  | 6.72465600  | -1.00023900 | 2.82192100  |
| C  | 6.92626600  | -0.82975600 | -2.06332300 |
| N  | -0.07559300 | 5.99646600  | -3.70029800 |
| N  | 0.01611900  | 6.30363500  | 3.21406800  |
| N  | -7.46338100 | -0.71914900 | -3.06659000 |
| N  | -7.26936800 | -1.00087200 | 3.84930200  |
| N  | 7.30305100  | -0.95925400 | 3.83028900  |
| N  | 7.46357800  | -0.72018200 | -3.08819700 |
| C  | 0.03828300  | -3.80482500 | -1.08874600 |
| C  | 0.03182600  | -3.27360100 | -2.36051100 |
| H  | 0.96699800  | -3.15722700 | -2.91688200 |
| H  | -0.90544400 | -3.18406600 | -2.91831900 |
| H  | 0.01666600  | -2.49973300 | 0.06399800  |
| H  | -0.88891200 | -4.16307900 | -0.63390000 |
| H  | 0.97425300  | -4.13685700 | -0.63188100 |
| Cu | 0.00214400  | -1.41295000 | -1.40982800 |
| Cu | 0.00801300  | -1.25481900 | 1.08346300  |

INT3

O 1

|   |            |            |             |
|---|------------|------------|-------------|
| O | 0.05892500 | 0.87582700 | -1.16659900 |
| C | 0.06758500 | 1.48844500 | -0.05751700 |

|    |             |             |             |
|----|-------------|-------------|-------------|
| O  | 0.05940400  | 0.95900000  | 1.07898000  |
| O  | -1.88009000 | -1.39934600 | 1.19618200  |
| C  | -2.47388600 | -1.24161500 | 0.09973500  |
| O  | -1.92106200 | -1.07149100 | -1.03402600 |
| O  | 1.93906900  | -1.18720400 | -1.04925700 |
| C  | 2.49512600  | -1.35538900 | 0.08264100  |
| O  | 1.90474000  | -1.48072400 | 1.18554000  |
| C  | 3.98682400  | -1.39759900 | 0.08919900  |
| C  | 4.70290700  | -1.42692800 | -1.10948300 |
| C  | 4.66567900  | -1.38525600 | 1.30998300  |
| C  | 6.10505800  | -1.45610300 | -1.08818400 |
| C  | 6.06727900  | -1.39289000 | 1.33538600  |
| C  | 6.78944600  | -1.43405900 | 0.13487800  |
| H  | 4.16553500  | -1.42605900 | -2.05838100 |
| H  | 4.09514900  | -1.35951100 | 2.23896200  |
| H  | 7.87988700  | -1.44549200 | 0.15181800  |
| C  | -3.96504100 | -1.25458300 | 0.11246500  |
| C  | -4.63770900 | -1.23080000 | 1.33656200  |
| C  | -4.68740800 | -1.27221700 | -1.08293000 |
| C  | -6.03890400 | -1.21478500 | 1.36886500  |
| C  | -6.08985200 | -1.27728000 | -1.05454700 |
| C  | -6.76763500 | -1.24351400 | 0.17195300  |
| H  | -4.06225600 | -1.21460500 | 2.26273300  |
| H  | -4.15529000 | -1.27904500 | -2.03502200 |
| H  | -7.85800600 | -1.23606100 | 0.19424100  |
| C  | 0.08698700  | 2.98607400  | -0.11338900 |
| C  | 0.09726700  | 3.70381900  | 1.08308700  |
| C  | 0.09089600  | 3.66436500  | -1.33357700 |
| C  | 0.11098500  | 5.10481200  | 1.06676500  |
| C  | 0.10439700  | 5.06791000  | -1.35568600 |
| C  | 0.11457200  | 5.79057400  | -0.15459300 |
| H  | 0.09350100  | 3.15895100  | 2.02765800  |
| H  | 0.08236300  | 3.09453600  | -2.26370800 |
| H  | 0.12460200  | 6.88102900  | -0.17230000 |
| C  | 0.10623100  | 5.77547600  | -2.59802800 |
| C  | -6.83346600 | -1.31193300 | -2.27532300 |
| C  | 0.11947600  | 5.82257000  | 2.30186800  |
| C  | -6.72169400 | -1.15928700 | 2.62385300  |
| C  | 6.75834600  | -1.34906100 | 2.58645000  |
| C  | 6.84071800  | -1.50528100 | -2.31324600 |
| C  | 0.03383900  | -3.09531900 | -1.17730500 |
| C  | -1.25156500 | -3.83898700 | -1.11550700 |
| H  | -1.03769200 | -4.91004100 | -1.28647600 |
| H  | -1.73512500 | -3.78059500 | -0.13104400 |
| H  | -1.97174200 | -3.53447700 | -1.88499100 |
| H  | 0.75050200  | -3.35453200 | -0.38762800 |
| H  | 0.53149200  | -3.09907100 | -2.16034300 |
| N  | 0.10691100  | 6.36675900  | -3.60142200 |
| N  | 0.12532100  | 6.38600200  | 3.32065700  |
| N  | -7.44182400 | -1.34491600 | -3.26781100 |
| N  | -7.26951700 | -1.10449500 | 3.64998700  |
| N  | 7.31489300  | -1.30364900 | 3.60841800  |
| N  | 7.44102400  | -1.55109100 | -3.31012500 |
| Cu | 0.02006700  | -1.08637400 | 1.39659800  |
| Cu | 0.00106400  | -1.10572100 | -1.12853800 |

INT4

O 1

|   |            |            |             |
|---|------------|------------|-------------|
| O | 0.02896700 | 1.15486100 | -1.37828700 |
| C | 0.04467200 | 1.54538100 | -0.18907300 |

|    |             |             |             |
|----|-------------|-------------|-------------|
| O  | 0.04992900  | 0.81518200  | 0.84704100  |
| O  | -1.93372200 | -1.19447200 | 0.68499600  |
| C  | -2.48338100 | -1.24277800 | -0.45998200 |
| O  | -1.88891600 | -1.26295300 | -1.56596300 |
| O  | 1.90719800  | -1.30409800 | -1.53897700 |
| C  | 2.49928500  | -1.30487400 | -0.43136500 |
| O  | 1.94856400  | -1.26127800 | 0.71311300  |
| C  | 3.99066600  | -1.34848400 | -0.42519500 |
| C  | 4.70401200  | -1.21393200 | -1.61787300 |
| C  | 4.67289000  | -1.49283200 | 0.78432400  |
| C  | 6.10650400  | -1.21360300 | -1.59727900 |
| C  | 6.07351600  | -1.51037400 | 0.80643100  |
| C  | 6.79438300  | -1.36651900 | -0.38551500 |
| H  | 4.16188600  | -1.09766400 | -2.55721300 |
| H  | 4.10702200  | -1.58745500 | 1.71133400  |
| H  | 7.88486800  | -1.36798900 | -0.37181000 |
| C  | -3.97502000 | -1.26561300 | -0.45518400 |
| C  | -4.66365900 | -1.39867000 | 0.75221600  |
| C  | -4.68176100 | -1.12174900 | -1.65046300 |
| C  | -6.06473500 | -1.39677800 | 0.76864900  |
| C  | -6.08388300 | -1.10025600 | -1.63534700 |
| C  | -6.77863100 | -1.24298900 | -0.42643500 |
| H  | -4.10320700 | -1.49793200 | 1.68248300  |
| H  | -4.13416000 | -1.01390400 | -2.58762400 |
| H  | -7.86906300 | -1.22836800 | -0.41680100 |
| C  | 0.05760700  | 3.02591000  | 0.05181700  |
| C  | 0.05875400  | 3.52786400  | 1.35334300  |
| C  | 0.06528500  | 3.90444500  | -1.03294900 |
| C  | 0.06586600  | 4.91242300  | 1.57520900  |
| C  | 0.07482100  | 5.29026800  | -0.81698400 |
| C  | 0.07449500  | 5.79733600  | 0.48956800  |
| H  | 0.05341500  | 2.83354500  | 2.19480300  |
| H  | 0.06352400  | 3.49724700  | -2.04492900 |
| H  | 0.08057400  | 6.87459900  | 0.65966700  |
| C  | 0.08425000  | 6.19327500  | -1.92479500 |
| C  | -6.81461000 | -0.91677300 | -2.84897400 |
| C  | 0.06248300  | 5.41500500  | 2.91196500  |
| C  | -6.75549400 | -1.54122700 | 2.01056300  |
| C  | 6.75381500  | -1.66558500 | 2.05264900  |
| C  | 6.84785100  | -1.04306000 | -2.80666700 |
| N  | 0.09220100  | 6.93467800  | -2.82274700 |
| N  | 0.05791700  | 5.80970100  | 4.00722700  |
| N  | -7.41844700 | -0.75534500 | -3.83099000 |
| N  | -7.30002400 | -1.66089100 | 3.03257000  |
| N  | 7.28509000  | -1.79371600 | 3.08051500  |
| N  | 7.46500600  | -0.89381900 | -3.78245000 |
| C  | -0.07270700 | -3.17698400 | 0.66442200  |
| C  | 0.65060200  | -0.77685700 | 3.44965700  |
| H  | -0.62436300 | -3.30576700 | -0.27628100 |
| H  | 0.98231400  | -3.44630200 | 0.54507500  |
| C  | -0.73742300 | -3.74633700 | 1.86775000  |
| C  | -0.68101100 | -0.67739600 | 3.45711400  |
| H  | 1.17106200  | -1.66302200 | 3.82564500  |
| H  | 1.28183600  | 0.03379100  | 3.07631700  |
| H  | -0.17186300 | -3.57654800 | 2.79359100  |
| H  | -1.76328000 | -3.37988600 | 2.00531100  |
| H  | -0.80748100 | -4.84342000 | 1.74593000  |
| H  | -1.32236000 | -1.47775800 | 3.83727900  |
| H  | -1.18863400 | 0.21660600  | 3.08556500  |
| Cu | 0.00690200  | -1.19245300 | 0.85258200  |

Cu 0.01699000 -0.88069900 -1.69886500

TS4-5

0 1

|   |             |             |             |
|---|-------------|-------------|-------------|
| O | 0.15918200  | 1.22668300  | -1.25137000 |
| C | 0.00061800  | 1.58730200  | -0.06761700 |
| O | -0.18459000 | 0.84307500  | 0.94323900  |
| O | -1.90195500 | -1.64387200 | 0.38405200  |
| C | -2.46859500 | -1.32523200 | -0.68710700 |
| O | -1.88253400 | -1.02082100 | -1.76847300 |
| O | 1.90491100  | -1.18380000 | -1.72457200 |
| C | 2.49746200  | -1.21723600 | -0.61018000 |
| O | 1.94179900  | -1.19852800 | 0.51785000  |
| C | 3.99304400  | -1.27661100 | -0.62049600 |
| C | 4.71089500  | -1.06680500 | -1.79919400 |
| C | 4.67425000  | -1.51325500 | 0.57475400  |
| C | 6.11423100  | -1.07804600 | -1.77626100 |
| C | 6.07486400  | -1.55123100 | 0.59945200  |
| C | 6.79892400  | -1.32697600 | -0.57847200 |
| H | 4.17145200  | -0.88024500 | -2.72894200 |
| H | 4.10301400  | -1.66463400 | 1.49107800  |
| H | 7.88934900  | -1.34019500 | -0.56448700 |
| C | -3.96609100 | -1.28243100 | -0.69165200 |
| C | -4.65974200 | -1.50523900 | 0.49922300  |
| C | -4.67127600 | -0.98644500 | -1.85930700 |
| C | -6.05909300 | -1.42649200 | 0.53317800  |
| C | -6.07243100 | -0.91525000 | -1.83483400 |
| C | -6.76933300 | -1.13319100 | -0.63820800 |
| H | -4.09731300 | -1.72889300 | 1.40671200  |
| H | -4.12121300 | -0.80510100 | -2.78379500 |
| H | -7.85787200 | -1.06874500 | -0.61920800 |
| C | 0.02978700  | 3.06094400  | 0.22190400  |
| C | 0.02325400  | 3.49561700  | 1.54563100  |
| C | 0.07612700  | 3.99602800  | -0.81536500 |
| C | 0.07079900  | 4.86272300  | 1.84478000  |
| C | 0.10676500  | 5.36922800  | -0.52184100 |
| C | 0.10813900  | 5.80496300  | 0.81110700  |
| H | -0.01295200 | 2.76021600  | 2.34898500  |
| H | 0.08630200  | 3.64606400  | -1.84876400 |
| H | 0.13948800  | 6.87115300  | 1.03820100  |
| C | 0.13827700  | 6.35116800  | -1.56175700 |
| C | -6.79934800 | -0.60756300 | -3.02604100 |
| C | 0.08562000  | 5.26267900  | 3.21398900  |
| C | -6.75275100 | -1.62997800 | 1.76674300  |
| C | 6.75191000  | -1.80975400 | 1.83161000  |
| C | 6.86108600  | -0.81996500 | -2.96722000 |
| N | 0.16100500  | 7.18344800  | -2.37650400 |
| N | 0.10261300  | 5.53315000  | 4.34572800  |
| N | -7.39832400 | -0.35382600 | -3.99171400 |
| N | -7.30262700 | -1.78900400 | 2.78129200  |
| N | 7.28111500  | -2.02492500 | 2.84660500  |
| N | 7.48371300  | -0.59746800 | -3.92567600 |
| C | 0.26091500  | -3.28186200 | 1.59319000  |
| C | 0.29940500  | -1.90334500 | 3.20258000  |
| H | 0.31476600  | -3.05263100 | 0.51796100  |
| H | 1.24784700  | -3.62388600 | 1.92133600  |
| C | -0.90267300 | -4.14333500 | 1.93729800  |
| C | -0.66836200 | -0.88591600 | 3.12856700  |
| H | 0.04170000  | -2.81988800 | 3.73694500  |
| H | 1.35162600  | -1.61642300 | 3.30086500  |

|    |             |             |             |
|----|-------------|-------------|-------------|
| H  | -0.88373000 | -4.50721500 | 2.97352100  |
| H  | -1.85772700 | -3.63398100 | 1.75427700  |
| H  | -0.89899300 | -5.03032900 | 1.28275100  |
| H  | -1.73032900 | -1.12579100 | 3.22758800  |
| H  | -0.39406500 | 0.16865300  | 3.18866700  |
| Cu | 0.00054200  | -1.12124900 | 1.20903300  |
| Cu | 0.02020300  | -0.77587600 | -1.68138900 |

#### INT5

0 1

|   |             |             |             |
|---|-------------|-------------|-------------|
| O | 0.14434700  | 1.25776300  | -1.32639400 |
| C | 0.08257500  | 1.71055800  | -0.16010400 |
| O | -0.00379000 | 1.02788900  | 0.90437500  |
| O | -1.90897900 | -1.02106600 | 1.05107200  |
| C | -2.47790900 | -1.03575100 | -0.08869700 |
| O | -1.90521600 | -1.05005400 | -1.20450200 |
| O | 1.89792700  | -1.26644200 | -1.19422600 |
| C | 2.49056800  | -1.16378100 | -0.09260700 |
| O | 1.93829900  | -1.00472900 | 1.04457500  |
| C | 3.98147000  | -1.22556500 | -0.08170700 |
| C | 4.69005900  | -1.20961600 | -1.28570600 |
| C | 4.66867100  | -1.27283600 | 1.13304300  |
| C | 6.09265400  | -1.23135500 | -1.27385500 |
| C | 6.06953600  | -1.31285500 | 1.14882700  |
| C | 6.78461700  | -1.28790200 | -0.05559400 |
| H | 4.14317900  | -1.16846900 | -2.22857100 |
| H | 4.10806700  | -1.27314800 | 2.06807700  |
| H | 7.87501800  | -1.30750100 | -0.04649400 |
| C | -3.97069700 | -1.03972500 | -0.06570500 |
| C | -4.65176500 | -1.07379900 | 1.15283300  |
| C | -4.68506500 | -0.98678800 | -1.26498400 |
| C | -6.05322400 | -1.05716300 | 1.17661300  |
| C | -6.08743600 | -0.96234300 | -1.24543300 |
| C | -6.77385300 | -0.99971700 | -0.02341700 |
| H | -4.08605700 | -1.10545000 | 2.08430000  |
| H | -4.14194100 | -0.95536600 | -2.21034700 |
| H | -7.86417600 | -0.97953500 | -0.00772900 |
| C | 0.10864200  | 3.20042900  | -0.00121600 |
| C | 0.11305600  | 3.79073800  | 1.26375900  |
| C | 0.12864800  | 4.00089000  | -1.14384500 |
| C | 0.14156300  | 5.18872000  | 1.38601300  |
| C | 0.14927600  | 5.39707400  | -1.02733300 |
| C | 0.15772800  | 5.99469200  | 0.23936100  |
| H | 0.09600300  | 3.15670600  | 2.15104500  |
| H | 0.12633200  | 3.52472900  | -2.12493000 |
| H | 0.17677600  | 7.08100300  | 0.33413400  |
| C | 0.16033400  | 6.20051100  | -2.20803500 |
| C | -6.82706500 | -0.88894500 | -2.46719900 |
| C | 0.15537700  | 5.80563500  | 2.67561200  |
| C | -6.73891400 | -1.08928500 | 2.43020300  |
| C | 6.75896600  | -1.37044700 | 2.39935300  |
| C | 6.82908400  | -1.18424500 | -2.49893800 |
| N | 0.16645900  | 6.83480400  | -3.18415800 |
| N | 0.16931600  | 6.32316600  | 3.71891500  |
| N | -7.43935200 | -0.82283000 | -3.45571100 |
| N | -7.28102700 | -1.11482800 | 3.46036900  |
| N | 7.30155000  | -1.41948900 | 3.42840000  |
| N | 7.44148000  | -1.13668000 | -3.48845400 |
| C | -0.29425500 | -4.03292000 | -0.57332800 |
| C | 0.55006700  | -3.84410500 | 0.67764900  |

|    |             |             |             |
|----|-------------|-------------|-------------|
| H  | -0.24364500 | -3.09827600 | -1.16946500 |
| H  | 0.18122200  | -4.79833300 | -1.20568500 |
| C  | -1.73982600 | -4.40120200 | -0.31506400 |
| C  | 0.06584300  | -2.85645100 | 1.68025700  |
| H  | 0.58302700  | -4.81239200 | 1.22346700  |
| H  | 1.60138900  | -3.65177300 | 0.41067500  |
| H  | -1.82428200 | -5.36760300 | 0.20421100  |
| H  | -2.25819800 | -3.65848900 | 0.30939500  |
| H  | -2.30765300 | -4.48374200 | -1.25134500 |
| H  | -0.97330100 | -2.98587000 | 2.00800400  |
| H  | 0.74795300  | -2.69594700 | 2.52749200  |
| Cu | 0.01549800  | -0.95150400 | 1.12008500  |
| Cu | 0.01823500  | -0.77922500 | -1.45027400 |

#### INT6

0 1

|   |             |             |             |
|---|-------------|-------------|-------------|
| O | -0.25412400 | 0.91763700  | -1.14517900 |
| C | -0.31043300 | 1.65827300  | -0.11956100 |
| O | -0.27564100 | 1.27375400  | 1.07380200  |
| O | -1.97631300 | -1.26675900 | 1.41848600  |
| C | -2.53661100 | -1.33236300 | 0.29519600  |
| O | -1.95686100 | -1.27188100 | -0.83596600 |
| O | 1.87412500  | -0.80104000 | -0.72128300 |
| C | 2.40192300  | -0.83877100 | 0.43661400  |
| O | 1.78705100  | -0.94604200 | 1.52675200  |
| C | 3.88970300  | -0.74792300 | 0.48524200  |
| C | 4.65055300  | -0.87339900 | -0.67974500 |
| C | 4.51973700  | -0.52648500 | 1.71200300  |
| C | 6.04999600  | -0.79693800 | -0.61517500 |
| C | 5.91564000  | -0.41845000 | 1.77641800  |
| C | 6.68393400  | -0.56182200 | 0.61291200  |
| H | 4.15123600  | -1.03472400 | -1.63626700 |
| H | 3.91452900  | -0.42873800 | 2.61388100  |
| H | 7.77093700  | -0.48781800 | 0.66168500  |
| C | -4.02202200 | -1.48130900 | 0.27204500  |
| C | -4.73769400 | -1.39969500 | 1.46928900  |
| C | -4.69793600 | -1.67224900 | -0.93503200 |
| C | -6.13615800 | -1.50151900 | 1.46168400  |
| C | -6.09548400 | -1.79097100 | -0.94580700 |
| C | -6.81688100 | -1.70192000 | 0.25264400  |
| H | -4.19839000 | -1.24632900 | 2.40464800  |
| H | -4.13265200 | -1.72426800 | -1.86610900 |
| H | -7.90438500 | -1.78420700 | 0.24386600  |
| C | -0.42770500 | 3.13315600  | -0.35831300 |
| C | -0.54513800 | 3.98705900  | 0.73879500  |
| C | -0.41452500 | 3.65750400  | -1.65200000 |
| C | -0.65285400 | 5.37106800  | 0.54828300  |
| C | -0.51532600 | 5.04370000  | -1.84809900 |
| C | -0.63665800 | 5.90299000  | -0.74737600 |
| H | -0.55165200 | 3.56191600  | 1.74295400  |
| H | -0.32234200 | 2.98159900  | -2.50318200 |
| H | -0.71695700 | 6.97987600  | -0.90003500 |
| C | -0.49139800 | 5.59385500  | -3.16729800 |
| C | -0.77696600 | 6.23007700  | 1.68278700  |
| C | -6.78633800 | -1.99693600 | -2.18075800 |
| C | -6.87007600 | -1.39023800 | 2.68456000  |
| C | 6.55001800  | -0.15294800 | 3.02983900  |
| C | 6.83710600  | -0.95676500 | -1.79867700 |
| C | 1.43695100  | -3.66559500 | -0.79281300 |
| C | 0.09733700  | -3.02177900 | -0.68606500 |

|    |             |             |             |
|----|-------------|-------------|-------------|
| H  | -0.57751300 | -3.22099400 | -1.53318100 |
| H  | -0.42266200 | -3.18905500 | 0.26693500  |
| H  | 2.11052100  | -3.33507300 | 0.01710500  |
| H  | 1.26368000  | -4.73617300 | -0.54864300 |
| C  | 2.11859600  | -3.57577700 | -2.14876600 |
| H  | 2.22850300  | -2.51580500 | -2.43054900 |
| H  | 1.45288700  | -4.01243600 | -2.91288400 |
| C  | 3.46698600  | -4.26448400 | -2.18143800 |
| H  | 4.15951000  | -3.83394000 | -1.44162000 |
| H  | 3.38257200  | -5.33681300 | -1.95156600 |
| H  | 3.94721800  | -4.17951200 | -3.16493200 |
| N  | -0.46949000 | 6.05652900  | -4.23587700 |
| N  | -0.87781700 | 6.91101500  | 2.62169200  |
| N  | -7.34582400 | -2.16736600 | -3.18787900 |
| N  | -7.46696200 | -1.29057700 | 3.67985200  |
| N  | 7.05403500  | 0.07497100  | 4.05453900  |
| N  | 7.48640900  | -1.09262200 | -2.75613900 |
| Cu | -0.02902600 | -1.03810800 | -0.88676300 |
| Cu | -0.13280300 | -0.70680900 | 1.63032700  |

TS6-7

0 1

|   |             |             |             |
|---|-------------|-------------|-------------|
| O | -0.25979900 | 0.97245100  | -1.01896000 |
| C | -0.27836000 | 1.66166600  | 0.04022900  |
| O | -0.26447100 | 1.19496400  | 1.21142200  |
| O | -1.90940000 | -1.18366600 | 1.17485700  |
| C | -2.55553700 | -1.30400500 | 0.07965400  |
| O | -2.06389500 | -1.36874200 | -1.06485200 |
| O | 2.03382900  | -0.83839600 | -1.10068600 |
| C | 2.50978200  | -0.78544000 | 0.05114300  |
| O | 1.85022900  | -0.74984000 | 1.14381100  |
| C | 3.99203900  | -0.79676200 | 0.18665000  |
| C | 4.75175000  | -0.90161400 | -0.97503400 |
| C | 4.61654900  | -0.72511000 | 1.43095500  |
| C | 6.14628700  | -0.94622400 | -0.89832900 |
| C | 6.01580000  | -0.75863500 | 1.50394300  |
| C | 6.78695100  | -0.87186700 | 0.34111400  |
| H | 4.24698600  | -0.95219400 | -1.94000300 |
| H | 4.01429900  | -0.64183900 | 2.33647100  |
| H | 7.87500600  | -0.90399800 | 0.40470500  |
| C | -4.03788800 | -1.36150000 | 0.20274000  |
| C | -4.67464700 | -1.32347100 | 1.44238700  |
| C | -4.78629300 | -1.42970000 | -0.96885400 |
| C | -6.07455600 | -1.35662900 | 1.50113700  |
| C | -6.18212500 | -1.45832100 | -0.90781700 |
| C | -6.83459600 | -1.42363800 | 0.32735200  |
| H | -4.08135900 | -1.26183100 | 2.35540600  |
| H | -4.27197000 | -1.45051200 | -1.92960300 |
| H | -7.92359700 | -1.44343900 | 0.37873000  |
| C | -0.30637000 | 3.15269900  | -0.09059500 |
| C | -0.33586600 | 3.92456800  | 1.07057100  |
| C | -0.28134900 | 3.77386000  | -1.34095400 |
| C | -0.33916700 | 5.32264300  | 0.98991800  |
| C | -0.28213100 | 5.17563100  | -1.42785700 |
| C | -0.31200200 | 5.95216100  | -0.26046700 |
| H | -0.35118500 | 3.42495200  | 2.03972700  |
| H | -0.25543300 | 3.16084300  | -2.24316200 |
| H | -0.31057200 | 7.04069900  | -0.32811300 |
| C | -0.24327200 | 5.83711000  | -2.69585100 |
| C | -0.36058600 | 6.08488000  | 2.19666900  |



|    |             |             |             |
|----|-------------|-------------|-------------|
| C  | -6.90998800 | -1.51110500 | -2.12726500 |
| C  | -6.74934800 | -1.31401500 | 2.75384800  |
| C  | 6.67910600  | -0.68551300 | 2.76098100  |
| C  | 6.88315500  | -1.08294300 | -2.10537300 |
| C  | 0.30546900  | -3.55178900 | -0.97360400 |
| C  | 0.17405000  | -2.93107700 | -2.20546500 |
| H  | 1.06227500  | -2.79209200 | -2.83250600 |
| H  | -0.80274600 | -2.89612800 | -2.69772200 |
| H  | 0.09961100  | -2.13343100 | 0.22983800  |
| H  | -0.61084200 | -3.91169200 | -0.48634200 |
| C  | 1.60025700  | -4.08282300 | -0.45234200 |
| H  | 2.43286900  | -3.48548900 | -0.85886900 |
| H  | 1.72172700  | -5.07736700 | -0.92234600 |
| C  | 1.69893200  | -4.23112800 | 1.05194000  |
| H  | 1.68948900  | -3.25654700 | 1.56051400  |
| H  | 0.86345700  | -4.82194800 | 1.45419400  |
| H  | 2.62649900  | -4.74135000 | 1.34070900  |
| N  | -0.20657700 | 6.40591100  | -3.71195300 |
| N  | -0.37369700 | 6.66820500  | 3.20371100  |
| N  | -7.44776100 | -1.54840000 | -3.15618200 |
| N  | -7.32676700 | -1.27822500 | 3.76202200  |
| N  | 7.24872800  | -0.63069100 | 3.77257300  |
| N  | 7.42573600  | -1.20979100 | -3.12444500 |
| Cu | -0.02023300 | -1.02163200 | -1.40163600 |
| Cu | -0.05047000 | -0.81393100 | 1.09629200  |

#### INT7

0 1

|   |             |             |             |
|---|-------------|-------------|-------------|
| O | 0.06076100  | 0.75491300  | 0.87491900  |
| C | 0.10393300  | 1.64594800  | -0.00786800 |
| O | 0.11921800  | 1.44393500  | -1.26058600 |
| O | 1.95719300  | -0.78835400 | -1.57573600 |
| C | 2.52722900  | -1.23015100 | -0.53893900 |
| O | 1.96645900  | -1.60837300 | 0.52472000  |
| O | -1.96970700 | -1.47365800 | 0.48349800  |
| C | -2.48124000 | -1.05881800 | -0.59100300 |
| O | -1.86121200 | -0.65151900 | -1.61298400 |
| C | -3.96931100 | -1.02655800 | -0.67110900 |
| C | -4.72456500 | -1.32922900 | 0.46034600  |
| C | -4.60197900 | -0.67510900 | -1.86503500 |
| C | -6.12248300 | -1.27239700 | 0.40279900  |
| C | -6.00142700 | -0.63398100 | -1.92759900 |
| C | -6.76588000 | -0.92883800 | -0.79164600 |
| H | -4.21940900 | -1.59806300 | 1.38842700  |
| H | -4.00115400 | -0.43293700 | -2.74200700 |
| H | -7.85464500 | -0.88714100 | -0.83680000 |
| C | 4.01617400  | -1.28451800 | -0.58485800 |
| C | 4.69413400  | -1.01723600 | -1.77597000 |
| C | 4.72787500  | -1.57637800 | 0.57711200  |
| C | 6.09493900  | -1.05245700 | -1.80492000 |
| C | 6.12780300  | -1.59118200 | 0.55353600  |
| C | 6.81610100  | -1.33495500 | -0.63779000 |
| H | 4.12771000  | -0.78081500 | -2.67705800 |
| H | 4.18792800  | -1.77840000 | 1.50236100  |
| H | 7.90633500  | -1.35032700 | -0.65662700 |
| C | 0.14229000  | 3.08505000  | 0.41568200  |
| C | 0.20691800  | 4.06462300  | -0.57362200 |
| C | 0.11310800  | 3.45798100  | 1.76202400  |
| C | 0.24362800  | 5.42034400  | -0.22802400 |
| C | 0.14816000  | 4.81819500  | 2.11568300  |

|    |             |             |             |
|----|-------------|-------------|-------------|
| C  | 0.21392600  | 5.80204900  | 1.11770800  |
| H  | 0.22843600  | 3.75950200  | -1.61996300 |
| H  | 0.06248400  | 2.68360800  | 2.52937900  |
| H  | 0.24138900  | 6.85723600  | 1.39210700  |
| C  | 0.11800400  | 5.24376000  | 3.48274600  |
| C  | 0.31052800  | 6.38205500  | -1.27893200 |
| C  | 6.84115100  | -1.85472600 | 1.75860100  |
| C  | 6.79698700  | -0.79443600 | -3.02082800 |
| C  | -6.65670400 | -0.28680700 | -3.14707000 |
| C  | -6.88066800 | -1.55533400 | 1.57561300  |
| C  | -0.00823500 | -2.77904600 | 2.73756000  |
| C  | -0.04689000 | -1.45676600 | 3.02626800  |
| H  | -0.99167900 | -0.94678600 | 3.23849400  |
| H  | 0.86655200  | -0.87011500 | 3.14721800  |
| H  | 0.00034100  | -1.95534500 | -0.85382100 |
| H  | 0.97619500  | -3.24553500 | 2.58768800  |
| C  | -1.18274300 | -3.69999000 | 2.69613000  |
| H  | -2.11453700 | -3.11550500 | 2.74648700  |
| H  | -1.15628500 | -4.29837400 | 3.62464100  |
| C  | -1.18892900 | -4.63311300 | 1.49902000  |
| H  | -1.27359200 | -4.07489400 | 0.55473700  |
| H  | -0.26764800 | -5.23124500 | 1.44748800  |
| H  | -2.03241300 | -5.33387200 | 1.54050500  |
| N  | 0.09533300  | 5.64631500  | 4.57645100  |
| N  | 0.36469900  | 7.11095900  | -2.18412500 |
| N  | 7.39745900  | -2.06018900 | 2.75890600  |
| N  | 7.37873400  | -0.58849600 | -4.00740400 |
| N  | -7.19898200 | -0.00747100 | -4.13796900 |
| N  | -7.47582200 | -1.78085600 | 2.54888400  |
| Cu | -0.00161400 | -1.47498200 | 0.78627900  |
| Cu | 0.05441900  | -0.53006100 | -1.51320300 |

## H-Ru-DHKUST-1

INT1

0 5

|    |             |             |             |
|----|-------------|-------------|-------------|
| O  | 0.10297800  | 0.92639800  | -1.18336400 |
| C  | 0.08931600  | 1.49911100  | -0.05542100 |
| O  | 0.11484000  | 0.90019300  | 1.05574600  |
| O  | -1.98124000 | -1.19293000 | 1.07647000  |
| C  | -2.58952600 | -1.23856500 | -0.03328900 |
| O  | -2.00130100 | -1.29742800 | -1.15926800 |
| O  | 2.04768200  | -1.51788900 | -1.15633800 |
| C  | 2.63912400  | -1.48705400 | -0.03088500 |
| O  | 2.03361900  | -1.42029400 | 1.07971000  |
| C  | 4.10149800  | -1.48161300 | -0.00948200 |
| C  | 4.81093100  | -1.43415000 | -1.20516300 |
| C  | 4.76564400  | -1.44224400 | 1.21337600  |
| C  | 6.20277900  | -1.33182100 | -1.16905400 |
| C  | 6.15741100  | -1.34446900 | 1.23467000  |
| C  | 6.88854300  | -1.29066500 | 0.04645400  |
| H  | 4.27900100  | -1.44657700 | -2.15644100 |
| H  | 4.19653900  | -1.46190800 | 2.14254000  |
| H  | 7.97407300  | -1.19371100 | 0.06690000  |
| C  | -4.05151300 | -1.25663300 | -0.00948300 |
| C  | -4.71425100 | -1.29687100 | 1.21400600  |
| C  | -4.76224600 | -1.29232200 | -1.20452900 |
| C  | -6.10663000 | -1.38519400 | 1.23578400  |
| C  | -6.15506800 | -1.37522000 | -1.16741200 |
| C  | -6.83973800 | -1.42096400 | 0.04825700  |
| H  | -4.14412000 | -1.28211600 | 2.14265600  |
| H  | -4.23153100 | -1.27302300 | -2.15632700 |
| H  | -7.92659500 | -1.50135600 | 0.06937900  |
| C  | 0.01773500  | 2.99194800  | -0.03141700 |
| C  | -0.02793400 | 3.65525100  | 1.19566100  |
| C  | -0.03138800 | 3.72201000  | -1.22125400 |
| C  | -0.12693400 | 5.05254300  | 1.23919300  |
| C  | -0.12932500 | 5.12160700  | -1.18381200 |
| C  | -0.17736100 | 5.78894300  | 0.04842600  |
| H  | 0.00750800  | 3.07269100  | 2.11694600  |
| H  | 0.00134900  | 3.19285200  | -2.17470100 |
| H  | -0.25751900 | 6.87620800  | 0.07885400  |
| C  | -0.19164300 | 5.88089000  | -2.39469200 |
| C  | -6.86634800 | -1.46032300 | -2.38694000 |
| C  | -0.18766700 | 5.71454400  | 2.50389200  |
| C  | -6.76438300 | -1.49137000 | 2.48437600  |
| C  | 6.81240800  | -1.23580600 | 2.48487900  |
| C  | 6.91000800  | -1.19989400 | -2.38736800 |
| N  | -0.24879700 | 6.51406700  | -3.37086800 |
| N  | -0.24243200 | 6.23179800  | 3.54553900  |
| N  | -7.41802600 | -1.55853500 | -3.40138500 |
| N  | -7.26860300 | -1.61249200 | 3.52111200  |
| N  | 7.30865300  | -1.10884000 | 3.52489500  |
| N  | 7.45762500  | -1.04753300 | -3.39753600 |
| H  | -0.06731500 | -2.90786900 | 1.11566600  |
| Ru | 0.02841400  | -1.31692800 | -1.17547900 |
| Ru | 0.02786800  | -1.29577300 | 1.06970600  |

INT2

0 5

|   |             |            |             |
|---|-------------|------------|-------------|
| O | -0.00664900 | 0.81201100 | -1.07312300 |
| C | -0.00715100 | 1.40286500 | 0.03774000  |

|    |             |             |             |
|----|-------------|-------------|-------------|
| O  | -0.00156600 | 0.82465100  | 1.16548400  |
| O  | -2.02650900 | -1.51338600 | 1.25130600  |
| C  | -2.62435800 | -1.43271500 | 0.13103700  |
| O  | -2.03827300 | -1.41537600 | -0.98905400 |
| O  | 2.04987800  | -1.39792000 | -0.98827400 |
| C  | 2.63698300  | -1.41236500 | 0.13140000  |
| O  | 2.04057600  | -1.49644000 | 1.25211500  |
| C  | 4.10104000  | -1.28262500 | 0.15796600  |
| C  | 4.80867900  | -1.08674400 | -1.02533600 |
| C  | 4.76321800  | -1.28978300 | 1.38405100  |
| C  | 6.19084900  | -0.88589000 | -0.97461300 |
| C  | 6.14587000  | -1.09384400 | 1.42518100  |
| C  | 6.86983900  | -0.89119900 | 0.24741900  |
| H  | 4.27985200  | -1.06849200 | -1.97844500 |
| H  | 4.19599000  | -1.42976200 | 2.30403400  |
| H  | 7.94650800  | -0.72336400 | 0.28129500  |
| C  | -4.08887000 | -1.30862500 | 0.16009800  |
| C  | -4.74758400 | -1.32330600 | 1.38789000  |
| C  | -4.80012600 | -1.10705800 | -1.02016400 |
| C  | -6.13017400 | -1.12900700 | 1.43436100  |
| C  | -6.18236400 | -0.90735500 | -0.96402000 |
| C  | -6.85780400 | -0.92032200 | 0.26002700  |
| H  | -4.17743500 | -1.46688800 | 2.30547600  |
| H  | -4.27410800 | -1.08221300 | -1.97469600 |
| H  | -7.93438700 | -0.75280700 | 0.29797500  |
| C  | -0.01495900 | 2.90126100  | 0.03508900  |
| C  | -0.00416000 | 3.59743000  | 1.24549300  |
| C  | -0.03305900 | 3.60551500  | -1.17199300 |
| C  | -0.01063600 | 5.00019600  | 1.25493600  |
| C  | -0.04115900 | 5.00943800  | -1.17131400 |
| C  | -0.02954600 | 5.70800000  | 0.04510400  |
| H  | 0.00964100  | 3.03701300  | 2.18121400  |
| H  | -0.04109200 | 3.05061300  | -2.11123400 |
| H  | -0.03521900 | 6.79869200  | 0.04907900  |
| C  | -0.06138900 | 5.73948600  | -2.40368000 |
| C  | 0.00224100  | 5.70390700  | 2.50073200  |
| C  | -6.89689300 | -0.64201000 | -2.16060200 |
| C  | -6.77757800 | -1.10350200 | 2.69712500  |
| C  | 6.79944000  | -1.06254700 | 2.68474100  |
| C  | 6.90036500  | -0.62988800 | -2.17610500 |
| N  | -0.07834700 | 6.34551900  | -3.39923800 |
| N  | 0.01336000  | 6.26539100  | 3.52148300  |
| N  | -7.46505100 | -0.39622000 | -3.14225200 |
| N  | -7.27095000 | -1.06438600 | 3.74704600  |
| N  | 7.30146300  | -1.01942500 | 3.73042800  |
| N  | 7.46190700  | -0.39364000 | -3.16384800 |
| C  | 0.01080800  | -2.46442200 | -3.08844700 |
| C  | 0.00525600  | -1.10726100 | -3.29488800 |
| H  | 0.93040100  | -0.55134700 | -3.46555500 |
| H  | -0.92436600 | -0.55897900 | -3.46589300 |
| H  | 0.01338300  | -3.00793300 | -0.74979300 |
| H  | -0.91266500 | -3.04693700 | -3.11690100 |
| H  | 0.93904800  | -3.03931800 | -3.11660700 |
| Ru | 0.00649000  | -1.40377000 | 1.29738400  |
| Ru | 0.00595200  | -1.42243600 | -1.02598100 |

TS2-3

0 5

|   |             |            |             |
|---|-------------|------------|-------------|
| O | -0.00719600 | 0.79441100 | -1.07262300 |
| C | -0.00759200 | 1.41478500 | 0.02586000  |

|    |             |             |             |
|----|-------------|-------------|-------------|
| O  | -0.00230900 | 0.86030300  | 1.16291000  |
| O  | -2.03112000 | -1.48000600 | 1.25084900  |
| C  | -2.62372100 | -1.38658100 | 0.12786300  |
| O  | -2.04711100 | -1.36094800 | -0.99530400 |
| O  | 2.05738400  | -1.34139700 | -0.99439400 |
| C  | 2.63515800  | -1.36398200 | 0.12829900  |
| O  | 2.04424500  | -1.46089300 | 1.25180700  |
| C  | 4.10017600  | -1.23705100 | 0.15669200  |
| C  | 4.80874400  | -1.05633800 | -1.02781400 |
| C  | 4.76121500  | -1.23833300 | 1.38280000  |
| C  | 6.19232200  | -0.86888200 | -0.97826500 |
| C  | 6.14504500  | -1.05164100 | 1.42191400  |
| C  | 6.87143100  | -0.86729600 | 0.24319200  |
| H  | 4.27948500  | -1.04167700 | -1.98074400 |
| H  | 4.19253100  | -1.36686100 | 2.30352000  |
| H  | 7.94957600  | -0.70910500 | 0.27572200  |
| C  | -4.08914000 | -1.26502900 | 0.15885900  |
| C  | -4.74665100 | -1.27302800 | 1.38675500  |
| C  | -4.80119500 | -1.07796800 | -1.02265200 |
| C  | -6.13019900 | -1.08632100 | 1.43124800  |
| C  | -6.18459500 | -0.88995700 | -0.96766200 |
| C  | -6.86009500 | -0.89518100 | 0.25589100  |
| H  | -4.17511900 | -1.40543200 | 2.30512600  |
| H  | -4.27478200 | -1.05711300 | -1.97705800 |
| H  | -7.93792300 | -0.73572800 | 0.29251800  |
| C  | -0.01476500 | 2.91054100  | -0.01536500 |
| C  | -0.00367400 | 3.62739400  | 1.18309300  |
| C  | -0.03242400 | 3.59319500  | -1.23549500 |
| C  | -0.00939500 | 5.02969900  | 1.16932300  |
| C  | -0.03979300 | 4.99745500  | -1.25767200 |
| C  | -0.02786700 | 5.71631600  | -0.05264500 |
| H  | 0.00977400  | 3.08264300  | 2.12794200  |
| H  | -0.04072200 | 3.02327300  | -2.16582300 |
| H  | -0.03297600 | 6.80693200  | -0.06769700 |
| C  | -0.05962200 | 5.71177400  | -2.49998200 |
| C  | 0.00386000  | 5.75060900  | 2.40547100  |
| C  | -6.89936700 | -0.64778100 | -2.16759700 |
| C  | -6.77721400 | -1.05134700 | 2.69286200  |
| C  | 6.79847500  | -1.01274000 | 2.68020100  |
| C  | 6.90252100  | -0.63799500 | -2.18303500 |
| N  | -0.07625200 | 6.31128000  | -3.49969500 |
| N  | 0.01536600  | 6.32070600  | 3.42148400  |
| N  | -7.46492100 | -0.42441800 | -3.15557100 |
| N  | -7.27108000 | -1.00341700 | 3.74180100  |
| N  | 7.30134600  | -0.96291700 | 3.72479500  |
| N  | 7.46203700  | -0.42646300 | -3.17700100 |
| C  | 0.01411200  | -3.06752300 | -2.43346000 |
| C  | 0.00820600  | -1.83623300 | -3.14345700 |
| H  | 0.93278900  | -1.47213600 | -3.60060500 |
| H  | -0.91969800 | -1.48128500 | -3.60106600 |
| H  | 0.01340000  | -2.96126600 | -0.82674700 |
| H  | -0.89708000 | -3.67449000 | -2.41380600 |
| H  | 0.93122700  | -3.66549500 | -2.41346800 |
| Ru | 0.00593500  | -1.36685600 | 1.34022400  |
| Ru | 0.00518200  | -1.35543400 | -1.05990200 |

INT3

0 3

|   |            |            |             |
|---|------------|------------|-------------|
| O | 0.17782700 | 1.08338900 | -1.13045200 |
| C | 0.24576200 | 1.60632700 | 0.04783200  |

|    |             |             |             |
|----|-------------|-------------|-------------|
| O  | 0.33272800  | 0.94924100  | 1.09969400  |
| O  | -1.99432100 | -0.94243400 | 0.97453900  |
| C  | -2.58501700 | -0.80827500 | -0.13315400 |
| O  | -1.99926500 | -0.73855700 | -1.25755000 |
| O  | 2.08677000  | -1.14856500 | -1.27364200 |
| C  | 2.65805800  | -1.39199300 | -0.16497800 |
| O  | 2.05164500  | -1.59475500 | 0.92304900  |
| C  | 4.12664700  | -1.39765600 | -0.13862700 |
| C  | 4.84275200  | -1.25308200 | -1.32250000 |
| C  | 4.78722200  | -1.46821400 | 1.08494800  |
| C  | 6.23686500  | -1.17832800 | -1.27574300 |
| C  | 6.18010800  | -1.37278600 | 1.12175200  |
| C  | 6.91674300  | -1.23516200 | -0.05703600 |
| H  | 4.31337200  | -1.18029300 | -2.27255500 |
| H  | 4.21220300  | -1.56536700 | 2.00575100  |
| H  | 8.00324100  | -1.15224300 | -0.02505900 |
| C  | -4.05345000 | -0.81913400 | -0.12193300 |
| C  | -4.72195500 | -0.97978900 | 1.08849400  |
| C  | -4.75732200 | -0.79970300 | -1.32168400 |
| C  | -6.10946400 | -1.13524500 | 1.09417600  |
| C  | -6.14485100 | -0.96252800 | -1.30468800 |
| C  | -6.83322500 | -1.12493300 | -0.10030400 |
| H  | -4.15502200 | -1.02097700 | 2.01860100  |
| H  | -4.22046700 | -0.69905500 | -2.26501400 |
| H  | -7.91296800 | -1.27480400 | -0.09578900 |
| C  | 0.17875500  | 3.09124000  | 0.10988300  |
| C  | 0.13281900  | 3.68726000  | 1.37120300  |
| C  | 0.11835200  | 3.88129200  | -1.04123200 |
| C  | 0.01555100  | 5.07735900  | 1.49010400  |
| C  | 0.01151800  | 5.27624800  | -0.92567100 |
| C  | -0.04219500 | 5.87586100  | 0.34094300  |
| H  | 0.17545400  | 3.05551000  | 2.25905900  |
| H  | 0.14772700  | 3.41007200  | -2.02451800 |
| H  | -0.13525600 | 6.95889500  | 0.42886500  |
| C  | -0.05940700 | 6.10474500  | -2.08959900 |
| C  | -6.83749400 | -1.05460500 | -2.53662900 |
| C  | -0.06547300 | 5.66028100  | 2.79129700  |
| C  | -6.75833800 | -1.39548600 | 2.32665100  |
| C  | 6.83481600  | -1.35346900 | 2.37868000  |
| C  | 6.95412400  | -0.99339400 | -2.48290100 |
| N  | -0.12424400 | 6.80131400  | -3.02092400 |
| N  | -0.14336900 | 6.10106800  | 3.86572100  |
| N  | -7.36741200 | -1.18692100 | -3.55968800 |
| N  | -7.24140200 | -1.66099400 | 3.34724400  |
| N  | 7.33977000  | -1.29551900 | 3.42149900  |
| N  | 7.51221000  | -0.81691900 | -3.48406200 |
| Ru | 0.04796100  | -0.89944900 | -1.25712200 |
| Ru | 0.02422900  | -1.30564200 | 0.94686600  |
| C  | -0.26036900 | -3.33630100 | 1.02778300  |
| H  | 0.60452800  | -3.85849800 | 0.58163400  |
| H  | -0.13762000 | -3.45664500 | 2.12744100  |
| C  | -1.57095200 | -3.92822400 | 0.56541000  |
| H  | -2.43316800 | -3.51235100 | 1.10570800  |
| H  | -1.74915500 | -3.75405100 | -0.50921800 |
| H  | -1.60465700 | -5.02077100 | 0.70783600  |

INT4

0 3

|   |            |            |             |
|---|------------|------------|-------------|
| O | 0.14530800 | 1.21494700 | -1.22511800 |
| C | 0.16034700 | 1.68316100 | -0.02728900 |

|    |             |             |             |
|----|-------------|-------------|-------------|
| O  | 0.18690500  | 1.00612100  | 1.02140300  |
| O  | -1.99325500 | -1.08055800 | 0.88465700  |
| C  | -2.57417900 | -0.84518300 | -0.21647000 |
| O  | -1.97981800 | -0.68322400 | -1.32798100 |
| O  | 2.04061700  | -0.97554400 | -1.36069300 |
| C  | 2.62596200  | -1.21324800 | -0.25729500 |
| O  | 2.03429900  | -1.42667200 | 0.84201700  |
| C  | 4.09269300  | -1.21377600 | -0.24418100 |
| C  | 4.80119200  | -1.06399200 | -1.43257100 |
| C  | 4.76244100  | -1.32459700 | 0.97159900  |
| C  | 6.19697900  | -1.03057800 | -1.39686300 |
| C  | 6.15726000  | -1.27348100 | 0.99599300  |
| C  | 6.88650300  | -1.13211400 | -0.18634300 |
| H  | 4.26637200  | -0.96683800 | -2.37745900 |
| H  | 4.19487000  | -1.43165700 | 1.89576800  |
| H  | 7.97561400  | -1.09103300 | -0.16483500 |
| C  | -4.04029100 | -0.82800400 | -0.20850400 |
| C  | -4.71372500 | -0.99415800 | 0.99867600  |
| C  | -4.74378200 | -0.74404000 | -1.40652300 |
| C  | -6.10638600 | -1.08489400 | 1.00347500  |
| C  | -6.13675800 | -0.84818800 | -1.38973800 |
| C  | -6.83028200 | -1.01198000 | -0.18822300 |
| H  | -4.14978000 | -1.07817900 | 1.92736500  |
| H  | -4.20551800 | -0.63218900 | -2.34791900 |
| H  | -7.91613800 | -1.10787400 | -0.18484200 |
| C  | 0.12225600  | 3.17098200  | 0.09417300  |
| C  | 0.09325600  | 3.73423400  | 1.37100900  |
| C  | 0.08910800  | 3.99500100  | -1.03342000 |
| C  | 0.02607300  | 5.12451700  | 1.52825800  |
| C  | 0.02481700  | 5.38899500  | -0.88084300 |
| C  | -0.00719600 | 5.95580200  | 0.40123300  |
| H  | 0.11642600  | 3.07731200  | 2.24123100  |
| H  | 0.10817200  | 3.54693500  | -2.02777000 |
| H  | -0.06177900 | 7.03866500  | 0.51896500  |
| C  | -0.01915800 | 6.24677700  | -2.02457400 |
| C  | -6.84216000 | -0.86364600 | -2.61770000 |
| C  | -0.01983100 | 5.68020700  | 2.84357600  |
| C  | -6.76369200 | -1.32283800 | 2.23538000  |
| C  | 6.82189800  | -1.33475200 | 2.24558900  |
| C  | 6.91488200  | -0.87062300 | -2.60681500 |
| N  | -0.06056700 | 6.96183800  | -2.94318300 |
| N  | -0.06322300 | 6.10692200  | 3.92590800  |
| N  | -7.39754300 | -0.92834300 | -3.63360700 |
| N  | -7.25242700 | -1.55930600 | 3.26010900  |
| N  | 7.33203000  | -1.36331800 | 3.28676600  |
| N  | 7.48530500  | -0.73129100 | -3.60667500 |
| C  | -0.08868200 | -2.91976400 | -0.42063600 |
| C  | -0.07477200 | -2.62462500 | 2.58925400  |
| H  | -0.02893000 | -2.61936700 | -1.57215100 |
| H  | 0.86086800  | -3.47644000 | -0.33561100 |
| C  | -1.26603200 | -3.86390100 | -0.35884800 |
| C  | 0.06489500  | -1.30731600 | 3.06345900  |
| H  | -1.05175600 | -3.11786500 | 2.61933300  |
| H  | 0.78199900  | -3.30631400 | 2.56950000  |
| H  | -1.30281100 | -4.35975300 | 0.62055100  |
| H  | -2.23406400 | -3.36614800 | -0.50681400 |
| H  | -1.20058100 | -4.65914900 | -1.11821100 |
| H  | -0.80108300 | -0.75768800 | 3.44442100  |
| H  | 1.03726700  | -0.93254000 | 3.39667500  |
| Ru | 0.03213000  | -0.80724900 | -1.40517700 |

Ru 0.01676900 -1.28797400 0.90593400

TS4-5

0 5

|   |             |             |             |
|---|-------------|-------------|-------------|
| O | 0.21749600  | 1.37806500  | -1.30459100 |
| C | 0.21097000  | 1.74521700  | -0.10001000 |
| O | 0.23133400  | 0.97172400  | 0.90193000  |
| O | -1.98912000 | -0.91399100 | 0.75256800  |
| C | -2.57112900 | -0.82054200 | -0.36601100 |
| O | -1.98340200 | -0.77308000 | -1.49065200 |
| O | 2.08196500  | -1.23566000 | -1.51266500 |
| C | 2.66001000  | -1.35066400 | -0.38582500 |
| O | 2.06924500  | -1.40734400 | 0.72932900  |
| C | 4.12926200  | -1.36114500 | -0.36681200 |
| C | 4.84061500  | -1.15019000 | -1.54447700 |
| C | 4.79567500  | -1.47665000 | 0.84971600  |
| C | 6.23235600  | -1.03656300 | -1.49370200 |
| C | 6.18692200  | -1.37166200 | 0.88730500  |
| C | 6.91797600  | -1.15244800 | -0.28206200 |
| H | 4.30630100  | -1.03781200 | -2.48799300 |
| H | 4.22579900  | -1.61521700 | 1.76815900  |
| H | 8.00214500  | -1.04442100 | -0.24707100 |
| C | -4.03962800 | -0.83057400 | -0.35996600 |
| C | -4.71918800 | -1.04438700 | 0.83603400  |
| C | -4.73734600 | -0.71716200 | -1.55859900 |
| C | -6.11013300 | -1.16199000 | 0.82650800  |
| C | -6.12971900 | -0.82672500 | -1.55419700 |
| C | -6.82849900 | -1.04806800 | -0.36547100 |
| H | -4.16081500 | -1.14793300 | 1.76656000  |
| H | -4.19246500 | -0.56886500 | -2.49101200 |
| H | -7.91332300 | -1.15474500 | -0.37208900 |
| C | 0.14665600  | 3.21125900  | 0.18050800  |
| C | 0.08761500  | 3.68094000  | 1.49402300  |
| C | 0.10273900  | 4.11251300  | -0.88506400 |
| C | -0.02119600 | 5.05656100  | 1.74474100  |
| C | -0.00523800 | 5.48879000  | -0.63972700 |
| C | -0.06728200 | 5.96372500  | 0.67722200  |
| H | 0.11731600  | 2.96793500  | 2.31883300  |
| H | 0.14338000  | 3.73076200  | -1.90604800 |
| H | -0.15710400 | 7.03331000  | 0.87069100  |
| C | -0.06930400 | 6.40690100  | -1.73340900 |
| C | -6.82626500 | -0.77584200 | -2.78577800 |
| C | -0.10288200 | 5.53537300  | 3.08912100  |
| C | -6.77412800 | -1.47175200 | 2.03839300  |
| C | 6.83226200  | -1.41750700 | 2.14740800  |
| C | 6.94492700  | -0.72100200 | -2.67680600 |
| N | -0.12996200 | 7.15046600  | -2.62756000 |
| N | -0.17891500 | 5.92303800  | 4.18465800  |
| N | -7.36964500 | -0.77112400 | -3.81003100 |
| N | -7.27362400 | -1.77465000 | 3.04024000  |
| N | 7.30690200  | -1.41909500 | 3.20567900  |
| N | 7.50922600  | -0.41122100 | -3.64163600 |
| C | -0.16743100 | -3.39530900 | 0.97818600  |
| C | -0.36612300 | -2.43381500 | 2.74444000  |
| H | -0.01891900 | -3.06753600 | -0.07888600 |
| H | 0.75967100  | -3.92157000 | 1.23555900  |
| C | -1.40051100 | -4.25280400 | 1.03755400  |
| C | 0.13765000  | -1.11637900 | 2.92540500  |
| H | -1.45084300 | -2.55510300 | 2.81904700  |
| H | 0.18322300  | -3.26902800 | 3.18900800  |



|    |             |             |             |
|----|-------------|-------------|-------------|
| H  | -1.53646500 | -4.72089000 | 2.02341200  |
| H  | -2.31120400 | -3.67502100 | 0.82157900  |
| H  | -1.35209400 | -5.06872300 | 0.30079500  |
| H  | -0.56292900 | -0.32144800 | 3.19611000  |
| H  | 1.16687100  | -0.97626900 | 3.26806200  |
| Ru | 0.07277800  | -0.82149800 | -1.58527500 |
| Ru | 0.03962300  | -1.13840300 | 0.78497000  |

#### INT5

0 5

|   |             |             |             |
|---|-------------|-------------|-------------|
| O | 0.24734900  | 1.34320700  | -1.21719900 |
| C | 0.23783300  | 1.76839000  | -0.04051800 |
| O | 0.24176800  | 1.02635200  | 1.00372300  |
| O | -1.98515200 | -0.74174900 | 0.74196700  |
| C | -2.57359000 | -0.74075500 | -0.37640700 |
| O | -2.00054500 | -0.76728000 | -1.51011300 |
| O | 2.08681200  | -1.24201500 | -1.50934800 |
| C | 2.65735900  | -1.27694400 | -0.37393900 |
| O | 2.06736200  | -1.23562800 | 0.74295200  |
| C | 4.12597700  | -1.31879800 | -0.34367300 |
| C | 4.84684100  | -1.14234700 | -1.52032500 |
| C | 4.78292700  | -1.43054700 | 0.87855300  |
| C | 6.23988900  | -1.05273800 | -1.46295700 |
| C | 6.17630000  | -1.36127100 | 0.92081600  |
| C | 6.91730100  | -1.17059100 | -0.24746200 |
| H | 4.31995200  | -1.03397700 | -2.46844400 |
| H | 4.20501300  | -1.54220600 | 1.79575200  |
| H | 8.00337400  | -1.08557300 | -0.20824000 |
| C | -4.04213800 | -0.76563600 | -0.35546200 |
| C | -4.71144800 | -0.96476700 | 0.84915600  |
| C | -4.74757000 | -0.67278500 | -1.55015000 |
| C | -6.10187700 | -1.09294700 | 0.84888800  |
| C | -6.13931100 | -0.78211900 | -1.53443900 |
| C | -6.82887900 | -0.99417700 | -0.33949000 |
| H | -4.14547000 | -1.04941700 | 1.77711600  |
| H | -4.20978500 | -0.53564000 | -2.48825800 |
| H | -7.91340700 | -1.10405000 | -0.33693900 |
| C | 0.18623500  | 3.23505500  | 0.20846300  |
| C | 0.12629100  | 3.72551400  | 1.51414300  |
| C | 0.14869200  | 4.11792000  | -0.87388300 |
| C | 0.02264900  | 5.10414000  | 1.74142800  |
| C | 0.04510900  | 5.49866400  | -0.64972800 |
| C | -0.01761000 | 5.99416400  | 0.66018500  |
| H | 0.14892400  | 3.02867800  | 2.35248600  |
| H | 0.18911800  | 3.72026800  | -1.88890700 |
| H | -0.10465800 | 7.06699000  | 0.83595200  |
| C | -0.01675300 | 6.41088100  | -1.74944800 |
| C | -6.83603000 | -0.73166200 | -2.76471600 |
| C | -0.06221100 | 5.58979000  | 3.08174200  |
| C | -6.76546900 | -1.39684400 | 2.06253200  |
| C | 6.81980900  | -1.41633700 | 2.18139100  |
| C | 6.95764700  | -0.75213200 | -2.64594500 |
| N | -0.07818900 | 7.16523100  | -2.63471500 |
| N | -0.14122500 | 5.96216500  | 4.18173200  |
| N | -7.36375900 | -0.71723700 | -3.79661600 |
| N | -7.28052700 | -1.69713500 | 3.05724200  |
| N | 7.30168700  | -1.42781800 | 3.23622500  |
| N | 7.51681800  | -0.44533800 | -3.61438900 |
| C | -0.25109200 | -3.61035600 | 1.23259600  |
| C | -0.78989400 | -2.98580600 | 2.51793000  |

|    |             |             |             |
|----|-------------|-------------|-------------|
| H  | -0.22916300 | -2.87272400 | 0.36305700  |
| H  | 0.80873000  | -3.88609700 | 1.36013600  |
| C  | -1.06510000 | -4.77477300 | 0.71360300  |
| C  | -0.08935000 | -1.67657100 | 2.76443200  |
| H  | -1.87434000 | -2.81997100 | 2.40393700  |
| H  | -0.68684000 | -3.71509100 | 3.34368700  |
| H  | -1.11518800 | -5.56565300 | 1.47596000  |
| H  | -2.09996400 | -4.47378100 | 0.49345400  |
| H  | -0.64068800 | -5.21737300 | -0.19662300 |
| H  | -0.64946000 | -0.95918400 | 3.38177900  |
| H  | 0.93788300  | -1.78697200 | 3.14659800  |
| Ru | 0.05798000  | -0.89170300 | -1.61935800 |
| Ru | .04648300   | -0.95175400 | 0.79552600  |

INT6

0 5

|   |             |             |             |
|---|-------------|-------------|-------------|
| O | -0.29338800 | 0.96644400  | 1.05828700  |
| C | -0.31966400 | 1.71853600  | 0.03316400  |
| O | -0.32492200 | 1.31053500  | -1.15550200 |
| O | 1.97272300  | -0.69770600 | -1.45329800 |
| C | 2.55874800  | -0.68609900 | -0.32531100 |
| O | 1.98852900  | -0.77309600 | 0.79828100  |
| O | -2.06988800 | -1.37377400 | 0.80732800  |
| C | -2.65488400 | -1.35907800 | -0.31190600 |
| O | -2.07973400 | -1.28419000 | -1.44380900 |
| C | -4.12499900 | -1.38205800 | -0.30696300 |
| C | -4.81369700 | -1.51522000 | 0.89505500  |
| C | -4.81446300 | -1.17246500 | -1.49764300 |
| C | -6.20779400 | -1.43605700 | 0.89999600  |
| C | -6.20760800 | -1.07434200 | -1.47778000 |
| C | -6.91662300 | -1.21377000 | -0.28307600 |
| H | -4.26129400 | -1.65407400 | 1.82441000  |
| H | -4.26166900 | -1.04917200 | -2.42878000 |
| H | -8.00301700 | -1.12466500 | -0.26935600 |
| C | 4.02693800  | -0.62161700 | -0.33360700 |
| C | 4.70048500  | -0.46999200 | -1.54182800 |
| C | 4.73303900  | -0.78882400 | 0.85392400  |
| C | 6.09659900  | -0.49019500 | -1.55739500 |
| C | 6.12857600  | -0.82523000 | 0.82325400  |
| C | 6.82275600  | -0.66924900 | -0.37843600 |
| H | 4.13509700  | -0.35473800 | -2.46643400 |
| H | 4.19413000  | -0.91525400 | 1.79323200  |
| H | 7.91202100  | -0.70702500 | -0.39826700 |
| C | -0.31539100 | 3.19073000  | 0.27445300  |
| C | -0.31357500 | 4.05452800  | -0.82268300 |
| C | -0.27031600 | 3.70791000  | 1.57145100  |
| C | -0.26127900 | 5.44161000  | -0.62830900 |
| C | -0.21930600 | 5.09589500  | 1.77133800  |
| C | -0.21490700 | 5.96482600  | 0.67078000  |
| H | -0.34275800 | 3.63513400  | -1.82908300 |
| H | -0.26557600 | 3.02489100  | 2.42195600  |
| H | -0.16934600 | 7.04339900  | 0.82604000  |
| C | -0.15473700 | 5.63530500  | 3.09457800  |
| C | -0.23816700 | 6.31579200  | -1.75928000 |
| C | 6.83319200  | -1.08957600 | 2.02255000  |
| C | 6.76788700  | -0.37735900 | -2.79888400 |
| C | -6.88764400 | -0.75359200 | -2.67840500 |
| C | -6.89477300 | -1.52265500 | 2.13546300  |
| N | -0.09362800 | 6.08505100  | 4.16735800  |
| N | -0.21048000 | 7.01494000  | -2.69022500 |

|    |             |             |             |
|----|-------------|-------------|-------------|
| N  | 7.37978600  | -1.35651300 | 3.00976400  |
| N  | 7.28580300  | -0.31128600 | -3.83418300 |
| N  | -7.40852400 | -0.43768100 | -3.66537200 |
| N  | -7.42741800 | -1.56535800 | 3.16471400  |
| C  | 1.68851800  | -3.85172200 | 1.63337400  |
| C  | 0.31835400  | -3.19303200 | 1.67120700  |
| H  | 1.74476000  | -4.53951300 | 2.49266500  |
| H  | 2.45353800  | -3.08259700 | 1.82397300  |
| C  | 1.98719400  | -4.58615800 | 0.34429800  |
| C  | 0.09509800  | -2.11749700 | 2.65587600  |
| H  | -0.50316800 | -3.92898500 | 1.63099500  |
| H  | 1.24489100  | -5.37156300 | 0.13888700  |
| H  | 1.98082700  | -3.90285900 | -0.52084300 |
| H  | 2.97255900  | -5.06904100 | 0.36717900  |
| H  | -0.84823900 | -2.12792800 | 3.21276000  |
| H  | 0.96190200  | -1.83149400 | 3.26469600  |
| H  | 0.18071800  | -2.79825000 | 0.53666800  |
| Ru | -0.04107400 | -1.06416400 | 0.86887000  |
| Ru | -0.07065500 | -0.89065600 | -1.55684500 |

TS6-7

0 5

|   |             |             |             |
|---|-------------|-------------|-------------|
| O | -0.29029100 | 0.95169100  | 1.07983600  |
| C | -0.30350300 | 1.71450400  | 0.07438900  |
| O | -0.30291600 | 1.32298900  | -1.12755000 |
| O | 1.96415900  | -0.69745800 | -1.50517200 |
| C | 2.55749300  | -0.73396600 | -0.38092900 |
| O | 1.98692200  | -0.86628000 | 0.73791300  |
| O | -2.06213300 | -1.45279400 | 0.73829200  |
| C | -2.65792900 | -1.37069500 | -0.37198000 |
| O | -2.08693600 | -1.22792900 | -1.50021800 |
| C | -4.12728000 | -1.38633600 | -0.35955500 |
| C | -4.81134300 | -1.54541500 | 0.84225500  |
| C | -4.82105900 | -1.13963000 | -1.54059600 |
| C | -6.20457200 | -1.45119400 | 0.85702200  |
| C | -6.21325800 | -1.03287400 | -1.51162300 |
| C | -6.91739400 | -1.19462600 | -0.31684900 |
| H | -4.25588100 | -1.71304600 | 1.76502100  |
| H | -4.27211400 | -0.99474600 | -2.47086500 |
| H | -8.00278000 | -1.09547900 | -0.29502000 |
| C | 4.02457400  | -0.66745400 | -0.39028700 |
| C | 4.69608100  | -0.48180100 | -1.59502100 |
| C | 4.73296100  | -0.86081900 | 0.79208500  |
| C | 6.09227800  | -0.49474900 | -1.61234000 |
| C | 6.12869300  | -0.88520200 | 0.76004100  |
| C | 6.82060800  | -0.69697000 | -0.43840200 |
| H | 4.12933800  | -0.34457900 | -2.51580300 |
| H | 4.19633600  | -1.01204200 | 1.72890800  |
| H | 7.91012600  | -0.72522600 | -0.45969100 |
| C | -0.29225600 | 3.18815900  | 0.32074400  |
| C | -0.28924700 | 4.06870500  | -0.76300400 |
| C | -0.24556500 | 3.68639000  | 1.62463000  |
| C | -0.23551600 | 5.45322600  | -0.54698300 |
| C | -0.19099500 | 5.07054500  | 1.84689600  |
| C | -0.18649100 | 5.95639300  | 0.76017600  |
| H | -0.32026100 | 3.66569300  | -1.77606900 |
| H | -0.24294600 | 2.98839700  | 2.46296200  |
| H | -0.13954400 | 7.03248400  | 0.93161300  |
| C | -0.12433200 | 5.58382700  | 3.18019000  |
| C | -0.21553700 | 6.34996100  | -1.66071800 |

|    |             |             |             |
|----|-------------|-------------|-------------|
| C  | 6.83712900  | -1.16156200 | 1.95454800  |
| C  | 6.76274400  | -0.34537600 | -2.85055700 |
| C  | -6.89457800 | -0.67922000 | -2.70224300 |
| C  | -6.88725100 | -1.55299700 | 2.09406600  |
| N  | -0.06173800 | 6.00484700  | 4.26445200  |
| N  | -0.19173800 | 7.07435500  | -2.57251000 |
| N  | 7.38855500  | -1.43176000 | 2.93824400  |
| N  | 7.28177200  | -0.24727800 | -3.88279300 |
| N  | -7.41242200 | -0.33744500 | -3.68213100 |
| N  | -7.41877300 | -1.60377300 | 3.12363600  |
| C  | 1.62908000  | -3.72264000 | 1.90497100  |
| C  | 0.27002500  | -3.06653300 | 1.93119600  |
| H  | 1.64442900  | -4.42462800 | 2.75678700  |
| H  | 2.39505900  | -2.96709800 | 2.13884400  |
| C  | 1.97624000  | -4.45637900 | 0.62784400  |
| C  | 0.01875400  | -1.94998600 | 2.78210700  |
| H  | -0.56710700 | -3.76506100 | 1.78593900  |
| H  | 1.21358600  | -5.20499600 | 0.36693500  |
| H  | 2.05729700  | -3.76608000 | -0.22679500 |
| H  | 2.93481100  | -4.98461900 | 0.711170500 |
| H  | -0.96655800 | -1.82580500 | 3.23958000  |
| H  | 0.85801200  | -1.51551800 | 3.33624600  |
| H  | 0.17439100  | -2.71607800 | 0.38045500  |
| Ru | -0.03647900 | -1.15935300 | 0.79759800  |
| Ru | -0.07914800 | -0.84650300 | -1.58033200 |

#### INT7

0 5

|   |             |             |             |
|---|-------------|-------------|-------------|
| O | -0.25059700 | 0.88495500  | 1.06636200  |
| C | -0.27262300 | 1.68819900  | 0.09812900  |
| O | -0.29070100 | 1.35473600  | -1.12390500 |
| O | 1.93673100  | -0.69056700 | -1.64278800 |
| C | 2.55131400  | -0.83112300 | -0.53940900 |
| O | 1.98447200  | -1.04603100 | 0.57044000  |
| O | -2.05448100 | -1.55380700 | 0.58527100  |
| C | -2.67091800 | -1.39118300 | -0.50648900 |
| O | -2.10509000 | -1.15683400 | -1.62090100 |
| C | -4.13768200 | -1.40712500 | -0.48002100 |
| C | -4.81046200 | -1.62989900 | 0.71812700  |
| C | -4.84203000 | -1.08925100 | -1.63776000 |
| C | -6.20235000 | -1.52187500 | 0.75418100  |
| C | -6.23280900 | -0.97582100 | -1.58813800 |
| C | -6.92561000 | -1.19652800 | -0.39604500 |
| H | -4.24749700 | -1.85416100 | 1.62413500  |
| H | -4.30181200 | -0.89346300 | -2.56380400 |
| H | -8.00952600 | -1.08773500 | -0.35616600 |
| C | 4.01618700  | -0.77196300 | -0.56127100 |
| C | 4.67597900  | -0.50545000 | -1.75755200 |
| C | 4.73599700  | -1.03020600 | 0.60157200  |
| C | 6.07195700  | -0.50009500 | -1.78510200 |
| C | 6.13145400  | -1.02570100 | 0.56059700  |
| C | 6.81170200  | -0.75801800 | -0.62926100 |
| H | 4.10077200  | -0.31523100 | -2.66357500 |
| H | 4.20888600  | -1.24747500 | 1.53056600  |
| H | 7.90137800  | -0.76257800 | -0.65787800 |
| C | -0.25347400 | 3.15359100  | 0.40512300  |
| C | -0.26031400 | 4.08598200  | -0.63424800 |
| C | -0.19650300 | 3.58987800  | 1.73025000  |
| C | -0.20701900 | 5.45899200  | -0.35153400 |
| C | -0.14205100 | 4.96135900  | 2.02016500  |

|    |             |             |             |
|----|-------------|-------------|-------------|
| C  | -0.14773100 | 5.89890700  | 0.97789700  |
| H  | -0.30045600 | 3.73282100  | -1.66550300 |
| H  | -0.18780200 | 2.85144500  | 2.53307200  |
| H  | -0.10183100 | 6.96562700  | 1.20055300  |
| C  | -0.06769100 | 5.40726400  | 3.37708300  |
| C  | -0.20049400 | 6.41065900  | -1.41908700 |
| C  | 6.85268800  | -1.33181600 | 1.73985100  |
| C  | 6.73374600  | -0.26087800 | -3.01391000 |
| C  | -6.92160300 | -0.54934400 | -2.75026600 |
| C  | -6.87119500 | -1.67103800 | 1.99407900  |
| N  | 0.00001400  | 5.77054000  | 4.48181700  |
| N  | -0.18894400 | 7.18260700  | -2.29130300 |
| N  | 7.41555800  | -1.60895400 | 2.71501700  |
| N  | 7.25030700  | -0.08291800 | -4.03663900 |
| N  | -7.44165900 | -0.14567100 | -3.70508400 |
| N  | -7.38992100 | -1.75239500 | 3.02825500  |
| C  | 1.61558100  | -3.20509000 | 2.81098800  |
| C  | 0.23176700  | -2.66182600 | 2.65931200  |
| H  | 1.63283900  | -3.69848200 | 3.80098700  |
| H  | 2.32773100  | -2.36941500 | 2.89851200  |
| C  | 2.06587300  | -4.20021000 | 1.76051300  |
| C  | -0.12747100 | -1.37869100 | 2.96009900  |
| H  | -0.56221800 | -3.39719500 | 2.47652100  |
| H  | 1.33617700  | -5.01309000 | 1.63416900  |
| H  | 2.19340400  | -3.72318700 | 0.77889000  |
| H  | 3.02400800  | -4.66037000 | 2.03625600  |
| H  | -1.17347700 | -1.08461900 | 3.06657200  |
| H  | 0.62068600  | -0.64226200 | 3.26832900  |
| H  | 0.14980700  | -2.81956400 | 0.11306900  |
| Ru | -0.03410800 | -1.29845000 | 0.60211500  |
| Ru | -0.10035800 | -0.80230800 | -1.64262000 |

## H-Rh-DHKUST-1

INT1

0 1

|    |             |             |             |
|----|-------------|-------------|-------------|
| O  | -0.11512000 | 0.84823600  | -1.22513000 |
| C  | -0.07650100 | 1.43299300  | -0.13600900 |
| O  | -0.05998600 | 0.86120600  | 1.02839400  |
| O  | -2.02973400 | -1.23612900 | 1.12492900  |
| C  | -2.60458700 | -1.37881400 | -0.00212300 |
| O  | -2.04363800 | -1.50014600 | -1.12347900 |
| O  | 2.02489600  | -1.27613000 | -1.13291000 |
| C  | 2.58305500  | -1.17177700 | -0.00804200 |
| O  | 2.00537800  | -1.07391600 | 1.12175100  |
| C  | 4.05430500  | -1.20071400 | 0.01973200  |
| C  | 4.76290700  | -1.27861700 | -1.17425500 |
| C  | 4.71922000  | -1.21703100 | 1.24165800  |
| C  | 6.15526100  | -1.37524500 | -1.13811600 |
| C  | 6.11090700  | -1.32954100 | 1.26470000  |
| C  | 6.84133100  | -1.40297400 | 0.07764400  |
| H  | 4.22834100  | -1.28128900 | -2.12410900 |
| H  | 4.15122900  | -1.16830000 | 2.17028600  |
| H  | 7.92693800  | -1.49933400 | 0.09910700  |
| C  | -4.07618900 | -1.38795600 | 0.02337300  |
| C  | -4.74291500 | -1.34096500 | 1.24356200  |
| C  | -4.78610100 | -1.40607900 | -1.17243100 |
| C  | -6.13880500 | -1.31450800 | 1.26351100  |
| C  | -6.18146100 | -1.36182300 | -1.13966500 |
| C  | -6.86985700 | -1.32180400 | 0.07458300  |
| H  | -4.17448000 | -1.31734300 | 2.17286800  |
| H  | -4.25106000 | -1.43589900 | -2.12161700 |
| H  | -7.95919100 | -1.28533300 | 0.09268100  |
| C  | -0.02885900 | 2.92169000  | -0.08407700 |
| C  | 0.00726100  | 3.59887600  | 1.13600200  |
| C  | 0.00230100  | 3.63511300  | -1.28475500 |
| C  | 0.07625200  | 4.99869100  | 1.15756800  |
| C  | 0.07428300  | 5.03529100  | -1.26621200 |
| C  | 0.11046400  | 5.71941800  | -0.04319900 |
| H  | -0.01398800 | 3.03683800  | 2.06990000  |
| H  | -0.02368500 | 3.09042400  | -2.22958600 |
| H  | 0.16833100  | 6.80836600  | -0.02686300 |
| C  | 0.12130800  | 5.77348200  | -2.48986900 |
| C  | -6.89748400 | -1.31929700 | -2.35969500 |
| C  | 0.12049700  | 5.68346500  | 2.41030200  |
| C  | -6.80271500 | -1.25430200 | 2.51258300  |
| C  | 6.76762800  | -1.42576500 | 2.51523600  |
| C  | 6.86489800  | -1.49334500 | -2.35651100 |
| N  | 0.16632100  | 6.38374500  | -3.48064000 |
| N  | 0.16012800  | 6.22543400  | 3.43970700  |
| N  | -7.46243300 | -1.25529100 | -3.36999000 |
| N  | -7.31247100 | -1.19397100 | 3.55231100  |
| N  | 7.26923700  | -1.54317400 | 3.55402700  |
| N  | 7.41758100  | -1.61459700 | -3.36821300 |
| H  | 0.08098200  | -2.96044600 | -1.05620100 |
| Rh | 0.00847600  | -1.41989000 | -1.20159900 |
| Rh | 0.01496300  | -1.08896400 | 1.17052600  |

INT2

0 1

|   |            |            |            |
|---|------------|------------|------------|
| O | 0.01563100 | 0.72845800 | 1.12206700 |
| C | 0.01096300 | 1.34735000 | 0.04617900 |

|    |             |             |             |
|----|-------------|-------------|-------------|
| O  | 0.00158400  | 0.81782600  | -1.12912000 |
| O  | 2.01976600  | -1.21446700 | -1.30140600 |
| C  | 2.59584700  | -1.33432900 | -0.17814300 |
| O  | 2.04965800  | -1.50395200 | 0.94915900  |
| O  | -2.05974300 | -1.47345800 | 0.94963100  |
| C  | -2.60673100 | -1.30672400 | -0.17780800 |
| O  | -2.03162800 | -1.19559400 | -1.30240000 |
| C  | -4.08141300 | -1.20886300 | -0.20210700 |
| C  | -4.79398700 | -1.09604400 | 0.98770700  |
| C  | -4.74348200 | -1.17831200 | -1.42703400 |
| C  | -6.18183200 | -0.93166400 | 0.94515700  |
| C  | -6.13343600 | -1.03954200 | -1.45988900 |
| C  | -6.86236900 | -0.91012200 | -0.27512000 |
| H  | -4.26509200 | -1.11237900 | 1.94077200  |
| H  | -4.17205100 | -1.25387100 | -2.35184100 |
| H  | -7.94462500 | -0.78141000 | -0.30178200 |
| C  | 4.07077000  | -1.24062400 | -0.20514500 |
| C  | 4.72910800  | -1.21481800 | -1.43210500 |
| C  | 4.78668700  | -1.12013600 | 0.98198000  |
| C  | 6.11844600  | -1.07255800 | -1.47025000 |
| C  | 6.17397500  | -0.95141000 | 0.93397500  |
| C  | 6.85071200  | -0.93473800 | -0.28859000 |
| H  | 4.15493000  | -1.29491600 | -2.35479600 |
| H  | 4.26083000  | -1.13144400 | 1.93682000  |
| H  | 7.93232500  | -0.80159400 | -0.31926800 |
| C  | 0.01616500  | 2.84171400  | 0.05817000  |
| C  | 0.00328100  | 3.56936100  | -1.13384000 |
| C  | 0.03356300  | 3.51043800  | 1.28563000  |
| C  | 0.00725100  | 4.97163700  | -1.10071000 |
| C  | 0.03853400  | 4.91308100  | 1.32494400  |
| C  | 0.02511400  | 5.64500400  | 0.12879600  |
| H  | -0.01019800 | 3.04218700  | -2.08825200 |
| H  | 0.04323400  | 2.92856000  | 2.20828000  |
| H  | 0.02847700  | 6.73536300  | 0.15492100  |
| C  | 0.05708500  | 5.60428300  | 2.57928800  |
| C  | -0.00727700 | 5.71299800  | -2.32395900 |
| C  | 6.89274800  | -0.74909900 | 2.13973300  |
| C  | 6.77069100  | -1.03895500 | -2.72998500 |
| C  | -6.79247300 | -1.00505200 | -2.71615700 |
| C  | -6.89639400 | -0.74389900 | 2.15562800  |
| N  | 0.07235800  | 6.17508900  | 3.59524600  |
| N  | -0.01962800 | 6.30896900  | -3.32464000 |
| N  | 7.46446400  | -0.54953100 | 3.12969100  |
| N  | 7.27055800  | -1.00446100 | -3.77697200 |
| N  | -7.30188600 | -0.97176400 | -3.75860900 |
| N  | -7.46249000 | -0.55963300 | 3.15172700  |
| C  | -0.01298100 | -2.68996200 | 2.91157500  |
| C  | -0.00312400 | -1.33679000 | 3.21631300  |
| H  | -0.92604500 | -0.80477100 | 3.46184600  |
| H  | 0.92749700  | -0.81799500 | 3.46104400  |
| H  | -0.01796400 | -3.03702800 | 0.67118100  |
| H  | 0.90802000  | -3.27743200 | 2.94271500  |
| H  | -0.94227900 | -3.26415600 | 2.94369700  |
| Rh | 0.00561300  | -1.13485400 | -1.38896600 |
| Rh | 0.00539700  | -1.53767200 | 1.05187100  |

TS2-3

0 3

|   |             |            |             |
|---|-------------|------------|-------------|
| O | -0.01012500 | 0.77790700 | -1.00887400 |
| C | -0.00775700 | 1.41848700 | 0.07498200  |

|    |             |             |             |
|----|-------------|-------------|-------------|
| O  | 0.00013900  | 0.91464500  | 1.23261000  |
| O  | -2.00601200 | -1.67952700 | 1.16509100  |
| C  | -2.59759400 | -1.47615900 | 0.06965400  |
| O  | -2.04325100 | -1.37494400 | -1.06611500 |
| O  | 2.05343600  | -1.35205000 | -1.06340600 |
| C  | 2.60994900  | -1.45271200 | 0.07145100  |
| O  | 2.02134400  | -1.66092900 | 1.16743200  |
| C  | 4.08212100  | -1.28809400 | 0.11175600  |
| C  | 4.79603600  | -1.07035400 | -1.06476900 |
| C  | 4.73893600  | -1.29536300 | 1.34195900  |
| C  | 6.17761100  | -0.85667400 | -1.00823600 |
| C  | 6.11937800  | -1.07259400 | 1.39579200  |
| C  | 6.84639300  | -0.85542200 | 0.22047400  |
| H  | 4.27156500  | -1.05319200 | -2.02032400 |
| H  | 4.16734800  | -1.45823000 | 2.25586600  |
| H  | 7.92109100  | -0.67594800 | 0.26221700  |
| C  | -4.07011900 | -1.31611200 | 0.11340200  |
| C  | -4.72288200 | -1.32986400 | 1.34561800  |
| C  | -4.78791600 | -1.09204700 | -1.05966600 |
| C  | -6.10295000 | -1.10714000 | 1.40545700  |
| C  | -6.16922600 | -0.87770400 | -0.99707200 |
| C  | -6.83387500 | -0.88311300 | 0.23395500  |
| H  | -4.14813000 | -1.49681200 | 2.25676800  |
| H  | -4.26663500 | -1.06916800 | -2.01686300 |
| H  | -7.90822000 | -0.70266200 | 0.28032700  |
| C  | -0.01513900 | 2.91572100  | 0.00177500  |
| C  | -0.00382400 | 3.64120100  | 1.19385600  |
| C  | -0.03334900 | 3.58974000  | -1.22286700 |
| C  | -0.01009100 | 5.04179000  | 1.17239000  |
| C  | -0.04087900 | 4.99483100  | -1.25172900 |
| C  | -0.02894100 | 5.72194400  | -0.05178500 |
| H  | 0.01005100  | 3.10349200  | 2.14219000  |
| H  | -0.04195500 | 3.01529700  | -2.15042900 |
| H  | -0.03440800 | 6.81237500  | -0.07442100 |
| C  | -0.06094300 | 5.71355300  | -2.49093200 |
| C  | 0.00289300  | 5.75307100  | 2.41177800  |
| C  | -6.89196500 | -0.62428000 | -2.19534700 |
| C  | -6.75500200 | -1.07693500 | 2.67021300  |
| C  | 6.77782500  | -1.03715800 | 2.65722300  |
| C  | 6.89530900  | -0.61323700 | -2.21150900 |
| N  | -0.07764000 | 6.33377700  | -3.47778500 |
| N  | 0.01418900  | 6.29318900  | 3.44327900  |
| N  | -7.46494000 | -0.40572400 | -3.18214500 |
| N  | -7.27077000 | -1.03453000 | 3.71085500  |
| N  | 7.30164700  | -0.99096600 | 3.69371600  |
| N  | 7.46201700  | -0.40460100 | -3.20402600 |
| C  | 0.01554000  | -2.90851100 | -2.58757700 |
| C  | 0.00752800  | -1.60188700 | -3.16937400 |
| H  | 0.93039600  | -1.19305700 | -3.59067300 |
| H  | -0.92006200 | -1.20479500 | -3.59151600 |
| H  | 0.01563400  | -2.95593400 | -1.06949400 |
| H  | -0.89660900 | -3.51275800 | -2.64815700 |
| H  | 0.93529600  | -3.50119700 | -2.64750000 |
| Rh | 0.00519000  | -1.23724300 | 1.52922600  |
| Rh | 0.00517700  | -1.37111500 | -1.10199100 |

INT3

0 3

|   |             |            |             |
|---|-------------|------------|-------------|
| O | -0.00845700 | 0.77809500 | -1.01528000 |
| C | -0.00665400 | 1.40805000 | 0.08531500  |



|    |             |             |             |
|----|-------------|-------------|-------------|
| O  | 0.00078100  | 0.89474400  | 1.23007700  |
| O  | -2.00761600 | -1.68558000 | 1.13946200  |
| C  | -2.59560400 | -1.44658900 | 0.05174200  |
| O  | -2.04180600 | -1.30208700 | -1.08148200 |
| O  | 2.05138600  | -1.28090800 | -1.07857600 |
| C  | 2.60761100  | -1.42405000 | 0.05371200  |
| O  | 2.02283300  | -1.66728000 | 1.14208900  |
| C  | 4.08081500  | -1.27028900 | 0.09320100  |
| C  | 4.79501600  | -1.04583200 | -1.08143700 |
| C  | 4.73871200  | -1.29657400 | 1.32217100  |
| C  | 6.17856000  | -0.84732100 | -1.02399600 |
| C  | 6.12047400  | -1.08417000 | 1.37662000  |
| C  | 6.84895300  | -0.86297300 | 0.20331300  |
| H  | 4.26952900  | -1.01300000 | -2.03599600 |
| H  | 4.16662100  | -1.46491500 | 2.23475500  |
| H  | 7.92520900  | -0.69346200 | 0.24567400  |
| C  | -4.06915000 | -1.29769900 | 0.09477700  |
| C  | -4.72292000 | -1.33067000 | 1.32570200  |
| C  | -4.78734600 | -1.06708600 | -1.07631700 |
| C  | -6.10436900 | -1.11866500 | 1.38617600  |
| C  | -6.17067100 | -0.86828000 | -1.01281100 |
| C  | -6.83687100 | -0.89078600 | 0.21675500  |
| H  | -4.14757400 | -1.50296100 | 2.23546800  |
| H  | -4.26509900 | -1.02839800 | -2.03245000 |
| H  | -7.91282300 | -0.72057100 | 0.26376800  |
| C  | -0.01434500 | 2.90402800  | 0.00829000  |
| C  | -0.00326100 | 3.62318800  | 1.20437700  |
| C  | -0.03269300 | 3.58386000  | -1.21351100 |
| C  | -0.00989600 | 5.02365900  | 1.19031700  |
| C  | -0.04062300 | 4.98926300  | -1.23445000 |
| C  | -0.02891000 | 5.70994000  | -0.03050500 |
| H  | 0.01069300  | 3.08005100  | 2.14965200  |
| H  | -0.04115900 | 3.01597900  | -2.14497500 |
| H  | -0.03469800 | 6.80046700  | -0.04755500 |
| C  | -0.06093100 | 5.71584900  | -2.46940100 |
| C  | 0.00285400  | 5.72762200  | 2.43406400  |
| C  | -6.89352100 | -0.61437600 | -2.20988400 |
| C  | -6.75616700 | -1.10207700 | 2.65042800  |
| C  | 6.77863600  | -1.06223800 | 2.63761600  |
| C  | 6.89632400  | -0.60328600 | -2.22609500 |
| N  | -0.07786000 | 6.34394100  | -3.45134200 |
| N  | 0.01396200  | 6.26053000  | 3.46933800  |
| N  | -7.46517500 | -0.39724300 | -3.19741600 |
| N  | -7.27101400 | -1.06868800 | 3.69156200  |
| N  | 7.30140300  | -1.02505100 | 3.67470800  |
| N  | 7.46178200  | -0.39601800 | -3.21927400 |
| C  | 0.01571900  | -3.06117100 | -2.47585800 |
| C  | 0.00832400  | -1.73300400 | -3.10445100 |
| H  | 0.92564200  | -1.39838200 | -3.60033400 |
| H  | -0.91228000 | -1.40903600 | -3.60131000 |
| H  | 0.01466400  | -3.03386400 | -1.26850200 |
| H  | -0.88875000 | -3.66604000 | -2.62381100 |
| H  | 0.92742300  | -3.65535800 | -2.62268900 |
| Rh | 0.00530700  | -1.26999700 | 1.56858400  |
| Rh | 0.00481700  | -1.28952700 | -1.11681100 |

INT4

O 1

|   |            |            |             |
|---|------------|------------|-------------|
| O | 0.12344500 | 1.21881700 | -1.22156000 |
| C | 0.17590100 | 1.66874900 | -0.02057300 |

|    |             |             |             |
|----|-------------|-------------|-------------|
| O  | 0.24231600  | 0.99126100  | 1.02418600  |
| O  | -2.00742300 | -1.04164200 | 0.89462100  |
| C  | -2.56953000 | -0.80195400 | -0.21323500 |
| O  | -2.00991800 | -0.65112700 | -1.33830700 |
| O  | 2.06192500  | -0.92515100 | -1.35930400 |
| C  | 2.61728000  | -1.19588800 | -0.25458900 |
| O  | 2.04741500  | -1.47444200 | 0.84047300  |
| C  | 4.09278300  | -1.17805000 | -0.23325800 |
| C  | 4.80236600  | -1.02474800 | -1.41981800 |
| C  | 4.76166500  | -1.29399900 | 0.98142000  |
| C  | 6.19882400  | -0.99722000 | -1.38493400 |
| C  | 6.15740300  | -1.24690100 | 1.00705400  |
| C  | 6.88738300  | -1.10378900 | -0.17445700 |
| H  | 4.26667700  | -0.92700100 | -2.36407600 |
| H  | 4.19331400  | -1.40800600 | 1.90415100  |
| H  | 7.97682100  | -1.07096300 | -0.15272800 |
| C  | -4.04492400 | -0.77253400 | -0.19451100 |
| C  | -4.71551800 | -0.94288600 | 1.01275400  |
| C  | -4.75139100 | -0.69358700 | -1.39030900 |
| C  | -6.10812300 | -1.04713300 | 1.02001400  |
| C  | -6.14401600 | -0.80948600 | -1.37294000 |
| C  | -6.83432900 | -0.97987000 | -0.17066000 |
| H  | -4.14898800 | -1.02614000 | 1.93983700  |
| H  | -4.21366200 | -0.58106600 | -2.33185100 |
| H  | -7.91892800 | -1.08961300 | -0.16600000 |
| C  | 0.13464500  | 3.15935200  | 0.10765200  |
| C  | 0.10952900  | 3.71762900  | 1.38634700  |
| C  | 0.09653900  | 3.98738100  | -1.01639600 |
| C  | 0.03939500  | 5.10759400  | 1.54911600  |
| C  | 0.03316100  | 5.38085700  | -0.85885600 |
| C  | 0.00308200  | 5.94294100  | 0.42522400  |
| H  | 0.13751200  | 3.05710200  | 2.25368600  |
| H  | 0.11232500  | 3.54309300  | -2.01243700 |
| H  | -0.05210500 | 7.02532100  | 0.54715200  |
| C  | -0.01053900 | 6.24108000  | -2.00067300 |
| C  | -6.84657300 | -0.84237000 | -2.60273000 |
| C  | -0.00653200 | 5.66055300  | 2.86580800  |
| C  | -6.76107700 | -1.30745300 | 2.25034000  |
| C  | 6.82357400  | -1.32994000 | 2.25485100  |
| C  | 6.91798900  | -0.85521100 | -2.59682800 |
| N  | -0.04987100 | 6.95567100  | -2.91973700 |
| N  | -0.05108700 | 6.08835200  | 3.94779800  |
| N  | -7.39318300 | -0.92755200 | -3.62215400 |
| N  | -7.24644700 | -1.57107800 | 3.27036600  |
| N  | 7.33816500  | -1.38646000 | 3.29289300  |
| N  | 7.48982100  | -0.74210100 | -3.59944200 |
| C  | -0.10375500 | -2.86383800 | -0.45333600 |
| C  | -0.12324100 | -2.71325800 | 2.52302800  |
| H  | -0.02640400 | -2.54833000 | -1.60413300 |
| H  | 0.84422000  | -3.41959400 | -0.35780300 |
| C  | -1.28679000 | -3.79495600 | -0.41816800 |
| C  | 0.06808600  | -1.43444900 | 3.05608700  |
| H  | -1.12232900 | -3.15933500 | 2.51530000  |
| H  | 0.70974700  | -3.41933300 | 2.44702200  |
| H  | -1.32989100 | -4.32446600 | 0.54269300  |
| H  | -2.24982100 | -3.28912300 | -0.56269900 |
| H  | -1.21214200 | -4.56602900 | -1.20146700 |
| H  | -0.77787600 | -0.85897700 | 3.44260200  |
| H  | 1.05945300  | -1.10194800 | 3.37630100  |
| Rh | 0.02518300  | -0.79335700 | -1.44418000 |

Rh 0.01478700 -1.30697200 0.92184600

TS4-5

0 3

|   |             |             |             |
|---|-------------|-------------|-------------|
| O | 0.05742000  | 1.36778500  | -1.27230700 |
| C | 0.11617000  | 1.77180700  | -0.08421700 |
| O | 0.18137400  | 1.04977100  | 0.95368200  |
| O | -1.99314200 | -0.87209500 | 0.85722300  |
| C | -2.55315700 | -1.03068900 | -0.26999300 |
| O | -1.97663700 | -1.20241800 | -1.37491900 |
| O | 2.02383000  | -1.38474000 | -1.36846500 |
| C | 2.60401900  | -1.31368800 | -0.25329100 |
| O | 2.04694000  | -1.19832100 | 0.88017900  |
| C | 4.08005800  | -1.33872000 | -0.23596400 |
| C | 4.78841500  | -1.21607600 | -1.42702400 |
| C | 4.75213100  | -1.40650000 | 0.98051100  |
| C | 6.18357200  | -1.13801500 | -1.39111700 |
| C | 6.14713000  | -1.35256200 | 1.00385600  |
| C | 6.87477400  | -1.21449600 | -0.17956200 |
| H | 4.25015400  | -1.14954200 | -2.37273800 |
| H | 4.18587900  | -1.48094200 | 1.90842400  |
| H | 7.96252600  | -1.14590200 | -0.15786000 |
| C | -4.02867200 | -1.03812200 | -0.25248800 |
| C | -4.70421000 | -1.13687900 | 0.96025600  |
| C | -4.73325200 | -0.95578700 | -1.44864700 |
| C | -6.10057300 | -1.16538700 | 0.97200800  |
| C | -6.13014400 | -0.95534500 | -1.42342800 |
| C | -6.82524500 | -1.06702000 | -0.21728100 |
| H | -4.14104600 | -1.19665100 | 1.89159200  |
| H | -4.19209100 | -0.88307600 | -2.39220100 |
| H | -7.91525400 | -1.07708900 | -0.20532100 |
| C | 0.10091100  | 3.25169900  | 0.13597300  |
| C | 0.08467900  | 3.77712100  | 1.42915300  |
| C | 0.08348100  | 4.10963900  | -0.96558300 |
| C | 0.04593100  | 5.16584300  | 1.62292000  |
| C | 0.05057200  | 5.49877400  | -0.77730900 |
| C | 0.03050300  | 6.02963200  | 0.51946700  |
| H | 0.09664300  | 3.09847500  | 2.28273400  |
| H | 0.09264300  | 3.68554600  | -1.97032800 |
| H | 0.00022100  | 7.10946400  | 0.66946700  |
| C | 0.03096900  | 6.37397100  | -1.90767900 |
| C | -6.84331000 | -0.83049000 | -2.64022500 |
| C | 0.01328600  | 5.70310400  | 2.94694600  |
| C | -6.77305700 | -1.30531700 | 2.21094800  |
| C | 6.80419600  | -1.39151200 | 2.25830300  |
| C | 6.89969500  | -0.91435600 | -2.59304200 |
| N | 0.01313700  | 7.08367800  | -2.83096500 |
| N | -0.01928400 | 6.13906600  | 4.02629000  |
| N | -7.40984400 | -0.71370000 | -3.64526000 |
| N | -7.29206400 | -1.43637800 | 3.23996800  |
| N | 7.29353300  | -1.40495300 | 3.30987900  |
| N | 7.47413400  | -0.68457400 | -3.57422700 |
| C | -0.03813400 | -3.29006600 | 0.65481500  |
| C | -0.33196700 | -2.63257800 | 2.46139800  |
| H | -0.00250400 | -2.80511500 | -0.34566500 |
| H | 0.95623000  | -3.72892900 | 0.80268900  |
| C | -1.14722100 | -4.30764800 | 0.61816500  |
| C | 0.03484700  | -1.30929000 | 2.90931000  |
| H | -1.40228600 | -2.85135200 | 2.52637600  |
| H | 0.27537100  | -3.46718700 | 2.82972700  |

|    |             |             |             |
|----|-------------|-------------|-------------|
| H  | -1.18234700 | -4.93133400 | 1.52285500  |
| H  | -2.13399300 | -3.83574800 | 0.50360200  |
| H  | -1.01307200 | -4.98230500 | -0.23969800 |
| H  | -0.74312700 | -0.67878200 | 3.35303800  |
| H  | 1.03904000  | -1.14618000 | 3.31498200  |
| Rh | 0.05302000  | -0.74524900 | -1.79801900 |
| Rh | 0.02771500  | -1.02633900 | 0.89340400  |

INT5

0 3

|   |             |             |             |
|---|-------------|-------------|-------------|
| O | 0.04726100  | 1.39886800  | -1.24263300 |
| C | 0.10971700  | 1.76412800  | -0.05004800 |
| O | 0.17437300  | 1.00529700  | 0.97437100  |
| O | -1.99464200 | -0.86629400 | 0.75677000  |
| C | -2.55006700 | -0.99209600 | -0.37735600 |
| O | -1.97296300 | -1.12296300 | -1.48679300 |
| O | 2.03637300  | -1.28360700 | -1.46885000 |
| C | 2.60895900  | -1.26115200 | -0.34848300 |
| O | 2.04783100  | -1.18712200 | 0.78674100  |
| C | 4.08407800  | -1.30373200 | -0.32512700 |
| C | 4.79944300  | -1.14159400 | -1.50686300 |
| C | 4.74902200  | -1.43337000 | 0.89016300  |
| C | 6.19510500  | -1.08558300 | -1.46175900 |
| C | 6.14455100  | -1.40314300 | 0.92078100  |
| C | 6.87979800  | -1.22513800 | -0.25241900 |
| H | 4.26688100  | -1.02770900 | -2.45123900 |
| H | 4.17698600  | -1.53913800 | 1.81151100  |
| H | 7.96837000  | -1.17481700 | -0.22354900 |
| C | -4.02543700 | -1.00695100 | -0.36234700 |
| C | -4.70314600 | -1.15607800 | 0.84393700  |
| C | -4.72730300 | -0.88030000 | -1.55582400 |
| C | -6.09933700 | -1.19353400 | 0.85008100  |
| C | -6.12397300 | -0.88487000 | -1.53391200 |
| C | -6.82180000 | -1.04954600 | -0.33575900 |
| H | -4.14215100 | -1.24916800 | 1.77387900  |
| H | -4.18422400 | -0.76840700 | -2.49439400 |
| H | -7.91176500 | -1.06508500 | -0.32705200 |
| C | 0.10277500  | 3.23033100  | 0.23876100  |
| C | 0.08524900  | 3.70038500  | 1.55304800  |
| C | 0.09362800  | 4.13327700  | -0.82668800 |
| C | 0.05365000  | 5.07976200  | 1.80411300  |
| C | 0.06799900  | 5.51330100  | -0.58003400 |
| C | 0.04664500  | 5.98915800  | 0.73803800  |
| H | 0.09042700  | 2.98871600  | 2.37918900  |
| H | 0.10346400  | 3.75146900  | -1.84829100 |
| H | 0.02192800  | 7.06190000  | 0.93319600  |
| C | 0.05733900  | 6.43784500  | -1.67071400 |
| C | -6.83184700 | -0.70773200 | -2.74667400 |
| C | 0.01955900  | 5.55771800  | 3.15026500  |
| C | -6.77557400 | -1.39221600 | 2.07855900  |
| C | 6.79668600  | -1.50991300 | 2.17345500  |
| C | 6.91741100  | -0.81937200 | -2.65057300 |
| N | 0.04690700  | 7.19155600  | -2.55851900 |
| N | -0.01423900 | 5.94057500  | 4.24931400  |
| N | -7.38979800 | -0.54403000 | -3.74971700 |
| N | -7.30037100 | -1.57490800 | 3.09658100  |
| N | 7.28487800  | -1.58089400 | 3.22308000  |
| N | 7.49381900  | -0.55306300 | -3.62107000 |
| C | -0.12411400 | -3.42765800 | 1.49827800  |
| C | -0.64206000 | -2.69860300 | 2.74444200  |

|    |             |             |             |
|----|-------------|-------------|-------------|
| H  | -0.15565600 | -2.82993100 | 0.51761700  |
| H  | 0.94530600  | -3.66510600 | 1.61120100  |
| C  | -0.93474400 | -4.65709000 | 1.14584300  |
| C  | -0.03159100 | -1.32903300 | 2.81569200  |
| H  | -1.73879600 | -2.62030100 | 2.67745300  |
| H  | -0.43685900 | -3.32686600 | 3.63144100  |
| H  | -0.94320700 | -5.35049200 | 1.99911900  |
| H  | -1.98097900 | -4.39666600 | 0.92955800  |
| H  | -0.53203900 | -5.19588800 | 0.27924000  |
| H  | -0.64349400 | -0.55326200 | 3.29403700  |
| H  | 1.00763300  | -1.29791100 | 3.17418200  |
| Rh | 0.05907100  | -0.70351800 | -1.90831700 |
| Rh | 0.03004500  | -0.99720600 | 0.80016400  |

INT6

0 1

|   |             |             |             |
|---|-------------|-------------|-------------|
| O | -0.15882200 | 1.25900400  | -1.21639100 |
| C | -0.27068200 | 1.74297800  | -0.07741800 |
| O | -0.34220500 | 1.08694700  | 1.02701700  |
| O | -2.04720700 | -1.24228300 | 1.00219500  |
| C | -2.63714900 | -1.19306600 | -0.12190500 |
| O | -2.09289100 | -1.08531200 | -1.25546800 |
| O | 1.97396400  | -0.81640700 | -1.28829000 |
| C | 2.52811300  | -0.62905700 | -0.16998900 |
| O | 1.95449500  | -0.55312000 | 0.96097400  |
| C | 4.00068300  | -0.56845400 | -0.15634800 |
| C | 4.70027600  | -0.55954100 | -1.35853600 |
| C | 4.67894200  | -0.63358700 | 1.05723500  |
| C | 6.09551500  | -0.62107500 | -1.34114800 |
| C | 6.07397700  | -0.71211400 | 1.06227600  |
| C | 6.79404300  | -0.69835600 | -0.13406200 |
| H | 4.15583600  | -0.53112600 | -2.30245700 |
| H | 4.11837000  | -0.65863100 | 1.99184500  |
| H | 7.88153700  | -0.77379800 | -0.12740500 |
| C | -4.10975600 | -1.25729000 | -0.08627300 |
| C | -4.76459100 | -1.37676200 | 1.13577400  |
| C | -4.83361000 | -1.17219000 | -1.27154000 |
| C | -6.16060800 | -1.41303400 | 1.16856500  |
| C | -6.22960500 | -1.20133400 | -1.22673500 |
| C | -6.90430700 | -1.32461600 | -0.00980700 |
| H | -4.18586100 | -1.43393300 | 2.05739600  |
| H | -4.30845600 | -1.07308300 | -2.22157200 |
| H | -7.99387200 | -1.34477100 | 0.01941700  |
| C | -0.31185500 | 3.22886500  | 0.07623400  |
| C | -0.32820900 | 3.81600200  | 1.34235200  |
| C | -0.29483900 | 4.03132500  | -1.06643400 |
| C | -0.32124700 | 5.21247300  | 1.46869200  |
| C | -0.29373200 | 5.42821900  | -0.94446800 |
| C | -0.30599000 | 6.02167600  | 0.32514800  |
| H | -0.33566600 | 3.18263500  | 2.22970300  |
| H | -0.27502000 | 3.55763300  | -2.04882500 |
| H | -0.29801200 | 7.10789000  | 0.42235000  |
| C | -0.26626900 | 6.25151600  | -2.11272000 |
| C | -0.31335800 | 5.80789300  | 2.76733000  |
| C | -6.96309700 | -1.08648400 | -2.43328900 |
| C | -6.81385400 | -1.52652700 | 2.42079200  |
| C | 6.74571200  | -0.88705500 | 2.29770100  |
| C | 6.79185200  | -0.67599600 | -2.57317700 |
| C | 0.42428300  | -3.40813100 | 0.30795900  |
| C | 0.01514800  | -3.01402400 | -1.09581300 |

|    |             |             |             |
|----|-------------|-------------|-------------|
| H  | 0.74866300  | -3.40956800 | -1.81828100 |
| H  | -0.98124000 | -3.40491800 | -1.35413500 |
| H  | 0.12365600  | -2.69915200 | 1.17815900  |
| H  | -0.20808500 | -4.23885400 | 0.67876900  |
| C  | 1.88865700  | -3.76306200 | 0.50328400  |
| H  | 2.52290800  | -3.06911000 | -0.07026200 |
| H  | 2.04712400  | -4.73895400 | 0.01412300  |
| C  | 2.32819800  | -3.82283900 | 1.94936900  |
| H  | 2.22809900  | -2.83984700 | 2.43617500  |
| H  | 1.72640100  | -4.53813900 | 2.52923800  |
| H  | 3.37804100  | -4.12923600 | 2.04602500  |
| N  | -0.23822900 | 6.92438500  | -3.06272700 |
| N  | -0.29717000 | 6.28344200  | 3.82993900  |
| N  | -7.54705900 | -0.97884800 | -3.42963800 |
| N  | -7.31781800 | -1.61451100 | 3.46184500  |
| N  | 7.26174400  | -1.08535000 | 3.31755500  |
| N  | 7.32777800  | -0.76100700 | -3.59807900 |
| Rh | 0.05810000  | -0.99683500 | -1.34187600 |
| Rh | 0.04464800  | -0.90340000 | 1.04518500  |

TS6-7

0 3

|   |             |             |             |
|---|-------------|-------------|-------------|
| O | -0.22430800 | 0.94811200  | 1.01907700  |
| C | -0.17332000 | 1.74504300  | 0.04488600  |
| O | -0.09105000 | 1.42527600  | -1.17308800 |
| O | 1.96377500  | -1.07143700 | -1.50163100 |
| C | 2.55140600  | -0.97971000 | -0.39119100 |
| O | 2.00324700  | -0.97020500 | 0.75168500  |
| O | -2.04662700 | -1.39174800 | 0.79568600  |
| C | -2.61024900 | -1.35776500 | -0.33853100 |
| O | -2.03265700 | -1.29271200 | -1.45708900 |
| C | -4.08654100 | -1.36928500 | -0.33697500 |
| C | -4.78037700 | -1.54206200 | 0.85676200  |
| C | -4.77326500 | -1.13564400 | -1.52500100 |
| C | -6.17613900 | -1.48249500 | 0.85741900  |
| C | -6.16840100 | -1.05579900 | -1.51098800 |
| C | -6.88097100 | -1.23598900 | -0.32309300 |
| H | -4.23162300 | -1.70539400 | 1.78412400  |
| H | -4.21695500 | -0.98957700 | -2.45089600 |
| H | -7.96897500 | -1.16776500 | -0.31435000 |
| C | 4.02467100  | -0.88937300 | -0.40470400 |
| C | 4.68978900  | -0.66635300 | -1.60693200 |
| C | 4.73797600  | -1.02174300 | 0.78258900  |
| C | 6.08316300  | -0.55946700 | -1.61322400 |
| C | 6.13266500  | -0.94366700 | 0.76174700  |
| C | 6.81576400  | -0.70524800 | -0.43260000 |
| H | 4.11878400  | -0.56433800 | -2.52989100 |
| H | 4.20681700  | -1.18438300 | 1.72043200  |
| H | 7.90328200  | -0.63011700 | -0.44338000 |
| C | -0.21420600 | 3.21223100  | 0.34546600  |
| C | -0.24230100 | 4.11735700  | -0.71686400 |
| C | -0.21565100 | 3.68242000  | 1.66093300  |
| C | -0.27522300 | 5.49666100  | -0.47199200 |
| C | -0.23994500 | 5.06392500  | 1.91303400  |
| C | -0.27205700 | 5.97295100  | 0.84538800  |
| H | -0.23815100 | 3.73702800  | -1.73873300 |
| H | -0.19364300 | 2.96728700  | 2.48455200  |
| H | -0.29315600 | 7.04562800  | 1.04159500  |
| C | -0.22745800 | 5.56627100  | 3.25322100  |
| C | -0.30985100 | 6.40372000  | -1.57617200 |

|    |             |             |             |
|----|-------------|-------------|-------------|
| C  | 6.84543800  | -1.11290800 | 1.97458600  |
| C  | 6.75507600  | -0.28182900 | -2.83023000 |
| C  | -6.85615100 | -0.73520100 | -2.70874600 |
| C  | -6.86857300 | -1.63706900 | 2.08421600  |
| N  | -0.21328700 | 6.00076000  | 4.33434000  |
| N  | -0.33844800 | 7.11873500  | -2.49495500 |
| N  | 7.39618900  | -1.26837400 | 2.98364400  |
| N  | 7.29177100  | -0.03508900 | -3.82877500 |
| N  | -7.39800100 | -0.43375100 | -3.68952200 |
| N  | -7.40491800 | -1.75111000 | 3.10655100  |
| C  | 1.50192800  | -3.71326100 | 2.07182000  |
| C  | 0.18758800  | -2.96878900 | 2.03255100  |
| H  | 1.47141000  | -4.33912600 | 2.98017500  |
| H  | 2.31554000  | -2.99192800 | 2.24037800  |
| C  | 1.78905400  | -4.56902300 | 0.85724800  |
| C  | 0.01250200  | -1.76325100 | 2.79786500  |
| H  | -0.69570100 | -3.62369100 | 1.97131400  |
| H  | 0.98680000  | -5.29833500 | 0.67179500  |
| H  | 1.88702400  | -3.95580700 | -0.05283200 |
| H  | 2.72245000  | -5.13480300 | 0.97094100  |
| H  | -0.95660500 | -1.54840500 | 3.25675300  |
| H  | 0.88129600  | -1.34564700 | 3.31861300  |
| H  | 0.10558700  | -2.74434200 | 0.56742500  |
| Rh | 0.02139700  | -1.17612900 | 0.81234500  |
| Rh | 0.07314600  | -0.65344200 | -1.78899100 |

#### INT7

0 1

|   |             |             |             |
|---|-------------|-------------|-------------|
| O | 0.35002900  | 0.86501500  | 1.15937400  |
| C | 0.28500100  | 1.64892800  | 0.19970700  |
| O | 0.20559600  | 1.32175300  | -1.04418700 |
| O | 2.09938100  | -0.82767500 | -1.52632300 |
| C | 2.63175800  | -1.24993200 | -0.45571000 |
| O | 2.04657300  | -1.59979900 | 0.60820500  |
| O | -2.00514900 | -0.95230800 | 0.65161400  |
| C | -2.53030700 | -0.68498200 | -0.46723900 |
| O | -1.93363300 | -0.46575500 | -1.56348900 |
| C | -4.00546200 | -0.67447900 | -0.52214300 |
| C | -4.74502300 | -0.99135600 | 0.61274800  |
| C | -4.64347200 | -0.43142600 | -1.73502200 |
| C | -6.13748700 | -1.06891200 | 0.52692500  |
| C | -6.03523400 | -0.52066100 | -1.81254000 |
| C | -6.79424700 | -0.83414400 | -0.68308100 |
| H | -4.23413200 | -1.19725300 | 1.55337900  |
| H | -4.05165900 | -0.20038100 | -2.62039700 |
| H | -7.87936500 | -0.91526000 | -0.74896800 |
| C | 4.10709300  | -1.31547000 | -0.45731500 |
| C | 4.80329500  | -1.07064400 | -1.63762200 |
| C | 4.79229800  | -1.56167700 | 0.72781800  |
| C | 6.20016400  | -1.07601000 | -1.62909600 |
| C | 6.18960800  | -1.54310100 | 0.73061400  |
| C | 6.90474100  | -1.30833800 | -0.44578300 |
| H | 4.25482100  | -0.86422400 | -2.55635500 |
| H | 4.23678600  | -1.74091900 | 1.64830700  |
| H | 7.99473200  | -1.29134300 | -0.43703600 |
| C | 0.27226200  | 3.11969000  | 0.44957000  |
| C | 0.29290300  | 4.02600400  | -0.61178900 |
| C | 0.20780900  | 3.58331800  | 1.76525300  |
| C | 0.25038600  | 5.40374300  | -0.35749600 |
| C | 0.15363900  | 4.96073000  | 2.02263800  |

|    |             |             |             |
|----|-------------|-------------|-------------|
| C  | 0.17792200  | 5.87428800  | 0.96014900  |
| H  | 0.33816700  | 3.65718600  | -1.63676600 |
| H  | 0.18987300  | 2.86273200  | 2.58393900  |
| H  | 0.13623500  | 6.94599800  | 1.15794800  |
| C  | 0.05785400  | 5.43922000  | 3.36628900  |
| N  | -0.03152900 | 5.83394100  | 4.45818100  |
| C  | 0.27032000  | 6.32525200  | -1.44847900 |
| N  | 0.28388700  | 7.06536300  | -2.34683300 |
| C  | 6.87738600  | -1.71718700 | 1.95688400  |
| N  | 7.41563300  | -1.82600200 | 2.97860900  |
| C  | 6.89676100  | -0.80725400 | -2.83410600 |
| N  | 7.44078600  | -0.56971000 | -3.83092000 |
| C  | -6.66288300 | -0.34919300 | -3.07145300 |
| N  | -7.14109600 | -0.24563900 | -4.12321000 |
| C  | -6.87745400 | -1.44544400 | 1.67466100  |
| N  | -7.45760000 | -1.78705600 | 2.61916900  |
| C  | -0.24487700 | -2.76126600 | 2.43745800  |
| C  | 0.14438600  | -1.50652300 | 2.89344800  |
| H  | -0.59558400 | -0.81517600 | 3.30941000  |
| H  | 1.19048200  | -1.27742300 | 3.10960500  |
| H  | -0.20742100 | -2.74320200 | 0.13040900  |
| H  | 0.53850400  | -3.51150900 | 2.27018600  |
| C  | -1.63526300 | -3.29553000 | 2.59659700  |
| H  | -2.33135900 | -2.45690400 | 2.75412700  |
| H  | -1.63856000 | -3.85444000 | 3.55092000  |
| C  | -2.12801300 | -4.20376300 | 1.48913000  |
| H  | -2.27194200 | -3.65115800 | 0.54927000  |
| H  | -1.41684700 | -5.01773100 | 1.28480200  |
| H  | -3.08890600 | -4.66760200 | 1.74923100  |
| Rh | 0.09103100  | -0.55460600 | -1.61616100 |
| Rh | 0.01359300  | -1.33585600 | 0.73472400  |



## H-Pd-DHKUST-1

INT1

0 3

|    |             |             |             |
|----|-------------|-------------|-------------|
| O  | -0.11328300 | 0.94717900  | -1.19223800 |
| C  | -0.10868900 | 1.48958500  | -0.04316800 |
| O  | -0.15003500 | 0.88891000  | 1.05587700  |
| O  | -2.04869500 | -1.46908700 | 1.08769800  |
| C  | -2.63267800 | -1.51079500 | -0.03821400 |
| O  | -2.10317100 | -1.52736100 | -1.18107200 |
| O  | 2.05487400  | -1.21235100 | -1.18483200 |
| C  | 2.58140900  | -1.18845800 | -0.04116500 |
| O  | 1.99486900  | -1.17224300 | 1.08424600  |
| C  | 4.05679600  | -1.21530400 | 0.01247100  |
| C  | 4.77692400  | -1.25740500 | -1.17578800 |
| C  | 4.70914400  | -1.27477400 | 1.23968100  |
| C  | 6.16751400  | -1.37314900 | -1.13172700 |
| C  | 6.10093200  | -1.38860700 | 1.27077100  |
| C  | 6.84191700  | -1.43618400 | 0.08842200  |
| H  | 4.25134000  | -1.22592300 | -2.12987700 |
| H  | 4.13250700  | -1.25714200 | 2.16419600  |
| H  | 7.92636300  | -1.54316900 | 0.11806000  |
| C  | -4.10862400 | -1.49684400 | 0.01337200  |
| C  | -4.76308600 | -1.45194700 | 1.24023200  |
| C  | -4.82708200 | -1.43807300 | -1.17546800 |
| C  | -6.15463900 | -1.33466500 | 1.27101700  |
| C  | -6.21771700 | -1.31937300 | -1.13224200 |
| C  | -6.89359900 | -1.27032600 | 0.08799800  |
| H  | -4.18776400 | -1.47907900 | 2.16531800  |
| H  | -4.29961600 | -1.45430300 | -2.12892900 |
| H  | -7.97755400 | -1.15820900 | 0.11735700  |
| C  | -0.02531200 | 2.98393000  | -0.01801600 |
| C  | 0.02662300  | 3.63990600  | 1.21281900  |
| C  | 0.03501600  | 3.71626600  | -1.20528800 |
| C  | 0.14469500  | 5.03592900  | 1.26118900  |
| C  | 0.15063000  | 5.11387900  | -1.16196900 |
| C  | 0.20598900  | 5.77547600  | 0.07263900  |
| H  | -0.01687600 | 3.05369400  | 2.13150400  |
| H  | -0.00130700 | 3.19418600  | -2.16223000 |
| H  | 0.30131400  | 6.86139500  | 0.10738200  |
| C  | 0.22563600  | 5.87059600  | -2.37303300 |
| C  | -6.92474100 | -1.17773400 | -2.35022900 |
| C  | 0.21681900  | 5.69833900  | 2.52554900  |
| C  | -6.80631500 | -1.21209300 | 2.52226000  |
| C  | 6.75325700  | -1.51787700 | 2.52057700  |
| C  | 6.87589300  | -1.48995700 | -2.35094100 |
| N  | 0.29358500  | 6.49331900  | -3.35492700 |
| N  | 0.28306900  | 6.22483800  | 3.56198300  |
| N  | -7.46076700 | -1.01898500 | -3.36593400 |
| N  | -7.31151300 | -1.07053500 | 3.55637300  |
| N  | 7.26240800  | -1.66140200 | 3.55230800  |
| N  | 7.41124700  | -1.62489700 | -3.37020300 |
| H  | 0.07895700  | -2.82464900 | 1.17100500  |
| Pd | -0.03746000 | -1.20291000 | -1.37416100 |
| Pd | -0.02928500 | -1.29764700 | 1.16070600  |

INT2

0 3

|   |            |            |             |
|---|------------|------------|-------------|
| O | 0.01849500 | 0.81701800 | 1.07643300  |
| C | 0.01261700 | 1.38869600 | -0.04143400 |

|    |             |             |             |
|----|-------------|-------------|-------------|
| O  | 0.00436000  | 0.82465600  | -1.17584200 |
| O  | 2.06753300  | -1.51635200 | -1.28531200 |
| C  | 2.62942100  | -1.44360700 | -0.16083600 |
| O  | 2.08161600  | -1.42327000 | 0.98083700  |
| O  | -2.08601300 | -1.38519100 | 0.97670300  |
| C  | -2.63603000 | -1.40663900 | -0.16398000 |
| O  | -2.07679600 | -1.48671600 | -1.28919800 |
| C  | -4.11240100 | -1.29201300 | -0.18263100 |
| C  | -4.81863800 | -1.10575300 | 1.00061100  |
| C  | -4.77555500 | -1.30296400 | -1.40610000 |
| C  | -6.20267500 | -0.91656700 | 0.95191700  |
| C  | -6.15976000 | -1.12041400 | -1.44420800 |
| C  | -6.88471800 | -0.92636500 | -0.26687400 |
| H  | -4.28786400 | -1.08414600 | 1.95228000  |
| H  | -4.20692800 | -1.43365400 | -2.32637800 |
| H  | -7.96266500 | -0.76669000 | -0.29879900 |
| C  | 4.10597000  | -1.33106100 | -0.18324000 |
| C  | 4.76453900  | -1.34357500 | -1.40911500 |
| C  | 4.81541100  | -1.13290500 | 0.99622100  |
| C  | 6.14683300  | -1.14911800 | -1.45411100 |
| C  | 6.19755100  | -0.93125500 | 0.94063300  |
| C  | 6.87485800  | -0.94224800 | -0.28091300 |
| H  | 4.19309600  | -1.48097300 | -2.32663400 |
| H  | 4.28801500  | -1.10772800 | 1.94970200  |
| H  | 7.95076900  | -0.77045900 | -0.31825200 |
| C  | 0.01465100  | 2.89168500  | -0.05126900 |
| C  | -0.00046400 | 3.58498500  | -1.26349200 |
| C  | 0.03020000  | 3.59790100  | 1.15434500  |
| C  | -0.00073800 | 4.98822100  | -1.27494100 |
| C  | 0.03098600  | 5.00201800  | 1.15199300  |
| C  | 0.01525800  | 5.69787300  | -0.06578900 |
| H  | -0.01252900 | 3.02432700  | -2.19901200 |
| H  | 0.04154400  | 3.04486400  | 2.09449700  |
| H  | 0.01527500  | 6.78859000  | -0.07188300 |
| C  | 0.04720400  | 5.73212300  | 2.38486500  |
| C  | -0.01795800 | 5.69344900  | -2.52064500 |
| C  | 6.90525100  | -0.65345900 | 2.13605900  |
| C  | 6.78797500  | -1.10933500 | -2.71747700 |
| C  | -6.81009100 | -1.08816400 | -2.70308100 |
| C  | -6.90839500 | -0.66173300 | 2.15347300  |
| N  | 0.06032700  | 6.33525900  | 3.38242400  |
| N  | -0.03264600 | 6.26077100  | -3.53835300 |
| N  | 7.46284200  | -0.38882200 | 3.11815200  |
| N  | 7.26887200  | -1.05160900 | -3.77159300 |
| N  | -7.30356600 | -1.04104600 | -3.75189200 |
| N  | -7.46403200 | -0.42148300 | 3.14284400  |
| Pd | -0.00341900 | -1.34339300 | -1.42218600 |
| Pd | -0.00224600 | -1.39292500 | 1.13379000  |
| C  | -0.00728300 | -2.18820600 | 3.58793600  |
| C  | -0.00078400 | -0.84196600 | 3.62066300  |
| H  | -0.92684800 | -0.26212100 | 3.65028600  |
| H  | 0.93082100  | -0.27106500 | 3.64979000  |
| H  | -0.01758700 | -2.91752200 | 1.02746900  |
| H  | 0.92049700  | -2.76598200 | 3.60539500  |
| H  | -0.94054200 | -2.75705200 | 3.60619700  |

TS2-3

0 3

|   |             |            |             |
|---|-------------|------------|-------------|
| O | -0.18656300 | 0.81303300 | -1.09596600 |
| C | -0.08810300 | 1.40127500 | 0.01391100  |

|    |             |             |             |
|----|-------------|-------------|-------------|
| O  | -0.02925400 | 0.85625900  | 1.14947500  |
| O  | -2.08678700 | -1.53365400 | 1.28684500  |
| C  | -2.69235800 | -1.52848000 | 0.17889100  |
| O  | -2.18937500 | -1.57932600 | -0.97496300 |
| O  | 2.10946700  | -1.20460400 | -0.95111300 |
| C  | 2.62281500  | -1.26481300 | 0.19811200  |
| O  | 2.02840800  | -1.39198500 | 1.30417000  |
| C  | 4.09949200  | -1.17321700 | 0.26343600  |
| C  | 4.82953300  | -1.05684300 | -0.91306400 |
| C  | 4.74493000  | -1.19131100 | 1.49550400  |
| C  | 6.22118700  | -0.95943100 | -0.85490500 |
| C  | 6.13775300  | -1.09113200 | 1.54232500  |
| C  | 6.88798000  | -0.97541700 | 0.37039100  |
| H  | 4.31098000  | -1.03822100 | -1.87118600 |
| H  | 4.16032800  | -1.27874900 | 2.41121800  |
| H  | 7.97436100  | -0.89618700 | 0.41314000  |
| C  | -4.16572500 | -1.38934300 | 0.25244800  |
| C  | -4.79520800 | -1.31889600 | 1.49105500  |
| C  | -4.89090000 | -1.19778400 | -0.91733500 |
| C  | -6.16331700 | -1.04172100 | 1.55303500  |
| C  | -6.25573900 | -0.90981700 | -0.84454200 |
| C  | -6.90597200 | -0.83649000 | 0.38806600  |
| H  | -4.21001000 | -1.44066900 | 2.40240000  |
| H  | -4.38043600 | -1.22630400 | -1.87963300 |
| H  | -7.96596000 | -0.58791100 | 0.44302300  |
| C  | -0.02044100 | 2.90324700  | -0.01658000 |
| C  | 0.04716100  | 3.62822100  | 1.17603400  |
| C  | -0.00174600 | 3.57517500  | -1.24123000 |
| C  | 0.13329100  | 5.02933000  | 1.14729700  |
| C  | 0.08995400  | 4.97549300  | -1.27953800 |
| C  | 0.15602600  | 5.70338900  | -0.08269500 |
| H  | 0.03563700  | 3.09316400  | 2.12660700  |
| H  | -0.05303000 | 2.99845300  | -2.16544800 |
| H  | 0.22780200  | 6.79148100  | -0.10792000 |
| C  | 0.12546300  | 5.66064500  | -2.53734500 |
| C  | 0.20537400  | 5.77661100  | 2.36770400  |
| C  | -6.93937000 | -0.59271700 | -2.04289500 |
| C  | -6.77530700 | -0.87735400 | 2.81992500  |
| C  | 6.79451500  | -1.10099000 | 2.79639900  |
| C  | 6.94131800  | -0.83987900 | -2.06666800 |
| N  | 0.16046000  | 6.21541900  | -3.56203000 |
| N  | 0.26683500  | 6.39054000  | 3.35672900  |
| N  | -7.43287000 | -0.27712800 | -3.04372500 |
| N  | -7.24262500 | -0.69373000 | 3.86545800  |
| N  | 7.32397500  | -1.10635200 | 3.82795500  |
| N  | 7.48676200  | -0.74338300 | -3.08508600 |
| Pd | -0.03375500 | -1.33004000 | 1.35978900  |
| Pd | -0.04162700 | -1.34866500 | -1.23201900 |
| C  | 0.06097900  | -2.68522600 | -3.10839100 |
| C  | -0.04616000 | -1.33993000 | -3.44355600 |
| H  | 0.84024400  | -0.75231600 | -3.69475400 |
| H  | -1.01550800 | -0.89924900 | -3.68903900 |
| H  | 0.08175300  | -2.89370800 | -1.42881200 |
| H  | -0.81868300 | -3.33286000 | -3.16363900 |
| H  | 1.03064500  | -3.18740200 | -3.17077300 |

INT3

0 3

|   |            |            |            |
|---|------------|------------|------------|
| O | 0.17446400 | 0.87869400 | 1.16204800 |
| C | 0.14430000 | 1.54733800 | 0.10628900 |

|    |             |             |             |
|----|-------------|-------------|-------------|
| O  | 0.14108300  | 1.08157100  | -1.07770800 |
| O  | 2.11520900  | -1.37215300 | -1.29031000 |
| C  | 2.66204500  | -1.41801200 | -0.15539000 |
| O  | 2.09386500  | -1.49373100 | 0.97552800  |
| O  | -1.99636700 | -1.15553200 | 0.99526400  |
| C  | -2.56927700 | -1.07621000 | -0.13219300 |
| O  | -2.03079900 | -1.06559100 | -1.27217500 |
| C  | -4.04578000 | -1.01005100 | -0.11028900 |
| C  | -4.73910000 | -1.11833900 | 1.09076300  |
| C  | -4.73067600 | -0.85923100 | -1.31161600 |
| C  | -6.13616100 | -1.07901500 | 1.08037300  |
| C  | -6.12615600 | -0.81758400 | -1.31019600 |
| C  | -6.84047200 | -0.92717900 | -0.11621800 |
| H  | -4.19226400 | -1.23641000 | 2.02646900  |
| H  | -4.17347700 | -0.77859500 | -2.24449100 |
| H  | -7.93028600 | -0.89959300 | -0.11664300 |
| C  | 4.13852600  | -1.33374800 | -0.13634300 |
| C  | 4.81356500  | -1.08240300 | -1.32669400 |
| C  | 4.83170900  | -1.41044400 | 1.06703200  |
| C  | 6.19676700  | -0.88956100 | -1.30866900 |
| C  | 6.21712100  | -1.22746800 | 1.07280400  |
| C  | 6.91057600  | -0.96649900 | -0.11134100 |
| H  | 4.25404600  | -1.00499700 | -2.25852500 |
| H  | 4.29006000  | -1.58552100 | 1.99657900  |
| H  | 7.98809500  | -0.80149200 | -0.09631500 |
| C  | 0.09070100  | 3.04419000  | 0.20837200  |
| C  | 0.02687900  | 3.81810300  | -0.95170700 |
| C  | 0.07879400  | 3.66220900  | 1.46133400  |
| C  | -0.05270500 | 5.21544400  | -0.86566600 |
| C  | 0.00071800  | 5.06127200  | 1.55494800  |
| C  | -0.06521200 | 5.83890300  | 0.38928200  |
| H  | 0.03339200  | 3.32551500  | -1.92452200 |
| H  | 0.12516300  | 3.04568200  | 2.36030900  |
| H  | -0.12958900 | 6.92535100  | 0.46070600  |
| C  | -0.02217800 | 5.71032800  | 2.83150000  |
| C  | -0.13081900 | 5.99254500  | -2.06395000 |
| C  | 6.91047600  | -1.24854700 | 2.30782100  |
| C  | 6.85236900  | -0.54560000 | -2.51690300 |
| C  | -6.80152400 | -0.67609900 | -2.54690100 |
| C  | -6.84633600 | -1.21021900 | 2.29850500  |
| C  | -0.02610800 | -3.38488100 | 1.05226300  |
| H  | 0.78953700  | -3.67606100 | 0.37251100  |
| H  | 0.28948000  | -3.59222700 | 2.08930800  |
| C  | -1.34002000 | -4.00343900 | 0.69075200  |
| H  | -2.14803000 | -3.72728100 | 1.38083600  |
| H  | -1.66017700 | -3.75136400 | -0.33166300 |
| H  | -1.25245600 | -5.10294800 | 0.72412400  |
| N  | -0.04662800 | 6.25763800  | 3.86020900  |
| N  | -0.19941600 | 6.60499300  | -3.05244500 |
| N  | 7.45381800  | -1.23583600 | 3.33235600  |
| N  | 7.34417000  | -0.22161300 | -3.51628300 |
| N  | -7.31120500 | -0.56830800 | -3.58296700 |
| N  | -7.42152100 | -1.33011200 | 3.29833000  |
| Pd | 0.04619400  | -1.35153000 | 1.08557300  |
| Pd | 0.05359300  | -1.04647600 | -1.43866000 |

INT4

0 3

|   |             |            |             |
|---|-------------|------------|-------------|
| O | -0.09128500 | 1.26168700 | -1.25233000 |
| C | -0.16725600 | 1.70211100 | -0.06730000 |

|    |             |             |             |
|----|-------------|-------------|-------------|
| O  | -0.31228100 | 1.02117300  | 0.97562400  |
| O  | -2.08834700 | -1.43818700 | 0.72068700  |
| C  | -2.64564700 | -1.32254400 | -0.40828500 |
| O  | -2.09301100 | -1.21292100 | -1.53501600 |
| O  | 2.06748400  | -0.88395200 | -1.49227900 |
| C  | 2.60758500  | -0.87576700 | -0.35500000 |
| O  | 2.03744600  | -0.88189600 | 0.77450300  |
| C  | 4.08694500  | -0.92419500 | -0.32452200 |
| C  | 4.80047500  | -0.87721500 | -1.51653100 |
| C  | 4.74428100  | -1.13378200 | 0.88319200  |
| C  | 6.18574300  | -1.05567700 | -1.49540300 |
| C  | 6.12884900  | -1.32045700 | 0.89264400  |
| C  | 6.86250800  | -1.27616200 | -0.29422000 |
| H  | 4.27064000  | -0.73742300 | -2.45877100 |
| H  | 4.17078700  | -1.19077100 | 1.80812800  |
| H  | 7.93968700  | -1.44356000 | -0.28750900 |
| C  | -4.12555500 | -1.27382600 | -0.38342600 |
| C  | -4.79617900 | -1.34055600 | 0.83342900  |
| C  | -4.82752700 | -1.05606400 | -1.56380300 |
| C  | -6.18236400 | -1.17194200 | 0.86930400  |
| C  | -6.21418600 | -0.88953600 | -1.51797900 |
| C  | -6.90370800 | -0.94916100 | -0.30500800 |
| H  | -4.23217100 | -1.48839100 | 1.75406900  |
| H  | -4.28759300 | -0.98241700 | -2.50782500 |
| H  | -7.98249500 | -0.79539300 | -0.27309000 |
| C  | -0.03671900 | 3.18878500  | 0.09421300  |
| C  | 0.03143200  | 3.72097400  | 1.38140300  |
| C  | 0.06713800  | 4.03174400  | -1.01462500 |
| C  | 0.21577500  | 5.09735600  | 1.56905100  |
| C  | 0.23911100  | 5.41336800  | -0.83293000 |
| C  | 0.31637700  | 5.94784000  | 0.46105800  |
| H  | -0.04677800 | 3.05055200  | 2.23786300  |
| H  | 0.02157700  | 3.60558500  | -2.01780800 |
| H  | 0.46140500  | 7.01948100  | 0.60249700  |
| C  | 0.35505600  | 6.29127000  | -1.95658800 |
| C  | -6.90857500 | -0.58021000 | -2.71284100 |
| C  | 0.32244800  | 5.61300500  | 2.89663100  |
| C  | -6.83272900 | -1.15199900 | 2.12783500  |
| C  | 6.76435100  | -1.64969600 | 2.11516500  |
| C  | 6.88316300  | -1.10004200 | -2.72633000 |
| N  | 0.45784700  | 7.02484800  | -2.85571600 |
| N  | 0.42153400  | 6.00035200  | 3.99004100  |
| N  | -7.44672000 | -0.28098900 | -3.69558000 |
| N  | -7.31896500 | -1.09376900 | 3.17941500  |
| N  | 7.23987600  | -1.97821600 | 3.12089800  |
| N  | 7.40976800  | -1.18646200 | -3.75563600 |
| Pd | -0.02654200 | -1.18761100 | 0.92763600  |
| Pd | -0.02518700 | -0.87835400 | -1.62921300 |
| C  | 0.36859900  | -3.19001500 | 0.82485300  |
| C  | -0.71658900 | -1.26465100 | 3.44388400  |
| H  | 1.05613400  | -3.26913200 | -0.03324100 |
| H  | 0.94261100  | -3.35522700 | 1.75009200  |
| C  | -0.82762200 | -4.07836200 | 0.69556400  |
| C  | 0.58068200  | -0.91593400 | 3.45979900  |
| H  | -1.50802800 | -0.51816300 | 3.33867100  |
| H  | -1.03862100 | -2.30211300 | 3.57038500  |
| H  | -1.55193300 | -3.94292400 | 1.51021400  |
| H  | -1.35934600 | -3.93533300 | -0.25535100 |
| H  | -0.50762000 | -5.13426200 | 0.72394400  |
| H  | 0.89486800  | 0.12623800  | 3.36230100  |

H 1.37781700 -1.65187900 3.59508500

TS4-5

0 3

O -0.14324200 1.32182100 -1.21059400  
C -0.32747800 1.72743400 -0.03801800  
O -0.57427400 1.01826400 0.98108400  
O -2.09488200 -1.77141400 0.61309500  
C -2.64792200 -1.45663200 -0.47448300  
O -2.08216500 -1.16920600 -1.56761900  
O 2.04606100 -0.76216100 -1.48907000  
C 2.61428400 -0.59263400 -0.37166900  
O 2.07046200 -0.40764000 0.74782200  
C 4.09524400 -0.70733600 -0.38254000  
C 4.79147700 -0.67590800 -1.58623800  
C 4.76328000 -0.97137500 0.80911700  
C 6.16934100 -0.91169600 -1.59205600  
C 6.13502600 -1.24329100 0.79150000  
C 6.85089900 -1.20265700 -0.40715400  
H 4.25360300 -0.49412100 -2.51701100  
H 4.20235600 -1.00591900 1.74354300  
H 7.91853900 -1.42277000 -0.42297300  
C -4.13140400 -1.36805400 -0.46317900  
C -4.80658700 -1.47851100 0.74851000  
C -4.82888100 -1.06926400 -1.63014700  
C -6.18774400 -1.26908000 0.79896600  
C -6.21284100 -0.87381000 -1.57604900  
C -6.90220600 -0.97133200 -0.36356800  
H -4.24463600 -1.69171500 1.65753300  
H -4.28657600 -0.96119100 -2.56978100  
H -7.97706500 -0.79311500 -0.32369000  
C -0.19997600 3.20288800 0.19734100  
C -0.12009600 3.67999200 1.50502100  
C -0.08045600 4.08746000 -0.87711600  
C 0.09778800 5.04314400 1.74672400  
C 0.11701700 5.45672300 -0.64026900  
C 0.21072300 5.93614300 0.67424900  
H -0.20516300 2.97795800 2.33478200  
H -0.12922000 3.70096400 -1.89611600  
H 0.38191900 6.99735200 0.85859600  
C 0.25157600 6.37641200 -1.72768000  
C -6.91477700 -0.51201200 -2.75500300  
C 0.23710400 5.49785100 3.09304400  
C -6.83594300 -1.29596000 2.06125200  
C 6.77143300 -1.65171100 1.99229600  
C 6.85782300 -0.92541500 -2.83128700  
N 0.37253300 7.14314900 -2.59628800  
N 0.36911300 5.83170200 4.20043100  
N -7.47656800 -0.18482700 -3.71664700  
N -7.31750700 -1.28464900 3.11764800  
N 7.24761100 -2.04774500 2.97432900  
N 7.38634800 -0.96645000 -3.86336200  
Pd -0.03559900 -1.05325400 0.99411800  
Pd -0.02989000 -0.83844200 -1.62028800  
C 0.73193400 -3.21801600 0.99011300  
C 0.04554700 -2.52968500 2.80359700  
H 0.71201500 -2.81378200 -0.04175700  
H 1.78359000 -3.25979300 1.29656200  
C -0.00364100 -4.52158600 1.01646800  
C 0.02321700 -1.13451000 3.06994000

|   |             |             |            |
|---|-------------|-------------|------------|
| H | -0.92007900 | -3.04232600 | 2.80266800 |
| H | 0.85970100  | -3.11990700 | 3.23217700 |
| H | 0.06273700  | -5.03812900 | 1.98350300 |
| H | -1.06534600 | -4.38908000 | 0.76855100 |
| H | 0.42321200  | -5.19462700 | 0.25697600 |
| H | -0.91931100 | -0.64646500 | 3.33595400 |
| H | 0.93329100  | -0.62629800 | 3.40369600 |

INT5

0 3

|    |             |             |             |
|----|-------------|-------------|-------------|
| O  | -0.18186500 | 1.54179700  | -1.10787100 |
| C  | -0.25249200 | 1.78627800  | 0.12041800  |
| O  | -0.36303100 | 0.94341600  | 1.05856000  |
| O  | -2.04638300 | -1.60197000 | 0.43743900  |
| C  | -2.63453400 | -1.27915200 | -0.64277200 |
| O  | -2.11110800 | -0.92442600 | -1.72929300 |
| O  | 2.01622300  | -0.49595900 | -1.68319400 |
| C  | 2.56228000  | -0.69819700 | -0.56934400 |
| O  | 2.00039700  | -0.92114100 | 0.54865700  |
| C  | 4.04245600  | -0.72323400 | -0.54878000 |
| C  | 4.74459900  | -0.45925000 | -1.71967600 |
| C  | 4.71722900  | -1.08622200 | 0.61254000  |
| C  | 6.13721400  | -0.56739200 | -1.72627200 |
| C  | 6.11015100  | -1.19750200 | 0.59437000  |
| C  | 6.83170400  | -0.93506400 | -0.57204900 |
| H  | 4.20128700  | -0.19259300 | -2.62617400 |
| H  | 4.15506300  | -1.30524900 | 1.52024200  |
| H  | 7.91708800  | -1.03581000 | -0.58676400 |
| C  | -4.11425200 | -1.28876300 | -0.58709900 |
| C  | -4.76233000 | -1.56287600 | 0.61317600  |
| C  | -4.84263800 | -0.91759200 | -1.71266200 |
| C  | -6.15311500 | -1.44930500 | 0.68892700  |
| C  | -6.23299300 | -0.80824100 | -1.62830900 |
| C  | -6.89985300 | -1.07553300 | -0.43039800 |
| H  | -4.17959600 | -1.82963100 | 1.49444300  |
| H  | -4.32001600 | -0.68303400 | -2.63998700 |
| H  | -7.98258200 | -0.96735900 | -0.36341500 |
| C  | -0.17705600 | 3.22566600  | 0.53957500  |
| C  | -0.11523000 | 3.54875300  | 1.89542800  |
| C  | -0.12656300 | 4.23572300  | -0.42328800 |
| C  | 0.00682100  | 4.88664700  | 2.29593800  |
| C  | -0.01373300 | 5.57718800  | -0.02705200 |
| C  | 0.05488100  | 5.90419800  | 1.33459400  |
| H  | -0.15046400 | 2.75111200  | 2.63798700  |
| H  | -0.16791800 | 3.96956900  | -1.48036200 |
| H  | 0.15139000  | 6.94590600  | 1.64270600  |
| C  | 0.04727900  | 6.62094200  | -1.00296800 |
| C  | -6.95483800 | -0.34950600 | -2.75816400 |
| C  | 0.10038100  | 5.19913100  | 3.68702200  |
| C  | -6.78964100 | -1.64664700 | 1.94003800  |
| C  | 6.78230400  | -1.63848700 | 1.76137400  |
| C  | 6.83238300  | -0.35339200 | -2.94144600 |
| N  | 0.10381900  | 7.48178400  | -1.78555600 |
| N  | 0.18724800  | 5.43004600  | 4.82494300  |
| N  | -7.51383500 | 0.07026100  | -3.68384500 |
| N  | -7.27454000 | -1.77010400 | 2.98685900  |
| N  | 7.30628100  | -2.03821900 | 2.71612000  |
| N  | 7.36519500  | -0.20618900 | -3.96090500 |
| Pd | -0.03990100 | -1.18526200 | 0.59840800  |
| Pd | -0.06634400 | -0.50516100 | -1.91062500 |

|   |             |             |            |
|---|-------------|-------------|------------|
| C | 1.04334800  | -3.90968400 | 2.04626700 |
| C | -0.10353700 | -3.15356200 | 2.70726300 |
| H | 1.04548600  | -3.69578200 | 0.95979200 |
| H | 2.00259600  | -3.50545500 | 2.41336800 |
| C | 0.97879800  | -5.40492400 | 2.26886300 |
| C | -0.02320500 | -1.66954200 | 2.60096700 |
| H | -1.07602400 | -3.51102600 | 2.32497300 |
| H | -0.12771900 | -3.40254700 | 3.78902700 |
| H | 1.02510100  | -5.65283500 | 3.33937200 |
| H | 0.04330500  | -5.83187200 | 1.87897000 |
| H | 1.80815100  | -5.92871900 | 1.77653100 |
| H | -0.89234300 | -1.11415100 | 2.97771700 |
| H | 0.92652000  | -1.22060600 | 2.92697800 |

INT6

0 1

|   |             |             |              |
|---|-------------|-------------|--------------|
| O | 0.40886400  | 0.97514500  | 1.15083800   |
| C | 0.44692000  | 1.75690700  | 0.17442200   |
| O | 0.43495900  | 1.44017000  | -1.05445800  |
| O | 2.13568200  | -1.09082900 | -1.45090300  |
| C | 2.65394300  | -1.37680300 | -0.32857500  |
| O | 2.05763000  | -1.58386100 | 0.76532100   |
| O | -1.97937000 | -0.74668100 | 0.70564400   |
| C | -2.46922000 | -0.52413500 | -0.43575600  |
| O | -1.85219800 | -0.43836900 | -1.54092600  |
| C | -3.94042000 | -0.41102300 | -0.51516400  |
| C | -4.70912800 | -0.65553200 | 0.61858700   |
| C | -4.54738700 | -0.16484000 | -1.74315500  |
| C | -6.10265700 | -0.67010300 | 0.51344400   |
| C | -5.94125000 | -0.17840400 | -1.83765500  |
| C | -6.72914900 | -0.42880200 | -0.711172700 |
| H | -4.22091700 | -0.86236100 | 1.57157100   |
| H | -3.93346300 | 0.00817500  | -2.62677000  |
| H | -7.81595000 | -0.45901700 | -0.79222700  |
| C | 4.13061800  | -1.45501600 | -0.31112600  |
| C | 4.84747300  | -1.25528000 | -1.48838500  |
| C | 4.79349600  | -1.66800600 | 0.89313600   |
| C | 6.24462800  | -1.26793600 | -1.45608700  |
| C | 6.19074700  | -1.67015700 | 0.91753600   |
| C | 6.92609800  | -1.47492000 | -0.25388000  |
| H | 4.31653700  | -1.07455600 | -2.42276600  |
| H | 4.22108200  | -1.80937400 | 1.80990700   |
| H | 8.01600900  | -1.46959100 | -0.22794200  |
| C | 0.49004300  | 3.23154600  | 0.45479600   |
| C | 0.56885900  | 4.13285800  | -0.60673000  |
| C | 0.41412500  | 3.70308100  | 1.76708600   |
| C | 0.57045800  | 5.51258200  | -0.36181500  |
| C | 0.40980300  | 5.08459200  | 2.01762000   |
| C | 0.48980900  | 5.99189500  | 0.95157500   |
| H | 0.62127800  | 3.75298900  | -1.62744900  |
| H | 0.34868900  | 2.98743200  | 2.58795400   |
| H | 0.48383700  | 7.06521300  | 1.14511300   |
| C | 0.30913000  | 5.58651100  | 3.35358300   |
| C | 0.63981500  | 6.41685200  | -1.46486700  |
| C | 6.85396100  | -1.83388000 | 2.15950800   |
| C | 6.97075200  | -1.03268400 | -2.65238700  |
| C | -6.54322700 | -0.00200300 | -3.10923800  |
| C | -6.87607800 | -1.00204600 | 1.65402300   |
| C | -1.67535200 | -3.69928100 | 0.90971700   |
| C | -0.27217500 | -3.21203800 | 0.69241600   |



|    |             |             |             |
|----|-------------|-------------|-------------|
| H  | 0.43976800  | -3.59770100 | 1.44194400  |
| H  | 0.11834300  | -3.44468500 | -0.31296500 |
| H  | -2.36290800 | -3.27226800 | 0.15799200  |
| H  | -1.67938000 | -4.78583400 | 0.68870600  |
| C  | -2.22555400 | -3.47962200 | 2.31093100  |
| H  | -2.18932300 | -2.40329200 | 2.55287700  |
| H  | -1.55187000 | -3.96254100 | 3.03991700  |
| C  | -3.63642700 | -4.00183900 | 2.48557700  |
| H  | -4.33254800 | -3.53787500 | 1.76974800  |
| H  | -3.69018200 | -5.08778500 | 2.31850700  |
| H  | -4.02875000 | -3.80746400 | 3.49247300  |
| N  | 0.21877100  | 6.01837500  | 4.43180800  |
| N  | 0.69026700  | 7.12808100  | -2.38504500 |
| N  | 7.36586700  | -1.94427300 | 3.19469100  |
| N  | 7.54976700  | -0.82088200 | -3.63575900 |
| N  | -7.00109100 | 0.10271900  | -4.17014800 |
| N  | -7.48607400 | -1.31886000 | 2.58865900  |
| Pd | 0.02668900  | -1.20852000 | 0.90939900  |
| Pd | 0.15889300  | -0.67311200 | -1.58167300 |

TS6-7

0 3

|   |             |             |             |
|---|-------------|-------------|-------------|
| O | -0.57672800 | 0.85480000  | 1.07799000  |
| C | -0.41978600 | 1.64235900  | 0.10684400  |
| O | -0.27401100 | 1.32663300  | -1.10412600 |
| O | 1.95274700  | -0.63130800 | -1.63909200 |
| C | 2.54415800  | -0.58781600 | -0.52489700 |
| O | 2.02667500  | -0.62988800 | 0.62308400  |
| O | -2.14726600 | -1.81949500 | 0.54449700  |
| C | -2.70054200 | -1.51423700 | -0.54501600 |
| O | -2.14036000 | -1.18205600 | -1.62739900 |
| C | -4.18487500 | -1.48363600 | -0.54763100 |
| C | -4.87325900 | -1.71378700 | 0.63860500  |
| C | -4.87180700 | -1.09884000 | -1.69538900 |
| C | -6.25912600 | -1.53958400 | 0.68197700  |
| C | -6.25896900 | -0.93026500 | -1.64570900 |
| C | -6.96374400 | -1.15141100 | -0.45933700 |
| H | -4.32061200 | -1.98807200 | 1.53679900  |
| H | -4.31855100 | -0.89454500 | -2.61210500 |
| H | -8.04155400 | -0.99264400 | -0.41852600 |
| C | 4.02554000  | -0.54916600 | -0.58351700 |
| C | 4.67076600  | -0.33558000 | -1.79716600 |
| C | 4.75968600  | -0.84571200 | 0.55947100  |
| C | 6.06397900  | -0.42551800 | -1.86144100 |
| C | 6.14986400  | -0.96465500 | 0.48026500  |
| C | 6.81486400  | -0.74466800 | -0.72728800 |
| H | 4.08419800  | -0.12763800 | -2.69212100 |
| H | 4.24181600  | -1.02476200 | 1.50160900  |
| H | 7.89813600  | -0.84862000 | -0.79163300 |
| C | -0.36274000 | 3.10778500  | 0.42254700  |
| C | -0.32149400 | 4.04980500  | -0.60739800 |
| C | -0.28504700 | 3.52434800  | 1.75178400  |
| C | -0.20459900 | 5.41536900  | -0.30754600 |
| C | -0.14955500 | 4.88649600  | 2.05688600  |
| C | -0.11432700 | 5.83550700  | 1.02680700  |
| H | -0.37083200 | 3.71150400  | -1.64321100 |
| H | -0.31203600 | 2.77794200  | 2.54632400  |
| H | -0.00817000 | 6.89536400  | 1.26120300  |
| C | -0.01863100 | 5.30024200  | 3.41859400  |
| C | -0.15464500 | 6.38334900  | -1.35916500 |

|    |             |             |             |
|----|-------------|-------------|-------------|
| C  | 6.86051300  | -1.40508300 | 1.62474500  |
| C  | 6.70701100  | -0.26377300 | -3.11357600 |
| C  | -6.94242400 | -0.44948600 | -2.79189800 |
| C  | -6.92069800 | -1.67948400 | 1.92812700  |
| N  | 0.10692900  | 5.62410000  | 4.53017800  |
| N  | -0.10614400 | 7.17557500  | -2.21165600 |
| N  | 7.39445600  | -1.83171600 | 2.56254200  |
| N  | 7.20700700  | -0.16710800 | -4.15570900 |
| N  | -7.48155500 | -0.00982700 | -3.72083300 |
| N  | -7.40898500 | -1.75297300 | 2.97829100  |
| Pd | -0.11178200 | -0.77680400 | -1.68172100 |
| Pd | -0.06458600 | -1.24057600 | 0.87692200  |
| C  | 1.93824500  | -3.07738700 | 2.66121800  |
| C  | 0.46437900  | -2.83176300 | 2.51381500  |
| H  | 2.06570500  | -3.58172100 | 3.63570100  |
| H  | 2.45204400  | -2.10886000 | 2.75974700  |
| C  | 2.56430700  | -3.91378900 | 1.56625900  |
| C  | -0.15179700 | -1.67401500 | 3.00936000  |
| H  | -0.16839300 | -3.72486300 | 2.40820000  |
| H  | 2.06499500  | -4.88748800 | 1.45846400  |
| H  | 2.50532600  | -3.40244400 | 0.59285300  |
| H  | 3.62476400  | -4.11169100 | 1.76910600  |
| H  | -1.22425600 | -1.65573100 | 3.21652200  |
| H  | 0.45422400  | -0.88799500 | 3.47014600  |
| H  | 0.34422700  | -2.75773500 | 0.86036200  |

#### INT7

0 3

|   |             |             |             |
|---|-------------|-------------|-------------|
| O | -0.36964800 | 0.82339600  | 1.08060100  |
| C | -0.32679000 | 1.63396300  | 0.12271500  |
| O | -0.29197300 | 1.34681100  | -1.10981100 |
| O | 1.95045000  | -0.61799200 | -1.72364500 |
| C | 2.52540200  | -0.73718000 | -0.61118200 |
| O | 1.99372800  | -0.93148500 | 0.52241300  |
| O | -2.10022200 | -1.65881800 | 0.52752600  |
| C | -2.68913800 | -1.43318100 | -0.57047200 |
| O | -2.17016200 | -1.15710300 | -1.68387400 |
| C | -4.16999800 | -1.44030500 | -0.52447500 |
| C | -4.83354800 | -1.69065500 | 0.67204700  |
| C | -4.88254400 | -1.07518500 | -1.66234400 |
| C | -6.22392300 | -1.55928000 | 0.72895600  |
| C | -6.27156900 | -0.94235300 | -1.59524200 |
| C | -6.95432300 | -1.18753200 | -0.40215700 |
| H | -4.26410700 | -1.95153100 | 1.56386600  |
| H | -4.34762000 | -0.85755200 | -2.58646000 |
| H | -8.03567200 | -1.06108600 | -0.34583300 |
| C | 4.00462600  | -0.68622700 | -0.62996600 |
| C | 4.66136100  | -0.41299900 | -1.82512800 |
| C | 4.72758900  | -0.99296800 | 0.51775000  |
| C | 6.05662300  | -0.45572200 | -1.87016700 |
| C | 6.12301700  | -1.04124600 | 0.46053500  |
| C | 6.79941300  | -0.76847300 | -0.73013400 |
| H | 4.08191600  | -0.19182900 | -2.72123900 |
| H | 4.20193700  | -1.22007600 | 1.44492900  |
| H | 7.88741000  | -0.82074800 | -0.77393900 |
| C | -0.28659300 | 3.09613200  | 0.45728000  |
| C | -0.27909900 | 4.05269900  | -0.55954600 |
| C | -0.21271500 | 3.49724600  | 1.79207900  |
| C | -0.19691100 | 5.41677600  | -0.24240900 |
| C | -0.12194400 | 4.85921400  | 2.11527300  |

|    |             |             |             |
|----|-------------|-------------|-------------|
| C  | -0.11641800 | 5.82200200  | 1.09686800  |
| H  | -0.32989100 | 3.72788100  | -1.59950000 |
| H  | -0.21528300 | 2.73940800  | 2.57643000  |
| H  | -0.04365100 | 6.88152600  | 1.34510200  |
| C  | -0.01563700 | 5.26622800  | 3.48185700  |
| C  | -0.17913300 | 6.39543200  | -1.28484200 |
| C  | 6.84611900  | -1.43455300 | 1.61323200  |
| C  | 6.70486300  | -0.23694700 | -3.11011500 |
| C  | -6.96611800 | -0.47071500 | -2.73714800 |
| C  | -6.88055700 | -1.72729100 | 1.97348200  |
| N  | 0.08323600  | 5.59443300  | 4.59506700  |
| N  | -0.15831500 | 7.19093400  | -2.13528500 |
| N  | 7.41403900  | -1.79963300 | 2.55645400  |
| N  | 7.19743600  | -0.08999800 | -4.14960200 |
| N  | -7.49060500 | -0.03215300 | -3.67438700 |
| N  | -7.38841500 | -1.82094400 | 3.01230700  |
| Pd | -0.13617900 | -0.70536700 | -1.80869200 |
| Pd | -0.04914700 | -1.32043200 | 0.68147900  |
| C  | 1.88644500  | -2.87851600 | 3.11237500  |
| C  | 0.42145500  | -2.62869100 | 2.99950600  |
| H  | 2.05841000  | -3.30045200 | 4.12017000  |
| H  | 2.42429100  | -1.91711200 | 3.10493000  |
| C  | 2.45102700  | -3.83456900 | 2.07831600  |
| C  | -0.18462000 | -1.43191900 | 3.17701800  |
| H  | -0.21136300 | -3.51094900 | 2.83032400  |
| H  | 1.92459800  | -4.79993100 | 2.09006600  |
| H  | 2.36505900  | -3.42299000 | 1.06205400  |
| H  | 3.51361000  | -4.04130000 | 2.26382800  |
| H  | -1.27224300 | -1.33661200 | 3.19212600  |
| H  | 0.39250800  | -0.52968000 | 3.40016000  |
| H  | 0.19791700  | -2.77628200 | 0.28347500  |

## S8. References

- (1) Sohn, J. R.; Park, W. C.; Kim, H. W. Characterization of nickel sulfate supported on  $\gamma$ -Al<sub>2</sub>O<sub>3</sub> for ethylene dimerization and its relationship to acidic properties. *J. Catal.* **2002**, *209*, 69-74.
- (2) Sohn, J. R.; Cho, E. S. Promoting effect of Al<sub>2</sub>O<sub>3</sub> on catalytic activity of NiSO<sub>4</sub>/ZrO<sub>2</sub> for ethylene dimerization. *Appl. Catal. A: Gen.* **2005**, *282*, 147-154.
- (3) Lapidus, A.; Slinkin, A.; Rudakova, L.; Myshenkova, T.; Loktev, M.; Papko, T.; Éidus, Y. T. Influence of the composition of the catalytic system NiO-SiO<sub>2</sub>-Al<sub>2</sub>O<sub>3</sub> on its catalytic properties in reactions of oligomerization of ethylene and isobutylene. *Bull. Acad. Sci. USSR, Div. Chem. Sci.* **1974**, *23*, 1880-1884.
- (4) Sohn, J. R.; Kim, H. J. High catalytic activity of NiO-TiO<sub>2</sub>SO<sub>4</sub><sup>2-</sup> for ethylene dimerization. *J. Catal.* **1986**, *101*, 428-433.
- (5) Sohn, J. R.; Shin, D. C. New Catalyst of NiO-ZrO<sub>2</sub>/WO<sub>3</sub> for ethylene dimerization. *J. Catal.* **1996**, *160*, 314-316.
- (6) Sohn, J. R.; Kwon, S. H.; Shin, D. C. Spectroscopic studies on NiO supported on ZrO<sub>2</sub> modified with MoO<sub>3</sub> for ethylene dimerization. *Appl. Catal. A: Gen.* **2007**, *317*, 216-225.
- (7) Pae, Y.-I.; Sohn, J.-R. Effect of Al<sub>2</sub>O<sub>3</sub> addition and WO<sub>3</sub> modification on catalytic activity of NiO/Al<sub>2</sub>O<sub>3</sub>-TiO<sub>2</sub>/WO<sub>3</sub> for ethylene dimerization. *Bull. Korean Chem. Soc.* **2007**, *28*, 1763-1770.
- (8) Sohn, J. R.; Kim, H. W.; Park, M. Y.; Park, E. H.; Kim, J. T.; Park, S. E. Highly active catalyst of NiO-ZrO<sub>2</sub> modified with H<sub>2</sub>SO<sub>4</sub> for ethylene dimerization. *Appl. Catal. A: Gen.* **1995**, *128*, 127-141.
- (9) Lallemand, M.; Rusu, O. A.; Dumitriu, E.; Finiels, A.; Fajula, F.; Hulea, V. NiMCM-36 and NiMCM-22 catalysts for the ethylene oligomerization: Effect of zeolite texture and nickel cations/acid sites ratio. *Appl. Catal. A: Gen.* **2008**, *338*, 37-43.
- (10) Zhang, Q.; Kantcheva, M.; Dalla Lana, I. G. Oligomerization of ethylene in a slurry reactor using a nickel/sulfated alumina catalyst. *Ind. Eng. Chem. Res.* **1997**, *36*, 3433-3438.
- (11) Canivet, J.; Aguado, S.; Schuurman, Y.; Farrusseng, D. MOF-supported selective ethylene dimerization single-site catalysts through one-pot postsynthetic modification. *J. Am. Chem. Soc.* **2013**, *135*, 4195-4198.
- (12) Metzger, E. D.; Brozek, C. K.; Comito, R. J.; Dincă, M. Selective dimerization of ethylene to 1-butene with a porous catalyst. *ACS Central Sci.* **2016**, *2*, 148-153.
- (13) Liu, J.; Ye, J.; Li, Z.; Otake, K.-i.; Liao, Y.; Peters, A. W.; Noh, H.; Truhlar, D. G.; Gagliardi, L.; Cramer, C. J. Beyond the active site: tuning the activity and selectivity of a metal-organic framework-supported Ni catalyst for ethylene dimerization. *J. Am. Chem. Soc.* **2018**, *140*, 11174-11178.
- (14) Agirrezabal-Telleria, I.; Luz, I.; Ortuño, M. A.; Oregui-Bengoechea, M.; Gandarias, I.; López, N.; Lail, M. A.; Soukri, M. Gas reactions under intrapore condensation regime within tailored metal-organic framework catalysts. *Nat. Commun.* **2019**, *10*, 2076.

- (15) Heinz, W. R.; Agirrezabal-Telleria, I.; Junk, R.; Berger, J.; Wang, J.; Sharapa, D. I.; Gil-Calvo, M.; Luz, I.; Soukri, M.; Studt, F. Thermal defect engineering of precious group metal–organic frameworks: a case study on Ru/Rh-HKUST-1 analogues. *ACS Applied Mater. Interfaces* **2020**, *12*, 40635-40647.
- (16) Zhang, C.-L.; Zhou, T.; Li, Y.-Q.; Lu, X.; Guan, Y.-B.; Cao, Y.-C.; Cao, G.-P. Microenvironment modulation of metal–organic frameworks for coordination olefin oligomerization and (co)polymerization. *Small* **2023**, *19*, 2205898.
